# Supplementary material
Source: publisher site journal article supplement (https://www.dovepress.com/article/supplementary_file/587532/587532%20Supplementary%20material.xlsx)
Supplement: Supplementary file 1 [file 587532%20Supplementary%20material.xlsx]

## Sheet: Supplementary Material-TCGA.LIH
sampleID	_INTEGRATION	_PATIENT	_cohort	_primary_disease	_primary_site	additional_pharmaceutical_therapy	additional_radiation_therapy	adjacent_hepatic_tissue_inflammation_extent_type	age_at_initial_pathologic_diagnosis	albumin_result_lower_limit	albumin_result_specified_value	albumin_result_upper_limit	bcr_followup_barcode	bcr_patient_barcode	bcr_sample_barcode	bilirubin_lower_limit	bilirubin_upper_limit	cancer_first_degree_relative	child_pugh_classification_grade	creatinine_lower_level	creatinine_upper_limit	creatinine_value_in_mg_dl	days_to_birth	days_to_collection	days_to_death	days_to_initial_pathologic_diagnosis	days_to_last_followup	days_to_new_tumor_event_additional_surgery_procedure	days_to_new_tumor_event_after_initial_treatment	eastern_cancer_oncology_group	fetoprotein_outcome_lower_limit	fetoprotein_outcome_upper_limit	fetoprotein_outcome_value	fibrosis_ishak_score	followup_case_report_form_submission_reason	form_completion_date	gender	height	hist_hepato_carc_fact	hist_hepato_carcinoma_risk	histological_type	history_of_neoadjuvant_treatment	icd_10	icd_o_3_histology	icd_o_3_site	informed_consent_verified	initial_weight	inter_norm_ratio_lower_limit	intern_norm_ratio_upper_limit
TCGA-2V-A95S-01	TCGA-2V-A95S-01	TCGA-2V-A95S	TCGA Liver Cancer (LIHC)	liver hepatocellular carcinoma	Liver			Severe		3.5	4.2	5.2		TCGA-2V-A95S	TCGA-2V-A95S-01A	0	1.5		A	0.7	1.2	0.6								4	0	8	10793	6 - Established Cirrhosis		2015-06-15	MALE	173	Other	former smoker	Hepatocellular Carcinoma	No	C22.0	8170-03-01	C22.0	YES	170	2	3
TCGA-2Y-A9GS-01	TCGA-2Y-A9GS-01	TCGA-2Y-A9GS	TCGA Liver Cancer (LIHC)	liver hepatocellular carcinoma	Liver			None	58	3.5	4	5		TCGA-2Y-A9GS	TCGA-2Y-A9GS-01A	0.2	0.7			0.8	1.5	1.6	-21318	2558	724	0					0	6	74			2014-11-03	MALE	162	Alcohol consumption		Hepatocellular Carcinoma	No	C22.0	8170-03-01	C22.0	YES	80	8.3	11.5
TCGA-2Y-A9GT-01	TCGA-2Y-A9GT-01	TCGA-2Y-A9GT	TCGA Liver Cancer (LIHC)	liver hepatocellular carcinoma	Liver			None	51	3.5	3.7	5		TCGA-2Y-A9GT		0.2	0.4	1	C	0.8	1.5	0.8	-18768		1624	0				0		7	17			2014-11-03	MALE	182	Alcohol consumption|Hepatitis B|Hepatitis C		Hepatocellular Carcinoma	No	C22.0	8170-03-01	C22.0	YES		8.3	11.5
TCGA-2Y-A9GU-01	TCGA-2Y-A9GU-01	TCGA-2Y-A9GU	TCGA Liver Cancer (LIHC)	liver hepatocellular carcinoma	Liver			None	55	3.5	4.4	5	TCGA-2Y-A9GU-F69082	TCGA-2Y-A9GU	TCGA-2Y-A9GU-01A	0.2	0.3	2		0.8	1.5	0.9	-20187	1752		0	1939			0	0	6	304			2014-12-29	FEMALE	154	No History of Primary Risk Factors		Hepatocellular Carcinoma	No	C22.0	8170-03-01	C22.0	YES	120	8.3	11.5
TCGA-2Y-A9GV-01	TCGA-2Y-A9GV-01	TCGA-2Y-A9GV	TCGA Liver Cancer (LIHC)	liver hepatocellular carcinoma	Liver				54	3.5	4.2	5		TCGA-2Y-A9GV		0.2	0.3			0.8	1.5	0.6	-20011		2532	0				2		7	6			2014-11-03	FEMALE	167	Alcohol consumption		Hepatocellular Carcinoma	No	C22.0	8170-03-01	C22.0	YES		8.3	11.5
TCGA-2Y-A9GW-01	TCGA-2Y-A9GW-01	TCGA-2Y-A9GW	TCGA Liver Cancer (LIHC)	liver hepatocellular carcinoma	Liver			None	64	3.5	4.5	5		TCGA-2Y-A9GW	TCGA-2Y-A9GW-01A	0.2	0.6	1		0.8	1.5	1	-23587	2375	1271	0					0	6	2			2014-11-03	MALE	182	Alcohol consumption		Hepatocellular Carcinoma	No	C22.0	8170-03-01	C22.0	YES	80	8.3	11.5
TCGA-2Y-A9GX-01	TCGA-2Y-A9GX-01	TCGA-2Y-A9GX	TCGA Liver Cancer (LIHC)	liver hepatocellular carcinoma	Liver	NO	NO	None	68	3.5	4.3	5	TCGA-2Y-A9GX-F69170	TCGA-2Y-A9GX		0.2	0.4			0.8	1.5	0.7	-24963			0	2442		2133	1	0	7	1			2014-12-30	MALE	175	Alcohol consumption		Hepatocellular Carcinoma	No	C22.0	8170-03-01	C22.0	YES		8.3	11.5
TCGA-2Y-A9GY-01	TCGA-2Y-A9GY-01	TCGA-2Y-A9GY	TCGA Liver Cancer (LIHC)	liver hepatocellular carcinoma	Liver			None	64	3.5	4.2	5		TCGA-2Y-A9GY		0.2	0.4	2		0.8	1.5	0.6	-23435		757	0					0	7	27600			2014-11-03	FEMALE	161	No History of Primary Risk Factors		Hepatocellular Carcinoma	No	C22.0	8170-03-01	C22.0	YES		8.3	11.5
TCGA-2Y-A9GZ-01	TCGA-2Y-A9GZ-01	TCGA-2Y-A9GZ	TCGA Liver Cancer (LIHC)	liver hepatocellular carcinoma	Liver			None	82	3.5	4.5	5		TCGA-2Y-A9GZ		0.2	0.7	4	A	0.8	1.5	1.1	-30082		848	0					0	7	7			2014-11-03	FEMALE	153	No History of Primary Risk Factors		Hepatocellular Carcinoma	No	C22.0	8170-03-01	C22.0	YES		8.3	11.5
TCGA-2Y-A9H0-01	TCGA-2Y-A9H0-01	TCGA-2Y-A9H0	TCGA Liver Cancer (LIHC)	liver hepatocellular carcinoma	Liver			None	49	3.5	2	5	TCGA-2Y-A9H0-F69171	TCGA-2Y-A9H0	TCGA-2Y-A9H0-01A	0.2	0.8			0.8	1.5	0.8	-18109	3538		0	3675			0	0	8	7598			2014-12-30	MALE	180	Alcohol consumption|Hepatitis B|Hepatitis C		Hepatocellular Carcinoma	No	C22.0	8170-03-01	C22.0	YES	130	8.3	11.5
TCGA-2Y-A9H1-01	TCGA-2Y-A9H1-01	TCGA-2Y-A9H1	TCGA Liver Cancer (LIHC)	liver hepatocellular carcinoma	Liver				58	3.5	4.4	5		TCGA-2Y-A9H1		0.2	0.5			0.8	1.5	0.9	-21222		1229	0				1	0	7	3	1,2 - Portal Fibrosis		2014-11-03	MALE	171	Alcohol consumption|Hepatitis C		Hepatocellular Carcinoma	No	C22.0	8170-03-01	C22.0	YES		8.3	11.5
TCGA-2Y-A9H2-01	TCGA-2Y-A9H2-01	TCGA-2Y-A9H2	TCGA Liver Cancer (LIHC)	liver hepatocellular carcinoma	Liver			None	64	3.5	4.5	5	TCGA-2Y-A9H2-F69173	TCGA-2Y-A9H2	TCGA-2Y-A9H2-01A	0.2	0.4			0.8	1.5	1.4	-23653	1443		0	1731			0	0	7	2			2014-12-30	FEMALE	176	Alcohol consumption		Hepatocellular Carcinoma	No	C22.0	8170-03-01	C22.0	YES	80	8.3	11.5
TCGA-2Y-A9H3-01	TCGA-2Y-A9H3-01	TCGA-2Y-A9H3	TCGA Liver Cancer (LIHC)	liver hepatocellular carcinoma	Liver			None	45	3.5	5.3	5	TCGA-2Y-A9H3-F69086	TCGA-2Y-A9H3		0.2	0.3	3		0.8	1.5	0.9	-16443			0	1516			2	0	7	5640	1,2 - Portal Fibrosis		2014-12-29	MALE	179	Alcohol consumption|Non-Alcoholic Fatty Liver Disease		Hepatocellular Carcinoma	No	C22.0	8170-03-01	C22.0	YES		8.3	11.5
TCGA-2Y-A9H4-01	TCGA-2Y-A9H4-01	TCGA-2Y-A9H4	TCGA Liver Cancer (LIHC)	liver hepatocellular carcinoma	Liver				68	3.5	4.6	5	TCGA-2Y-A9H4-F69087	TCGA-2Y-A9H4	TCGA-2Y-A9H4-01A	0.2	0.3	2	A	0.8	1.5	1.2	-25096	1210		0	1452			0	0	7	11			2014-12-29	MALE	167	Alcohol consumption|Hepatitis B		Hepatocellular Carcinoma	No	C22.0	8170-03-01	C22.0	YES	100	8.3	11.5
TCGA-2Y-A9H5-01	TCGA-2Y-A9H5-01	TCGA-2Y-A9H5	TCGA Liver Cancer (LIHC)	liver hepatocellular carcinoma	Liver				59	3.5	4.9	5		TCGA-2Y-A9H5	TCGA-2Y-A9H5-01A	0.2	0.3	2		0.8	1.5	0.6	-21818	1101	555	0					0	7	11700	1,2 - Portal Fibrosis		2014-11-03	FEMALE	157	Alcohol consumption|Hepatitis C		Hepatocellular Carcinoma	No	C22.0	8170-03-01	C22.0	YES	30	8.3	11.5
TCGA-2Y-A9H6-01	TCGA-2Y-A9H6-01	TCGA-2Y-A9H6	TCGA Liver Cancer (LIHC)	liver hepatocellular carcinoma	Liver			None	68	3.5	4	5	TCGA-2Y-A9H6-F69088	TCGA-2Y-A9H6	TCGA-2Y-A9H6-01A	0.3	0.3	1		0.8	1.5	1.8	-24982	982		0	357			0	0	7	114			2014-12-29	FEMALE	156	Alcohol consumption		Hepatocellular Carcinoma	No	C22.0	8170-03-01	C22.0	YES	100	8.3	11.5
TCGA-2Y-A9H7-01	TCGA-2Y-A9H7-01	TCGA-2Y-A9H7	TCGA Liver Cancer (LIHC)	liver hepatocellular carcinoma	Liver	NO	NO	None	81	3.5	3.4	5	TCGA-2Y-A9H7-F69176	TCGA-2Y-A9H7	TCGA-2Y-A9H7-01A	0.2	0.3		A	0.8	1.5	1.2	-29752	846		0	1168		1117	2	0	7	6	3,4 - Fibrous Speta		2014-12-30	FEMALE	157	No History of Primary Risk Factors		Hepatocellular Carcinoma	No	C22.0	8170-03-01	C22.0	YES	140	8.3	11.5
TCGA-2Y-A9H8-01	TCGA-2Y-A9H8-01	TCGA-2Y-A9H8	TCGA Liver Cancer (LIHC)	liver hepatocellular carcinoma	Liver				85	3.5	4.2	5		TCGA-2Y-A9H8	TCGA-2Y-A9H8-01A	0.2	0.3	2		0.8	1.5	0.6	-31322	792	633	0				2	0	7	234000			2014-11-03	FEMALE	150	Alcohol consumption		Hepatocellular Carcinoma	No	C22.0	8170-03-01	C22.0	YES	80	8.3	11.5
TCGA-2Y-A9H9-01	TCGA-2Y-A9H9-01	TCGA-2Y-A9H9	TCGA Liver Cancer (LIHC)	liver hepatocellular carcinoma	Liver	YES	NO	None	70	3.5	4.7	5	TCGA-2Y-A9H9-F69092	TCGA-2Y-A9H9	TCGA-2Y-A9H9-01A	0.2	0.6	2	A	0.8	1.2	0.8	-25670	731		0	697		701	0	0	7	12			2014-12-29	MALE	178	Alcohol consumption|Hepatitis C		Hepatocellular Carcinoma	No	C22.0	8170-03-01	C22.0	YES	120	8.3	11.5
TCGA-2Y-A9HA-01	TCGA-2Y-A9HA-01	TCGA-2Y-A9HA	TCGA Liver Cancer (LIHC)	liver hepatocellular carcinoma	Liver			None	70	3.5	3.5	5		TCGA-2Y-A9HA	TCGA-2Y-A9HA-01A	0.2	0.6		A	0.8	1.5	0.8	-25892	713	36	0				0	0	7	114	3,4 - Fibrous Speta		2014-11-03	MALE	169	Alcohol consumption|Hepatitis C		Hepatocellular Carcinoma	No	C22.0	8170-03-01	C22.0	YES	90	8.3	11.5
TCGA-2Y-A9HB-01	TCGA-2Y-A9HB-01	TCGA-2Y-A9HB	TCGA Liver Cancer (LIHC)	liver hepatocellular carcinoma	Liver			None	66	3.5	3.9	5	TCGA-2Y-A9HB-F69098	TCGA-2Y-A9HB		0.2	0.6			0.8	1.5	0.8	-24359			0	260			0	0	7	21			2014-12-29	MALE	167	Alcohol consumption		Hepatocellular Carcinoma	No	C22.0	8170-03-01	C22.0	YES		8.3	11.5
TCGA-3K-AAZ8-01	TCGA-3K-AAZ8-01	TCGA-3K-AAZ8	TCGA Liver Cancer (LIHC)	liver hepatocellular carcinoma	Liver	NO	NO		65				TCGA-3K-AAZ8-F69330	TCGA-3K-AAZ8									-24046			0	396		304					5 - Nodular Formation and Incomplete Cirrhosis		2015-01-05	MALE	172	Hepatitis C		Hepatocellular Carcinoma	No	C22.0	8170-03-01	C22.0	YES
TCGA-4R-AA8I-01	TCGA-4R-AA8I-01	TCGA-4R-AA8I	TCGA Liver Cancer (LIHC)	liver hepatocellular carcinoma	Liver			None	66	3.5	3.8	4.8	TCGA-4R-AA8I-F67448	TCGA-4R-AA8I		0.4	1.2		A	0.6	1.3	0.7	-24279		262	0	216		247	1	0	9	5	6 - Established Cirrhosis		2014-11-05	MALE	171	Non-Alcoholic Fatty Liver Disease		Hepatocellular Carcinoma	No	C22.0	8170-03-01	C22.0	YES		0.8	1.1
TCGA-5C-A9VG-01	TCGA-5C-A9VG-01	TCGA-5C-A9VG	TCGA Liver Cancer (LIHC)	liver hepatocellular carcinoma	Liver			None	58				TCGA-5C-A9VG-F68936	TCGA-5C-A9VG					A				-21273			0	328			0						2014-12-23	MALE	170	Other	Worker at steel factory	Hepatocellular Carcinoma	No	C22.0	8170-03-01	C22.0	YES
TCGA-5C-A9VH-01	TCGA-5C-A9VH-01	TCGA-5C-A9VH	TCGA Liver Cancer (LIHC)	liver hepatocellular carcinoma	Liver			None	70				TCGA-5C-A9VH-F68937	TCGA-5C-A9VH	TCGA-5C-A9VH-01A				A				-25608	127		0	322			0						2014-12-23	MALE	165	No History of Primary Risk Factors		Hepatocellular Carcinoma	No	C22.0	8170-03-01	C22.0	YES	90
TCGA-5C-AAPD-01	TCGA-5C-AAPD-01	TCGA-5C-AAPD	TCGA Liver Cancer (LIHC)	liver hepatocellular carcinoma	Liver			None	61				TCGA-5C-AAPD-F68938	TCGA-5C-AAPD	TCGA-5C-AAPD-01A				A				-22552	55		0	20			1						2014-12-23	MALE	172	Hepatitis B		Hepatocholangiocarcinoma (Mixed)	No	C22.0	8180-03-01	C22.0	YES	140
TCGA-5R-AA1C-01	TCGA-5R-AA1C-01	TCGA-5R-AA1C	TCGA Liver Cancer (LIHC)	liver hepatocellular carcinoma	Liver			None	57	3.2	3	4.6	TCGA-5R-AA1C-F72055	TCGA-5R-AA1C	TCGA-5R-AA1C-01A	0	1.8		B	0.5	1.3	1	-21073	60		0	520			1	0	15	2	1,2 - Portal Fibrosis		2015-04-06	MALE	174	No History of Primary Risk Factors		Hepatocellular Carcinoma	No	C22.0	8170-03-01	C22.0	YES	750	11	15
TCGA-5R-AA1D-01	TCGA-5R-AA1D-01	TCGA-5R-AA1D	TCGA Liver Cancer (LIHC)	liver hepatocellular carcinoma	Liver			None	17	3.2	3.3	4.6	TCGA-5R-AA1D-F70155	TCGA-5R-AA1D		0	0.5		B	0.5	1.3	0.7	-6545			0	449			1	0	15	5	0 - No Fibrosis		2015-01-28	FEMALE	161	No History of Primary Risk Factors		Hepatocellular Carcinoma	No	C22.0	8170-03-01	C22.0	YES		11	15
TCGA-5R-AAAM-01	TCGA-5R-AAAM-01	TCGA-5R-AAAM	TCGA Liver Cancer (LIHC)	liver hepatocellular carcinoma	Liver			Severe	65	3.2	3	4.6		TCGA-5R-AAAM	TCGA-5R-AAAM-01A	0	0.6		A	0.5	1.3	0.7	-24020	35	46	0				1	0	15	32	6 - Established Cirrhosis		2014-11-14	FEMALE	163	No History of Primary Risk Factors		Hepatocellular Carcinoma	No	C22.0	8170-03-01	C22.0	YES	730	11	15
TCGA-BC-4072-01	TCGA-BC-4072-01	TCGA-BC-4072	TCGA Liver Cancer (LIHC)	liver hepatocellular carcinoma	Liver	NO	NO		74	3.5	4.4	5	TCGA-BC-4072-F6875	TCGA-BC-4072	TCGA-BC-4072-01B	0	0.5	7		0.7	1.1	1	-27162	2256	1490	0			475							2010-12-20	FEMALE		No History of Primary Risk Factors		Hepatocellular Carcinoma	No	C22.0	8170-03-01	C22.0	YES	270
TCGA-BC-4073-01	TCGA-BC-4073-01	TCGA-BC-4073	TCGA Liver Cancer (LIHC)	liver hepatocellular carcinoma	Liver				73				TCGA-BC-4073-F30829	TCGA-BC-4073	TCGA-BC-4073-01B	0	0.7	3		0.7	1.3	1.5	-26795	398		0	849			0					Scheduled Follow-up Submission	2012-04-17	MALE		Hemochromatosis		Hepatocellular Carcinoma	No	C22.0	8170-03-01	C22.0	YES	230
TCGA-BC-A10Q-01	TCGA-BC-A10Q-01	TCGA-BC-A10Q	TCGA Liver Cancer (LIHC)	liver hepatocellular carcinoma	Liver	YES	NO		72	3.5	4.1	5	TCGA-BC-A10Q-F9852	TCGA-BC-A10Q	TCGA-BC-A10Q-01A		0.5	1		0.7	1.1	0.6	-26400	4437	1135	0			340							2011-04-01	FEMALE		No History of Primary Risk Factors		Hepatocellular Carcinoma	No	C22.0	8170-03-01	C22.0	YES	340
TCGA-BC-A10Q-11	TCGA-BC-A10Q-11	TCGA-BC-A10Q	TCGA Liver Cancer (LIHC)	liver hepatocellular carcinoma	Liver	YES	NO		72	3.5	4.1	5	TCGA-BC-A10Q-F9852	TCGA-BC-A10Q	TCGA-BC-A10Q-11A		0.5	1		0.7	1.1	0.6	-26400	4437	1135	0			340							2011-04-01	FEMALE		No History of Primary Risk Factors		Hepatocellular Carcinoma	No	C22.0	8170-03-01	C22.0	YES	340
TCGA-BC-A10R-01	TCGA-BC-A10R-01	TCGA-BC-A10R	TCGA Liver Cancer (LIHC)	liver hepatocellular carcinoma	Liver	YES	NO	Mild	66		4		TCGA-BC-A10R-F9867	TCGA-BC-A10R	TCGA-BC-A10R-01A			1		0.7	1.1	0.7	-24274	4316	308	0			199				27			2011-04-01	FEMALE		No History of Primary Risk Factors		Hepatocellular Carcinoma	No	C22.0	8170-03-01	C22.0	YES	180
TCGA-BC-A10R-11	TCGA-BC-A10R-11	TCGA-BC-A10R	TCGA Liver Cancer (LIHC)	liver hepatocellular carcinoma	Liver	YES	NO	Mild	66		4		TCGA-BC-A10R-F9867	TCGA-BC-A10R	TCGA-BC-A10R-11A			1		0.7	1.1	0.7	-24274	4316	308	0			199				27			2011-04-01	FEMALE		No History of Primary Risk Factors		Hepatocellular Carcinoma	No	C22.0	8170-03-01	C22.0	YES	1620
TCGA-BC-A10S-01	TCGA-BC-A10S-01	TCGA-BC-A10S	TCGA Liver Cancer (LIHC)	liver hepatocellular carcinoma	Liver	NO	NO	None	81		3.6		TCGA-BC-A10S-F9875	TCGA-BC-A10S	TCGA-BC-A10S-01A		0.6						-29842	4284	1423	0			1130							2011-04-01	MALE		Alcohol consumption		Hepatocellular Carcinoma	No	C22.0	8170-03-01	C22.0	YES	550
TCGA-BC-A10S-11	TCGA-BC-A10S-11	TCGA-BC-A10S	TCGA Liver Cancer (LIHC)	liver hepatocellular carcinoma	Liver	NO	NO	None	81		3.6		TCGA-BC-A10S-F9875	TCGA-BC-A10S	TCGA-BC-A10S-11A		0.6						-29842	4284	1423	0			1130							2011-04-01	MALE		Alcohol consumption		Hepatocellular Carcinoma	No	C22.0	8170-03-01	C22.0	YES	680
TCGA-BC-A10T-01	TCGA-BC-A10T-01	TCGA-BC-A10T	TCGA Liver Cancer (LIHC)	liver hepatocellular carcinoma	Liver	NO	NO		76		3		TCGA-BC-A10T-F9882	TCGA-BC-A10T	TCGA-BC-A10T-01A		0.7					1.2	-27944	3660	837	0			598					1,2 - Portal Fibrosis		2011-04-01	MALE		No History of Primary Risk Factors		Hepatocellular Carcinoma	No	C22.0	8170-03-01	C22.0	YES	1000
TCGA-BC-A10T-11	TCGA-BC-A10T-11	TCGA-BC-A10T	TCGA Liver Cancer (LIHC)	liver hepatocellular carcinoma	Liver	NO	NO		76		3		TCGA-BC-A10T-F9882	TCGA-BC-A10T	TCGA-BC-A10T-11A		0.7					1.2	-27944	3660	837	0			598					1,2 - Portal Fibrosis		2011-04-01	MALE		No History of Primary Risk Factors		Hepatocellular Carcinoma	No	C22.0	8170-03-01	C22.0	YES	480
TCGA-BC-A10U-01	TCGA-BC-A10U-01	TCGA-BC-A10U	TCGA Liver Cancer (LIHC)	liver hepatocellular carcinoma	Liver	NO	NO		69	3.5	4.3	5	TCGA-BC-A10U-F9923	TCGA-BC-A10U	TCGA-BC-A10U-01A	0	0.4	4		0.8	1.4	0.9	-25305	3645	837	0			586				38			2011-04-04	MALE		Alcohol consumption		Hepatocellular Carcinoma	No	C22.0	8170-03-01	C22.0	YES	510
TCGA-BC-A10U-11	TCGA-BC-A10U-11	TCGA-BC-A10U	TCGA Liver Cancer (LIHC)	liver hepatocellular carcinoma	Liver	NO	NO		69	3.5	4.3	5	TCGA-BC-A10U-F9923	TCGA-BC-A10U	TCGA-BC-A10U-11A	0	0.4	4		0.8	1.4	0.9	-25305	3645	837	0			586				38			2011-04-04	MALE		Alcohol consumption		Hepatocellular Carcinoma	No	C22.0	8170-03-01	C22.0	YES	1130
TCGA-BC-A10W-01	TCGA-BC-A10W-01	TCGA-BC-A10W	TCGA Liver Cancer (LIHC)	liver hepatocellular carcinoma	Liver				50	3.5	2.8	5	TCGA-BC-A10W-F9925	TCGA-BC-A10W	TCGA-BC-A10W-01A	0	1.4	1		0.8	1.4	0.8	-18562	3100	91	0							79			2011-04-04	MALE		Hepatitis B		Hepatocellular Carcinoma	No	C22.0	8170-03-01	C22.0	YES	460
TCGA-BC-A10W-11	TCGA-BC-A10W-11	TCGA-BC-A10W	TCGA Liver Cancer (LIHC)	liver hepatocellular carcinoma	Liver				50	3.5	2.8	5	TCGA-BC-A10W-F9925	TCGA-BC-A10W	TCGA-BC-A10W-11A	0	1.4	1		0.8	1.4	0.8	-18562	3100	91	0							79			2011-04-04	MALE		Hepatitis B		Hepatocellular Carcinoma	No	C22.0	8170-03-01	C22.0	YES	390
TCGA-BC-A10X-01	TCGA-BC-A10X-01	TCGA-BC-A10X	TCGA Liver Cancer (LIHC)	liver hepatocellular carcinoma	Liver			None	52	3.5	3.6	5	TCGA-BC-A10X-F9946	TCGA-BC-A10X	TCGA-BC-A10X-01A	0	0.3	2		0.7	1.1	0.7	-19140	3080	770	0							264			2011-04-04	FEMALE		No History of Primary Risk Factors		Hepatocellular Carcinoma	No	C22.0	8170-03-01	C22.0	YES	520
TCGA-BC-A10X-11	TCGA-BC-A10X-11	TCGA-BC-A10X	TCGA Liver Cancer (LIHC)	liver hepatocellular carcinoma	Liver			None	52	3.5	3.6	5	TCGA-BC-A10X-F9946	TCGA-BC-A10X	TCGA-BC-A10X-11A	0	0.3	2		0.7	1.1	0.7	-19140	3080	770	0							264			2011-04-04	FEMALE		No History of Primary Risk Factors		Hepatocellular Carcinoma	No	C22.0	8170-03-01	C22.0	YES	430
TCGA-BC-A10Y-01	TCGA-BC-A10Y-01	TCGA-BC-A10Y	TCGA Liver Cancer (LIHC)	liver hepatocellular carcinoma	Liver	NO	NO	None	76	3.5	4	5	TCGA-BC-A10Y-F9958	TCGA-BC-A10Y	TCGA-BC-A10Y-01A	0	0.5			0.9	1.4	1	-28049	2961	711	0			400		0	10	10575			2011-04-04	MALE	175	Alcohol consumption		Hepatocellular Carcinoma	No	C22.0	8170-03-01	C22.0	YES	340
TCGA-BC-A10Y-11	TCGA-BC-A10Y-11	TCGA-BC-A10Y	TCGA Liver Cancer (LIHC)	liver hepatocellular carcinoma	Liver	NO	NO	None	76	3.5	4	5	TCGA-BC-A10Y-F9958	TCGA-BC-A10Y		0	0.5			0.9	1.4	1	-28049		711	0			400		0	10	10575			2011-04-04	MALE	175	Alcohol consumption		Hepatocellular Carcinoma	No	C22.0	8170-03-01	C22.0	YES
TCGA-BC-A10Z-01	TCGA-BC-A10Z-01	TCGA-BC-A10Z	TCGA Liver Cancer (LIHC)	liver hepatocellular carcinoma	Liver			None	62	3.5	3.1	5	TCGA-BC-A10Z-F9962	TCGA-BC-A10Z	TCGA-BC-A10Z-01A	0	0.6	1		0.7	1.1	1.2	-22913	2652	34	0					0	10	779			2011-04-04	FEMALE		No History of Primary Risk Factors		Hepatocellular Carcinoma	No	C22.0	8170-03-01	C22.0	YES	160
TCGA-BC-A10Z-11	TCGA-BC-A10Z-11	TCGA-BC-A10Z	TCGA Liver Cancer (LIHC)	liver hepatocellular carcinoma	Liver			None	62	3.5	3.1	5	TCGA-BC-A10Z-F9962	TCGA-BC-A10Z	TCGA-BC-A10Z-11A	0	0.6	1		0.7	1.1	1.2	-22913	2652	34	0					0	10	779			2011-04-04	FEMALE		No History of Primary Risk Factors		Hepatocellular Carcinoma	No	C22.0	8170-03-01	C22.0	YES	160
TCGA-BC-A110-01	TCGA-BC-A110-01	TCGA-BC-A110	TCGA Liver Cancer (LIHC)	liver hepatocellular carcinoma	Liver	NO	NO		51	3.5	3.7	5	TCGA-BC-A110-F9979	TCGA-BC-A110	TCGA-BC-A110-01A	0	0.3	2		0.7	1.1	3.5	-18951	2629	2116	0			2057		0	10				2011-04-04	FEMALE	155	Alcohol consumption		Hepatocellular Carcinoma	No	C22.0	8170-03-01	C22.0	YES	280
TCGA-BC-A110-11	TCGA-BC-A110-11	TCGA-BC-A110	TCGA Liver Cancer (LIHC)	liver hepatocellular carcinoma	Liver	NO	NO		51	3.5	3.7	5	TCGA-BC-A110-F9979	TCGA-BC-A110		0	0.3	2		0.7	1.1	3.5	-18951		2116	0			2057		0	10				2011-04-04	FEMALE	155	Alcohol consumption		Hepatocellular Carcinoma	No	C22.0	8170-03-01	C22.0	YES
TCGA-BC-A112-01	TCGA-BC-A112-01	TCGA-BC-A112	TCGA Liver Cancer (LIHC)	liver hepatocellular carcinoma	Liver				80	3.5	4.1	5	TCGA-BC-A112-F9980	TCGA-BC-A112		0	0.3			0.7	1.3	2.1	-29511		153	0					0	10	233	0 - No Fibrosis		2011-04-04	MALE	165	Alcohol consumption		Hepatocellular Carcinoma	No	C22.0	8170-03-01	C22.0	YES
TCGA-BC-A112-11	TCGA-BC-A112-11	TCGA-BC-A112	TCGA Liver Cancer (LIHC)	liver hepatocellular carcinoma	Liver				80	3.5	4.1	5	TCGA-BC-A112-F9980	TCGA-BC-A112	TCGA-BC-A112-11A	0	0.3			0.7	1.3	2.1	-29511	538	153	0					0	10	233	0 - No Fibrosis		2011-04-04	MALE	165	Alcohol consumption		Hepatocellular Carcinoma	No	C22.0	8170-03-01	C22.0	YES	100
TCGA-BC-A216-01	TCGA-BC-A216-01	TCGA-BC-A216	TCGA Liver Cancer (LIHC)	liver hepatocellular carcinoma	Liver			Mild	62	3.5	3.4	5	TCGA-BC-A216-F22055	TCGA-BC-A216	TCGA-BC-A216-01A	0	0.6	2		0.5	1.5	0.9	-22968	1052		0	1351				0	8	831	0 - No Fibrosis	Scheduled Follow-up Submission	2012-02-23	FEMALE	164	No History of Primary Risk Factors		Hepatocellular Carcinoma	No	C22.0	8170-03-01	C22.0	YES	100
TCGA-BC-A216-11	TCGA-BC-A216-11	TCGA-BC-A216	TCGA Liver Cancer (LIHC)	liver hepatocellular carcinoma	Liver			Mild	62	3.5	3.4	5	TCGA-BC-A216-F22055	TCGA-BC-A216	TCGA-BC-A216-11A	0	0.6	2		0.5	1.5	0.9	-22968	1052		0	1351				0	8	831	0 - No Fibrosis	Scheduled Follow-up Submission	2012-02-23	FEMALE	164	No History of Primary Risk Factors		Hepatocellular Carcinoma	No	C22.0	8170-03-01	C22.0	YES	120
TCGA-BC-A217-01	TCGA-BC-A217-01	TCGA-BC-A217	TCGA Liver Cancer (LIHC)	liver hepatocellular carcinoma	Liver			None	75	3.5	4.4	5	TCGA-BC-A217-F70242	TCGA-BC-A217	TCGA-BC-A217-01A	0	0.2			0.6	1	0.8	-27411	408	1397	0	421				0	10	28	0 - No Fibrosis		2015-02-02	FEMALE	163	Alcohol consumption		Hepatocellular Carcinoma	No	C22.0	8170-03-01	C22.0	YES	240
TCGA-BC-A3KF-01	TCGA-BC-A3KF-01	TCGA-BC-A3KF	TCGA Liver Cancer (LIHC)	liver hepatocellular carcinoma	Liver				66				TCGA-BC-A3KF-F38204	TCGA-BC-A3KF	TCGA-BC-A3KF-01A			2		0.6	1	0.8	-24328	91		0	8									2012-12-11	FEMALE	173	No History of Primary Risk Factors		Hepatocellular Carcinoma	No	C22.0	8170-03-01	C22.0	YES	340
TCGA-BC-A3KG-01	TCGA-BC-A3KG-01	TCGA-BC-A3KG	TCGA Liver Cancer (LIHC)	liver hepatocellular carcinoma	Liver	YES			68	3.5	3.6	5	TCGA-BC-A3KG-F38205	TCGA-BC-A3KG	TCGA-BC-A3KG-01A	0	0.5			0.6	1	0.7	-25061	140		0	680		209		0	10	618			2013-06-27	FEMALE	159	Alcohol consumption		Hepatocellular Carcinoma	No	C22.0	8170-03-01	C22.0	YES	790
TCGA-BC-A5W4-01	TCGA-BC-A5W4-01	TCGA-BC-A5W4	TCGA Liver Cancer (LIHC)	liver hepatocellular carcinoma	Liver	NO	NO	None	69	3.5	4.2	5	TCGA-BC-A5W4-F57584	TCGA-BC-A5W4	TCGA-BC-A5W4-01A	0	0.6		A	0.7	1.3		-25503	224	547	0	289		384							2014-03-17	MALE	183	Alcohol consumption		Hepatocellular Carcinoma	No	C22.0	8170-03-01	C22.0	YES	540	9.9	13
TCGA-BC-A69H-01	TCGA-BC-A69H-01	TCGA-BC-A69H	TCGA Liver Cancer (LIHC)	liver hepatocellular carcinoma	Liver			None	64	3.6	4.3	4.8	TCGA-BC-A69H-F59404	TCGA-BC-A69H	TCGA-BC-A69H-01A	0	0.4		A	0.8	1.3	0.8	-23380	94		0	444			1	0		103900			2014-05-12	MALE	173	Alcohol consumption		Hepatocellular Carcinoma	No	C22.0	8170-03-01	C22.0	YES	610	9.1	12
TCGA-BC-A69I-01	TCGA-BC-A69I-01	TCGA-BC-A69I	TCGA Liver Cancer (LIHC)	liver hepatocellular carcinoma	Liver			None	69				TCGA-BC-A69I-F59405	TCGA-BC-A69I	TCGA-BC-A69I-01A	0	1.2	1		0.7	1.3	1.2	-25370	80		0	387			0	0	10	2			2014-05-12	MALE	180	No History of Primary Risk Factors		Hepatocellular Carcinoma	No	C22.0	8170-03-01	C22.0	YES	500	9.9	13
TCGA-BC-A8YO-01	TCGA-BC-A8YO-01	TCGA-BC-A8YO	TCGA Liver Cancer (LIHC)	liver hepatocellular carcinoma	Liver			None	66	3.5	4.3	5	TCGA-BC-A8YO-F70635	TCGA-BC-A8YO	TCGA-BC-A8YO-01A	0	0.3	3		0.6	1	0.8	-24189	141		0	562									2015-02-26	FEMALE	170	Alcohol consumption|Other	Chronic hepatitis, either viral or autoimmune	Hepatocellular Carcinoma	No	C22.0	8170-03-01	C22.0	YES	680
TCGA-BD-A2L6-01	TCGA-BD-A2L6-01	TCGA-BD-A2L6	TCGA Liver Cancer (LIHC)	liver hepatocellular carcinoma	Liver	YES	NO	None	69	3.4	3.7	5	TCGA-BD-A2L6-F34562	TCGA-BD-A2L6	TCGA-BD-A2L6-01A	0.3	0.9		A	0.5	1.4	1.2	-25489	148		0	1363		415	1	0	20	53	3,4 - Fibrous Speta		2012-08-23	MALE	168	Alcohol consumption		Hepatocellular Carcinoma	No	C22.0	8170-03-01	C22.0	YES	480	0.8	1.2
TCGA-BD-A2L6-11	TCGA-BD-A2L6-11	TCGA-BD-A2L6	TCGA Liver Cancer (LIHC)	liver hepatocellular carcinoma	Liver	YES	NO	None	69	3.4	3.7	5	TCGA-BD-A2L6-F34562	TCGA-BD-A2L6	TCGA-BD-A2L6-11A	0.3	0.9		A	0.5	1.4	1.2	-25489	148		0	1363		415	1	0	20	53	3,4 - Fibrous Speta		2012-08-23	MALE	168	Alcohol consumption		Hepatocellular Carcinoma	No	C22.0	8170-03-01	C22.0	YES	310	0.8	1.2
TCGA-BD-A3EP-01	TCGA-BD-A3EP-01	TCGA-BD-A3EP	TCGA Liver Cancer (LIHC)	liver hepatocellular carcinoma	Liver			Mild	75	3.4	3.8	5	TCGA-BD-A3EP-F68680	TCGA-BD-A3EP	TCGA-BD-A3EP-01A	0.3	0.6	0	A	0.5	1.4	1.1	-27756	398		0	409			1	0	20	17	1,2 - Portal Fibrosis		2014-12-10	FEMALE	168	No History of Primary Risk Factors		Hepatocellular Carcinoma	No	C22.0	8170-03-01	C22.0	YES	140	0.8	1.2
TCGA-BD-A3EP-11	TCGA-BD-A3EP-11	TCGA-BD-A3EP	TCGA Liver Cancer (LIHC)	liver hepatocellular carcinoma	Liver			Mild	75	3.4	3.8	5	TCGA-BD-A3EP-F68680	TCGA-BD-A3EP	TCGA-BD-A3EP-11A	0.3	0.6	0	A	0.5	1.4	1.1	-27756	398		0	409			1	0	20	17	1,2 - Portal Fibrosis		2014-12-10	FEMALE	168	No History of Primary Risk Factors		Hepatocellular Carcinoma	No	C22.0	8170-03-01	C22.0	YES	120	0.8	1.2
TCGA-BD-A3ER-01	TCGA-BD-A3ER-01	TCGA-BD-A3ER	TCGA Liver Cancer (LIHC)	liver hepatocellular carcinoma	Liver	NO	NO	Mild	62	3.4	3.9	5	TCGA-BD-A3ER-F68681	TCGA-BD-A3ER	TCGA-BD-A3ER-01A	0.3	0.7	0	A	0.5	1.4	0.9	-22657	23		0	1115		226	0	0	20	5	6 - Established Cirrhosis		2014-12-10	MALE	188	Hemochromatosis	Alcohol Consumption	Hepatocellular Carcinoma	No	C22.0	8170-03-01	C22.0	YES	90	0.8	1.2
TCGA-BW-A5NO-01	TCGA-BW-A5NO-01	TCGA-BW-A5NO	TCGA Liver Cancer (LIHC)	liver hepatocellular carcinoma	Liver				50					TCGA-BW-A5NO	TCGA-BW-A5NO-01A								-18510	840		0	20			1				3,4 - Fibrous Speta		2014-03-26	MALE		Hepatitis C		Hepatocellular Carcinoma	No	C22.0	8170-03-01	C22.0	YES	110
TCGA-BW-A5NP-01	TCGA-BW-A5NP-01	TCGA-BW-A5NP	TCGA Liver Cancer (LIHC)	liver hepatocellular carcinoma	Liver			Mild	26					TCGA-BW-A5NP	TCGA-BW-A5NP-01A								-9809	1057		0	0			2			143684	3,4 - Fibrous Speta		2014-03-26	FEMALE		Hepatitis B		Hepatocellular Carcinoma	No	C22.0	8170-03-01	C22.0	YES	290
TCGA-BW-A5NQ-01	TCGA-BW-A5NQ-01	TCGA-BW-A5NQ	TCGA Liver Cancer (LIHC)	liver hepatocellular carcinoma	Liver				63					TCGA-BW-A5NQ	TCGA-BW-A5NQ-01A								-23353	1022		0	0							6 - Established Cirrhosis		2014-03-26	MALE		Alcohol consumption|Other	cirrhosis	Hepatocellular Carcinoma	No	C22.0	8170-03-01	C22.0	YES	160
TCGA-CC-5258-01	TCGA-CC-5258-01	TCGA-CC-5258	TCGA Liver Cancer (LIHC)	liver hepatocellular carcinoma	Liver				48				TCGA-CC-5258-F20327	TCGA-CC-5258	TCGA-CC-5258-01A								-17586	147	129	0	0			3					Scheduled Follow-up Submission	2012-01-09	MALE				Hepatocellular Carcinoma	No	C22.0	8170-03-01	C22.0	YES	1700
TCGA-CC-5259-01	TCGA-CC-5259-01	TCGA-CC-5259	TCGA Liver Cancer (LIHC)	liver hepatocellular carcinoma	Liver	NO	NO		60				TCGA-CC-5259-F70915	TCGA-CC-5259									-21946			0	250		180							2015-03-10	FEMALE	153	No History of Primary Risk Factors		Hepatocellular Carcinoma	No	C22.0	8170-03-01	C22.0	YES
TCGA-CC-5260-01	TCGA-CC-5260-01	TCGA-CC-5260	TCGA Liver Cancer (LIHC)	liver hepatocellular carcinoma	Liver				61				TCGA-CC-5260-F20330	TCGA-CC-5260	TCGA-CC-5260-01A								-22345	105	87	0	0								Scheduled Follow-up Submission	2012-01-09	FEMALE	153			Hepatocellular Carcinoma	No	C22.0	8170-03-01	C22.0	YES	600
TCGA-CC-5261-01	TCGA-CC-5261-01	TCGA-CC-5261	TCGA Liver Cancer (LIHC)	liver hepatocellular carcinoma	Liver				44				TCGA-CC-5261-F20332	TCGA-CC-5261	TCGA-CC-5261-01A								-16373	110	97	0	12								Scheduled Follow-up Submission	2012-01-09	MALE	175			Hepatocellular Carcinoma	No	C22.0	8170-03-01	C22.0	YES	450
TCGA-CC-5262-01	TCGA-CC-5262-01	TCGA-CC-5262	TCGA Liver Cancer (LIHC)	liver hepatocellular carcinoma	Liver				67				TCGA-CC-5262-F20334	TCGA-CC-5262	TCGA-CC-5262-01A								-24787	97	103	0	0								Scheduled Follow-up Submission	2012-01-09	MALE	170	No History of Primary Risk Factors		Hepatocellular Carcinoma	No	C22.0	8170-03-01	C22.0	YES	800
TCGA-CC-5263-01	TCGA-CC-5263-01	TCGA-CC-5263	TCGA Liver Cancer (LIHC)	liver hepatocellular carcinoma	Liver				35				TCGA-CC-5263-F20328	TCGA-CC-5263	TCGA-CC-5263-01A								-12863	91	129	0									Scheduled Follow-up Submission	2012-01-09	MALE	163	No History of Primary Risk Factors		Hepatocellular Carcinoma	No	C22.0	8170-03-01	C22.0	YES	900
TCGA-CC-5264-01	TCGA-CC-5264-01	TCGA-CC-5264	TCGA Liver Cancer (LIHC)	liver hepatocellular carcinoma	Liver				71				TCGA-CC-5264-F20329	TCGA-CC-5264	TCGA-CC-5264-01A								-25979	84	102	0	0								Scheduled Follow-up Submission	2012-01-09	MALE	160			Hepatocellular Carcinoma	No	C22.0	8170-03-01	C22.0	YES	550
TCGA-CC-A123-01	TCGA-CC-A123-01	TCGA-CC-A123	TCGA Liver Cancer (LIHC)	liver hepatocellular carcinoma	Liver	NO	NO		24				TCGA-CC-A123-F70913	TCGA-CC-A123	TCGA-CC-A123-01A								-9107	49		0	219		145	3						2015-03-10	FEMALE				Hepatocellular Carcinoma	No	C22.0	8170-03-01	C22.0	YES	280
TCGA-CC-A1HT-01	TCGA-CC-A1HT-01	TCGA-CC-A1HT	TCGA Liver Cancer (LIHC)	liver hepatocellular carcinoma	Liver				50				TCGA-CC-A1HT-F20333	TCGA-CC-A1HT	TCGA-CC-A1HT-01A								-18553	86	101	0	0			4					Scheduled Follow-up Submission	2012-01-09	MALE	163	No History of Primary Risk Factors		Hepatocellular Carcinoma	No	C22.0	8170-03-01	C22.0	YES	470
TCGA-CC-A3M9-01	TCGA-CC-A3M9-01	TCGA-CC-A3M9	TCGA Liver Cancer (LIHC)	liver hepatocellular carcinoma	Liver	NO	NO		45				TCGA-CC-A3M9-F70909	TCGA-CC-A3M9	TCGA-CC-A3M9-01A								-16460	226	300	0	3		219	2						2015-03-10	MALE	174	Alcohol consumption		Hepatocellular Carcinoma	No	C22.0	8173-03-01	C22.0	YES	200
TCGA-CC-A3MA-01	TCGA-CC-A3MA-01	TCGA-CC-A3MA	TCGA Liver Cancer (LIHC)	liver hepatocellular carcinoma	Liver	NO	NO		61				TCGA-CC-A3MA-F70907	TCGA-CC-A3MA	TCGA-CC-A3MA-01A								-22375	177	303	0	2		261	3						2015-03-10	MALE	168	Alcohol consumption		Hepatocellular Carcinoma	No	C22.0	8170-03-01	C22.0	YES	530
TCGA-CC-A3MB-01	TCGA-CC-A3MB-01	TCGA-CC-A3MB	TCGA Liver Cancer (LIHC)	liver hepatocellular carcinoma	Liver	NO	NO		36				TCGA-CC-A3MB-F70908	TCGA-CC-A3MB	TCGA-CC-A3MB-01A								-13255	205	315	0	3		260	3						2015-03-10	MALE	176	No History of Primary Risk Factors		Hepatocellular Carcinoma	No	C22.0	8170-03-01	C22.0	YES	460
TCGA-CC-A3MC-01	TCGA-CC-A3MC-01	TCGA-CC-A3MC	TCGA Liver Cancer (LIHC)	liver hepatocellular carcinoma	Liver	NO	NO		54				TCGA-CC-A3MC-F70912	TCGA-CC-A3MC	TCGA-CC-A3MC-01A								-20067	268		0	363		297	3						2015-03-10	MALE	163	Alcohol consumption		Hepatocellular Carcinoma	No	C22.0	8170-03-01	C22.0	YES	400
TCGA-CC-A5UC-01	TCGA-CC-A5UC-01	TCGA-CC-A5UC	TCGA Liver Cancer (LIHC)	liver hepatocellular carcinoma	Liver	NO	NO		63				TCGA-CC-A5UC-F69917	TCGA-CC-A5UC	TCGA-CC-A5UC-01A								-23156	99	347	0	0		312	2						2015-01-22	MALE	165	Alcohol consumption		Hepatocellular Carcinoma	No	C22.0	8170-03-01	C22.0	YES	210
TCGA-CC-A5UD-01	TCGA-CC-A5UD-01	TCGA-CC-A5UD	TCGA Liver Cancer (LIHC)	liver hepatocellular carcinoma	Liver	NO	NO		45				TCGA-CC-A5UD-F69700	TCGA-CC-A5UD	TCGA-CC-A5UD-01A								-16702	92	304	0	0		182	1						2015-01-16	MALE	170	Alcohol consumption		Hepatocellular Carcinoma	No	C22.0	8170-03-01	C22.0	YES	310
TCGA-CC-A5UE-01	TCGA-CC-A5UE-01	TCGA-CC-A5UE	TCGA Liver Cancer (LIHC)	liver hepatocellular carcinoma	Liver	NO	NO		48				TCGA-CC-A5UE-F69701	TCGA-CC-A5UE	TCGA-CC-A5UE-01A								-17805	85	272	0	0		175	3						2015-01-16	MALE	175	Alcohol consumption		Hepatocellular Carcinoma	No	C22.0	8170-03-01	C22.0	YES	300
TCGA-CC-A7IE-01	TCGA-CC-A7IE-01	TCGA-CC-A7IE	TCGA Liver Cancer (LIHC)	liver hepatocellular carcinoma	Liver	NO	NO		57				TCGA-CC-A7IE-F69923	TCGA-CC-A7IE									-20985		217	0	0		169	3						2015-01-22	MALE	172	Alcohol consumption		Hepatocellular Carcinoma	No	C22.0	8170-03-01	C22.0	YES
TCGA-CC-A7IF-01	TCGA-CC-A7IF-01	TCGA-CC-A7IF	TCGA Liver Cancer (LIHC)	liver hepatocellular carcinoma	Liver	NO	NO		59				TCGA-CC-A7IF-F69922	TCGA-CC-A7IF	TCGA-CC-A7IF-01A								-21845	236	649	0	0		254	3						2015-01-22	MALE	169	Alcohol consumption		Hepatocellular Carcinoma	No	C22.0	8170-03-01	C22.0	YES	380
TCGA-CC-A7IG-01	TCGA-CC-A7IG-01	TCGA-CC-A7IG	TCGA Liver Cancer (LIHC)	liver hepatocellular carcinoma	Liver	NO	NO		47				TCGA-CC-A7IG-F69702	TCGA-CC-A7IG	TCGA-CC-A7IG-01A								-17453	239	299	0	0		195	2						2015-01-16	MALE	174	Alcohol consumption		Hepatocellular Carcinoma	No	C22.0	8170-03-01	C22.0	YES	210
TCGA-CC-A7IH-01	TCGA-CC-A7IH-01	TCGA-CC-A7IH	TCGA Liver Cancer (LIHC)	liver hepatocellular carcinoma	Liver				58				TCGA-CC-A7IH-F69920	TCGA-CC-A7IH	TCGA-CC-A7IH-01A								-21381	181		0	365			3						2015-01-22	MALE	175	Alcohol consumption		Hepatocellular Carcinoma	No	C22.0	8170-03-01	C22.0	YES	190
TCGA-CC-A7II-01	TCGA-CC-A7II-01	TCGA-CC-A7II	TCGA Liver Cancer (LIHC)	liver hepatocellular carcinoma	Liver	NO	NO		54				TCGA-CC-A7II-F69918	TCGA-CC-A7II	TCGA-CC-A7II-01A								-20079	169		0	399		278	2						2015-01-22	MALE	168	Alcohol consumption		Hepatocellular Carcinoma	No	C22.0	8170-03-01	C22.0	YES	400
TCGA-CC-A7IJ-01	TCGA-CC-A7IJ-01	TCGA-CC-A7IJ	TCGA Liver Cancer (LIHC)	liver hepatocellular carcinoma	Liver				56				TCGA-CC-A7IJ-F69704	TCGA-CC-A7IJ	TCGA-CC-A7IJ-01A								-20751	168		0	382			2						2015-01-16	MALE	165	Alcohol consumption		Hepatocellular Carcinoma	No	C22.0	8170-03-01	C22.0	YES	270
TCGA-CC-A7IK-01	TCGA-CC-A7IK-01	TCGA-CC-A7IK	TCGA Liver Cancer (LIHC)	liver hepatocellular carcinoma	Liver	NO	NO		59				TCGA-CC-A7IK-F69705	TCGA-CC-A7IK	TCGA-CC-A7IK-01A								-21552	163	262	0	0		150	2						2015-01-16	MALE	168	Alcohol consumption		Hepatocellular Carcinoma	No	C22.0	8170-03-01	C22.0	YES	470
TCGA-CC-A7IL-01	TCGA-CC-A7IL-01	TCGA-CC-A7IL	TCGA Liver Cancer (LIHC)	liver hepatocellular carcinoma	Liver	NO	NO		61				TCGA-CC-A7IL-F69706	TCGA-CC-A7IL	TCGA-CC-A7IL-01A								-22319	161	278	0	0		179	2						2015-01-16	MALE	174	Alcohol consumption		Hepatocellular Carcinoma	No	C22.0	8170-03-01	C22.0	YES	230
TCGA-CC-A8HS-01	TCGA-CC-A8HS-01	TCGA-CC-A8HS	TCGA Liver Cancer (LIHC)	liver hepatocellular carcinoma	Liver	NO	NO		18				TCGA-CC-A8HS-F69707	TCGA-CC-A8HS	TCGA-CC-A8HS-01A								-6617	223	300	0	0		201	3						2015-01-16	MALE	172	No History of Primary Risk Factors		Hepatocellular Carcinoma	No	C22.0	8170-03-01	C22.0	YES	240
TCGA-CC-A8HT-01	TCGA-CC-A8HT-01	TCGA-CC-A8HT	TCGA Liver Cancer (LIHC)	liver hepatocellular carcinoma	Liver	NO	NO		74				TCGA-CC-A8HT-F69842	TCGA-CC-A8HT	TCGA-CC-A8HT-01A								-27334	197	140	0	0		83	4						2015-01-21	MALE	159	Alcohol consumption		Hepatocellular Carcinoma	No	C22.0	8170-03-01	C22.0	YES	170
TCGA-CC-A8HU-01	TCGA-CC-A8HU-01	TCGA-CC-A8HU	TCGA Liver Cancer (LIHC)	liver hepatocellular carcinoma	Liver	NO	NO		39				TCGA-CC-A8HU-F69708	TCGA-CC-A8HU	TCGA-CC-A8HU-01A								-14367	141	344	0	0		301	3						2015-01-16	FEMALE	163	No History of Primary Risk Factors		Hepatocellular Carcinoma	No	C22.0	8170-03-01	C22.0	YES	360
TCGA-CC-A8HV-01	TCGA-CC-A8HV-01	TCGA-CC-A8HV	TCGA Liver Cancer (LIHC)	liver hepatocellular carcinoma	Liver	YES	NO		51				TCGA-CC-A8HV-F69784	TCGA-CC-A8HV	TCGA-CC-A8HV-01A								-18935	140	279	0	0		149	2						2015-01-19	FEMALE	159	No History of Primary Risk Factors		Hepatocellular Carcinoma	No	C22.0	8170-03-01	C22.0	YES	230
TCGA-CC-A9FS-01	TCGA-CC-A9FS-01	TCGA-CC-A9FS	TCGA Liver Cancer (LIHC)	liver hepatocellular carcinoma	Liver	NO	NO		55				TCGA-CC-A9FS-F69914	TCGA-CC-A9FS									-20157			0	211		109	2						2015-01-22	MALE	174	Alcohol consumption		Hepatocellular Carcinoma	No	C22.0	8170-03-01	C22.0	YES
TCGA-CC-A9FU-01	TCGA-CC-A9FU-01	TCGA-CC-A9FU	TCGA Liver Cancer (LIHC)	liver hepatocellular carcinoma	Liver				52					TCGA-CC-A9FU	TCGA-CC-A9FU-01A								-19326	205		0	0									2014-08-22	FEMALE	153	Hepatitis B		Hepatocellular Carcinoma	No	C22.0	8170-03-01	C22.0	YES	220
TCGA-CC-A9FV-01	TCGA-CC-A9FV-01	TCGA-CC-A9FV	TCGA Liver Cancer (LIHC)	liver hepatocellular carcinoma	Liver				57					TCGA-CC-A9FV	TCGA-CC-A9FV-01A								-21044	184		0	0									2014-08-22	MALE	165	Alcohol consumption		Hepatocellular Carcinoma	No	C22.0	8170-03-01	C22.0	YES	420
TCGA-CC-A9FW-01	TCGA-CC-A9FW-01	TCGA-CC-A9FW	TCGA Liver Cancer (LIHC)	liver hepatocellular carcinoma	Liver	NO	NO		68				TCGA-CC-A9FW-F69912	TCGA-CC-A9FW									-24891			0	248		153	3						2015-01-22	MALE	175	Alcohol consumption		Hepatocellular Carcinoma	No	C22.0	8170-03-01	C22.0	YES
TCGA-DD-A113-01	TCGA-DD-A113-01	TCGA-DD-A113	TCGA Liver Cancer (LIHC)	liver hepatocellular carcinoma	Liver	NO	NO	None	55	3.5	4.3	5	TCGA-DD-A113-F38777	TCGA-DD-A113	TCGA-DD-A113-01A	0.1	0.5		A	0.7	1.2	0.8	-20188	1650		0	2425	1678	1676	1	0	6	133	0 - No Fibrosis		2012-12-21	FEMALE	154	Other	Smoking	Hepatocellular Carcinoma	No	C22.0	8170-03-01	C22.0	YES	110	0.9	1.2
TCGA-DD-A113-11	TCGA-DD-A113-11	TCGA-DD-A113	TCGA Liver Cancer (LIHC)	liver hepatocellular carcinoma	Liver	NO	NO	None	55	3.5	4.3	5	TCGA-DD-A113-F38777	TCGA-DD-A113		0.1	0.5		A	0.7	1.2	0.8	-20188			0	2425	1678	1676	1	0	6	133	0 - No Fibrosis		2012-12-21	FEMALE	154	Other	Smoking	Hepatocellular Carcinoma	No	C22.0	8170-03-01	C22.0	YES		0.9	1.2
TCGA-DD-A114-01	TCGA-DD-A114-01	TCGA-DD-A114	TCGA Liver Cancer (LIHC)	liver hepatocellular carcinoma	Liver			Mild	42	3.5	3.5	5	TCGA-DD-A114-F38779	TCGA-DD-A114	TCGA-DD-A114-01A	0.1	2.5		A	0.9	1.4	1.2	-15410	2063	1149	0				1	0	6	21	5 - Nodular Formation and Incomplete Cirrhosis		2012-12-21	MALE	173	Hepatitis C		Hepatocellular Carcinoma	No	C22.0	8170-03-01	C22.0	YES	250	0.9	1.2
TCGA-DD-A114-11	TCGA-DD-A114-11	TCGA-DD-A114	TCGA Liver Cancer (LIHC)	liver hepatocellular carcinoma	Liver			Mild	42	3.5	3.5	5	TCGA-DD-A114-F38779	TCGA-DD-A114		0.1	2.5		A	0.9	1.4	1.2	-15410		1149	0				1	0	6	21	5 - Nodular Formation and Incomplete Cirrhosis		2012-12-21	MALE	173	Hepatitis C		Hepatocellular Carcinoma	No	C22.0	8170-03-01	C22.0	YES		0.9	1.2
TCGA-DD-A115-01	TCGA-DD-A115-01	TCGA-DD-A115	TCGA Liver Cancer (LIHC)	liver hepatocellular carcinoma	Liver	YES	NO	None	53	3.5	4.1	5	TCGA-DD-A115-F38780	TCGA-DD-A115	TCGA-DD-A115-01A	0.1	0.6		A	0.1	1.2	1.1	-19697	3198	2542	0			469	0	0	6	10	0 - No Fibrosis		2012-12-21	MALE	168	Alcohol consumption	Smoking	Hepatocellular Carcinoma	No	C22.0	8170-03-01	C22.0	YES	230
TCGA-DD-A115-11	TCGA-DD-A115-11	TCGA-DD-A115	TCGA Liver Cancer (LIHC)	liver hepatocellular carcinoma	Liver	YES	NO	None	53	3.5	4.1	5	TCGA-DD-A115-F38780	TCGA-DD-A115	TCGA-DD-A115-11A	0.1	0.6		A	0.1	1.2	1.1	-19697	3198	2542	0			469	0	0	6	10	0 - No Fibrosis		2012-12-21	MALE	168	Alcohol consumption	Smoking	Hepatocellular Carcinoma	No	C22.0	8170-03-01	C22.0	YES	170
TCGA-DD-A116-01	TCGA-DD-A116-01	TCGA-DD-A116	TCGA Liver Cancer (LIHC)	liver hepatocellular carcinoma	Liver	NO	YES		68	3.5	4.1	5	TCGA-DD-A116-F38781	TCGA-DD-A116	TCGA-DD-A116-01A	0.1	1.1	0	A	0.8	1.4	1.1	-24934	3208	1622	0		1023	828	1	0	6	24	3,4 - Fibrous Speta		2012-12-21	MALE	175	Hepatitis B		Hepatocellular Carcinoma	No	C22.0	8170-03-01	C22.0	YES	170
TCGA-DD-A116-11	TCGA-DD-A116-11	TCGA-DD-A116	TCGA Liver Cancer (LIHC)	liver hepatocellular carcinoma	Liver	NO	YES		68	3.5	4.1	5	TCGA-DD-A116-F38781	TCGA-DD-A116	TCGA-DD-A116-11A	0.1	1.1	0	A	0.8	1.4	1.1	-24934	3208	1622	0		1023	828	1	0	6	24	3,4 - Fibrous Speta		2012-12-21	MALE	175	Hepatitis B		Hepatocellular Carcinoma	No	C22.0	8170-03-01	C22.0	YES	170
TCGA-DD-A118-01	TCGA-DD-A118-01	TCGA-DD-A118	TCGA Liver Cancer (LIHC)	liver hepatocellular carcinoma	Liver	NO	NO	None	77	3.4	3.4	4.8	TCGA-DD-A118-F38782	TCGA-DD-A118	TCGA-DD-A118-01A	0.1	0.5		A	0.7	1.2	0.9	-28406	2854		0	3437	659	658	1	0	6	85150	0 - No Fibrosis		2012-12-21	FEMALE	169			Hepatocellular Carcinoma	No	C22.0	8170-03-01	C22.0	YES	30
TCGA-DD-A118-11	TCGA-DD-A118-11	TCGA-DD-A118	TCGA Liver Cancer (LIHC)	liver hepatocellular carcinoma	Liver	NO	NO	None	77	3.4	3.4	4.8	TCGA-DD-A118-F38782	TCGA-DD-A118	TCGA-DD-A118-11A	0.1	0.5		A	0.7	1.2	0.9	-28406	2854		0	3437	659	658	1	0	6	85150	0 - No Fibrosis		2012-12-21	FEMALE	169			Hepatocellular Carcinoma	No	C22.0	8170-03-01	C22.0	YES	60
TCGA-DD-A119-01	TCGA-DD-A119-01	TCGA-DD-A119	TCGA Liver Cancer (LIHC)	liver hepatocellular carcinoma	Liver			None	40	3.5	3.9	5	TCGA-DD-A119-F38783	TCGA-DD-A119	TCGA-DD-A119-01A	0.1	1.6	2	A	0.9	1.4	1.3	-14613	2738	223	0				1	0	6	1836	0 - No Fibrosis		2012-12-21	MALE	160	Hepatitis B		Hepatocellular Carcinoma	No	C22.0	8170-03-01	C22.0	YES	160
TCGA-DD-A119-11	TCGA-DD-A119-11	TCGA-DD-A119	TCGA Liver Cancer (LIHC)	liver hepatocellular carcinoma	Liver			None	40	3.5	3.9	5	TCGA-DD-A119-F38783	TCGA-DD-A119		0.1	1.6	2	A	0.9	1.4	1.3	-14613		223	0				1	0	6	1836	0 - No Fibrosis		2012-12-21	MALE	160	Hepatitis B		Hepatocellular Carcinoma	No	C22.0	8170-03-01	C22.0	YES
TCGA-DD-A11A-01	TCGA-DD-A11A-01	TCGA-DD-A11A	TCGA Liver Cancer (LIHC)	liver hepatocellular carcinoma	Liver			None	67				TCGA-DD-A11A-F38784	TCGA-DD-A11A	TCGA-DD-A11A-01A	0.1	3.6			0.9	1.4	1.1	-24646	2184		0	79			0	0	6	223	0 - No Fibrosis		2012-12-21	MALE	156	Other	HBcAB total (+), HBsAg (-), HBcIgm Ab (-)	Hepatocellular Carcinoma	No	C22.0	8170-03-01	C22.0	YES	260
TCGA-DD-A11A-11	TCGA-DD-A11A-11	TCGA-DD-A11A	TCGA Liver Cancer (LIHC)	liver hepatocellular carcinoma	Liver			None	67				TCGA-DD-A11A-F38784	TCGA-DD-A11A	TCGA-DD-A11A-11A	0.1	3.6			0.9	1.4	1.1	-24646	2184		0	79			0	0	6	223	0 - No Fibrosis		2012-12-21	MALE	156	Other	HBcAB total (+), HBsAg (-), HBcIgm Ab (-)	Hepatocellular Carcinoma	No	C22.0	8170-03-01	C22.0	YES	240
TCGA-DD-A11B-01	TCGA-DD-A11B-01	TCGA-DD-A11B	TCGA Liver Cancer (LIHC)	liver hepatocellular carcinoma	Liver			Mild	73	3.5	3.9	5	TCGA-DD-A11B-F38785	TCGA-DD-A11B	TCGA-DD-A11B-01A	0.1	1.6		A	0.9	1.4	1	-26857	1975	14	0				1	0	6	15	6 - Established Cirrhosis		2012-12-21	MALE	181	Non-Alcoholic Fatty Liver Disease		Hepatocellular Carcinoma	No	C22.0	8170-03-01	C22.0	YES	280	8.4	12
TCGA-DD-A11B-11	TCGA-DD-A11B-11	TCGA-DD-A11B	TCGA Liver Cancer (LIHC)	liver hepatocellular carcinoma	Liver			Mild	73	3.5	3.9	5	TCGA-DD-A11B-F38785	TCGA-DD-A11B	TCGA-DD-A11B-11A	0.1	1.6		A	0.9	1.4	1	-26857	1975	14	0				1	0	6	15	6 - Established Cirrhosis		2012-12-21	MALE	181	Non-Alcoholic Fatty Liver Disease		Hepatocellular Carcinoma	No	C22.0	8170-03-01	C22.0	YES	320	8.4	12
TCGA-DD-A11C-01	TCGA-DD-A11C-01	TCGA-DD-A11C	TCGA Liver Cancer (LIHC)	liver hepatocellular carcinoma	Liver			None	69	3.5	3.6	5	TCGA-DD-A11C-F38786	TCGA-DD-A11C	TCGA-DD-A11C-01A	0.1	2.3	1	A	0.9	1.4	0.9	-25403	1703		0	662			1	0	6	11	0 - No Fibrosis		2012-12-21	MALE	186			Hepatocellular Carcinoma	No	C22.0	8170-03-01	C22.0	YES	220
TCGA-DD-A11C-11	TCGA-DD-A11C-11	TCGA-DD-A11C	TCGA Liver Cancer (LIHC)	liver hepatocellular carcinoma	Liver			None	69	3.5	3.6	5	TCGA-DD-A11C-F38786	TCGA-DD-A11C		0.1	2.3	1	A	0.9	1.4	0.9	-25403			0	662			1	0	6	11	0 - No Fibrosis		2012-12-21	MALE	186			Hepatocellular Carcinoma	No	C22.0	8170-03-01	C22.0	YES
TCGA-DD-A11D-01	TCGA-DD-A11D-01	TCGA-DD-A11D	TCGA Liver Cancer (LIHC)	liver hepatocellular carcinoma	Liver	YES	NO	None	57	3.5	4.5	5	TCGA-DD-A11D-F38787	TCGA-DD-A11D	TCGA-DD-A11D-01A	0.1	0.5	2	A	0.6	1.1	1.1	-21003	1731	1560	0			498	1	0	6	8	6 - Established Cirrhosis		2012-12-21	FEMALE	163	Non-Alcoholic Fatty Liver Disease		Hepatocellular Carcinoma	No	C22.0	8170-03-01	C22.0	YES	300	0.9	1.2
TCGA-DD-A11D-11	TCGA-DD-A11D-11	TCGA-DD-A11D	TCGA Liver Cancer (LIHC)	liver hepatocellular carcinoma	Liver	YES	NO	None	57	3.5	4.5	5	TCGA-DD-A11D-F38787	TCGA-DD-A11D	TCGA-DD-A11D-11A	0.1	0.5	2	A	0.6	1.1	1.1	-21003	1731	1560	0			498	1	0	6	8	6 - Established Cirrhosis		2012-12-21	FEMALE	163	Non-Alcoholic Fatty Liver Disease		Hepatocellular Carcinoma	No	C22.0	8170-03-01	C22.0	YES	240	0.9	1.2
TCGA-DD-A1E9-01	TCGA-DD-A1E9-01	TCGA-DD-A1E9	TCGA Liver Cancer (LIHC)	liver hepatocellular carcinoma	Liver	NO	NO	Severe	70	3.5	4.1	5	TCGA-DD-A1E9-F42012	TCGA-DD-A1E9	TCGA-DD-A1E9-01A	0.1	13	4	A	0.8	1.3	0.9	-25808	3234	2759	0			720	1	0	6	202	6 - Established Cirrhosis		2013-04-09	MALE	172	Alcohol consumption		Hepatocellular Carcinoma	No	C22.0	8170-03-01	C22.0	YES	100	8.4	12
TCGA-DD-A1E9-11	TCGA-DD-A1E9-11	TCGA-DD-A1E9	TCGA Liver Cancer (LIHC)	liver hepatocellular carcinoma	Liver	NO	NO	Severe	70	3.5	4.1	5	TCGA-DD-A1E9-F42012	TCGA-DD-A1E9	TCGA-DD-A1E9-11A	0.1	13	4	A	0.8	1.3	0.9	-25808	3234	2759	0			720	1	0	6	202	6 - Established Cirrhosis		2013-04-09	MALE	172	Alcohol consumption		Hepatocellular Carcinoma	No	C22.0	8170-03-01	C22.0	YES	120	8.4	12
TCGA-DD-A1EA-01	TCGA-DD-A1EA-01	TCGA-DD-A1EA	TCGA Liver Cancer (LIHC)	liver hepatocellular carcinoma	Liver	NO	NO	Mild	68	3.5	3.3	5	TCGA-DD-A1EA-F42204	TCGA-DD-A1EA	TCGA-DD-A1EA-01A	0.1	0.9	1	A	0.8	1.3	1.2	-24925	3298		0	2415		754	0	0	6	3	1,2 - Portal Fibrosis		2013-04-15	MALE	168	Hepatitis B	smoking	Hepatocellular Carcinoma	No	C22.0	8170-03-01	C22.0	YES	80	8.3	10.8
TCGA-DD-A1EB-01	TCGA-DD-A1EB-01	TCGA-DD-A1EB	TCGA Liver Cancer (LIHC)	liver hepatocellular carcinoma	Liver	NO	NO	None	72	3.5	3.7	5	TCGA-DD-A1EB-F42225	TCGA-DD-A1EB	TCGA-DD-A1EB-01A	0.1	0.3	1	B	0.6	1.1	1.3	-26471	3538		0	2017		505	1	0	6	7	0 - No Fibrosis		2013-04-15	FEMALE	164	Other	smoking	Hepatocellular Carcinoma	No	C22.0	8170-03-01	C22.0	YES	180	8.4	12
TCGA-DD-A1EB-11	TCGA-DD-A1EB-11	TCGA-DD-A1EB	TCGA Liver Cancer (LIHC)	liver hepatocellular carcinoma	Liver	NO	NO	None	72	3.5	3.7	5	TCGA-DD-A1EB-F42225	TCGA-DD-A1EB		0.1	0.3	1	B	0.6	1.1	1.3	-26471			0	2017		505	1	0	6	7	0 - No Fibrosis		2013-04-15	FEMALE	164	Other	smoking	Hepatocellular Carcinoma	No	C22.0	8170-03-01	C22.0	YES		8.4	12
TCGA-DD-A1EC-01	TCGA-DD-A1EC-01	TCGA-DD-A1EC	TCGA Liver Cancer (LIHC)	liver hepatocellular carcinoma	Liver	YES	NO	None	20	3.5	3.2	5	TCGA-DD-A1EC-F42201	TCGA-DD-A1EC	TCGA-DD-A1EC-01A	0.1	0.4		A	0.7	1.2	0.8	-7363	2254		0	602		299	1	0	6	2	0 - No Fibrosis		2013-04-15	FEMALE	157			Hepatocellular Carcinoma	No	C22.0	8170-03-01	C22.0	YES	110	8.4	12
TCGA-DD-A1EC-11	TCGA-DD-A1EC-11	TCGA-DD-A1EC	TCGA Liver Cancer (LIHC)	liver hepatocellular carcinoma	Liver	YES	NO	None	20	3.5	3.2	5	TCGA-DD-A1EC-F42201	TCGA-DD-A1EC		0.1	0.4		A	0.7	1.2	0.8	-7363			0	602		299	1	0	6	2	0 - No Fibrosis		2013-04-15	FEMALE	157			Hepatocellular Carcinoma	No	C22.0	8170-03-01	C22.0	YES		8.4	12
TCGA-DD-A1ED-01	TCGA-DD-A1ED-01	TCGA-DD-A1ED	TCGA Liver Cancer (LIHC)	liver hepatocellular carcinoma	Liver			None	68	3.5	4.2	5	TCGA-DD-A1ED-F42202	TCGA-DD-A1ED	TCGA-DD-A1ED-01A	0.1	0.8		A	0.8	1.3	1.3	-25039	1525		0	2301			1	0	6	3	0 - No Fibrosis		2013-04-15	MALE	168	Alcohol consumption	tattoos	Hepatocellular Carcinoma	No	C22.0	8170-03-01	C22.0	YES	60	8.4	12
TCGA-DD-A1ED-11	TCGA-DD-A1ED-11	TCGA-DD-A1ED	TCGA Liver Cancer (LIHC)	liver hepatocellular carcinoma	Liver			None	68	3.5	4.2	5	TCGA-DD-A1ED-F42202	TCGA-DD-A1ED	TCGA-DD-A1ED-11A	0.1	0.8		A	0.8	1.3	1.3	-25039	1525		0	2301			1	0	6	3	0 - No Fibrosis		2013-04-15	MALE	168	Alcohol consumption	tattoos	Hepatocellular Carcinoma	No	C22.0	8170-03-01	C22.0	YES	170	8.4	12
TCGA-DD-A1EE-01	TCGA-DD-A1EE-01	TCGA-DD-A1EE	TCGA Liver Cancer (LIHC)	liver hepatocellular carcinoma	Liver	NO	NO	Severe	73	3.5	2.7	5	TCGA-DD-A1EE-F42208	TCGA-DD-A1EE	TCGA-DD-A1EE-01A	0.1	0.5		B	0.8	1.3	1.2	-26858	1521	349	0	204		44	2	0	6	3	6 - Established Cirrhosis		2013-04-15	MALE	175	Hepatitis C		Hepatocellular Carcinoma	No	C22.0	8170-03-01	C22.0	YES	110	8.4	12
TCGA-DD-A1EE-11	TCGA-DD-A1EE-11	TCGA-DD-A1EE	TCGA Liver Cancer (LIHC)	liver hepatocellular carcinoma	Liver	NO	NO	Severe	73	3.5	2.7	5	TCGA-DD-A1EE-F42208	TCGA-DD-A1EE	TCGA-DD-A1EE-11A	0.1	0.5		B	0.8	1.3	1.2	-26858	1521	349	0	204		44	2	0	6	3	6 - Established Cirrhosis		2013-04-15	MALE	175	Hepatitis C		Hepatocellular Carcinoma	No	C22.0	8170-03-01	C22.0	YES	190	8.4	12
TCGA-DD-A1EF-01	TCGA-DD-A1EF-01	TCGA-DD-A1EF	TCGA Liver Cancer (LIHC)	liver hepatocellular carcinoma	Liver			Mild	57	3.5	4.5	5	TCGA-DD-A1EF-F42200	TCGA-DD-A1EF	TCGA-DD-A1EF-01A	0.1	1	9	B	0.6	1.1	0.9	-21165	1382	394	0				2	0	6	16211	3,4 - Fibrous Speta		2013-04-15	FEMALE	164	No History of Primary Risk Factors		Hepatocellular Carcinoma	No	C22.0	8170-03-01	C22.0	YES	190	8.4	12
TCGA-DD-A1EF-11	TCGA-DD-A1EF-11	TCGA-DD-A1EF	TCGA Liver Cancer (LIHC)	liver hepatocellular carcinoma	Liver			Mild	57	3.5	4.5	5	TCGA-DD-A1EF-F42200	TCGA-DD-A1EF	TCGA-DD-A1EF-11A	0.1	1	9	B	0.6	1.1	0.9	-21165	1382	394	0				2	0	6	16211	3,4 - Fibrous Speta		2013-04-15	FEMALE	164	No History of Primary Risk Factors		Hepatocellular Carcinoma	No	C22.0	8170-03-01	C22.0	YES	70	8.4	12
TCGA-DD-A1EG-01	TCGA-DD-A1EG-01	TCGA-DD-A1EG	TCGA Liver Cancer (LIHC)	liver hepatocellular carcinoma	Liver	NO	NO	Mild	76	3.5	4.2	5	TCGA-DD-A1EG-F42003	TCGA-DD-A1EG		0.1	0.7	1	A	0.8	1.3	0.6	-28108		1372	0		880	875	0	0	6	16	1,2 - Portal Fibrosis		2013-04-09	MALE	168	Alcohol consumption|Non-Alcoholic Fatty Liver Disease		Hepatocellular Carcinoma	No	C22.0	8170-03-01	C22.0	YES		8.4	12
TCGA-DD-A1EG-11	TCGA-DD-A1EG-11	TCGA-DD-A1EG	TCGA Liver Cancer (LIHC)	liver hepatocellular carcinoma	Liver	NO	NO	Mild	76	3.5	4.2	5	TCGA-DD-A1EG-F42003	TCGA-DD-A1EG		0.1	0.7	1	A	0.8	1.3	0.6	-28108		1372	0		880	875	0	0	6	16	1,2 - Portal Fibrosis		2013-04-09	MALE	168	Alcohol consumption|Non-Alcoholic Fatty Liver Disease		Hepatocellular Carcinoma	No	C22.0	8170-03-01	C22.0	YES		8.4	12
TCGA-DD-A1EH-01	TCGA-DD-A1EH-01	TCGA-DD-A1EH	TCGA Liver Cancer (LIHC)	liver hepatocellular carcinoma	Liver	YES	NO	None	23	3.5	4.7	5	TCGA-DD-A1EH-F42567	TCGA-DD-A1EH	TCGA-DD-A1EH-01A	0.1	1	1	B	0.8	1.3	1	-8499	933		0	1495		120	1	0	6	94340	3,4 - Fibrous Speta		2013-04-24	MALE	179	Hepatitis B		Hepatocellular Carcinoma	No	C22.0	8170-03-01	C22.0	YES	220	9.5	13.8
TCGA-DD-A1EH-11	TCGA-DD-A1EH-11	TCGA-DD-A1EH	TCGA Liver Cancer (LIHC)	liver hepatocellular carcinoma	Liver	YES	NO	None	23	3.5	4.7	5	TCGA-DD-A1EH-F42567	TCGA-DD-A1EH		0.1	1	1	B	0.8	1.3	1	-8499			0	1495		120	1	0	6	94340	3,4 - Fibrous Speta		2013-04-24	MALE	179	Hepatitis B		Hepatocellular Carcinoma	No	C22.0	8170-03-01	C22.0	YES		9.5	13.8
TCGA-DD-A1EI-01	TCGA-DD-A1EI-01	TCGA-DD-A1EI	TCGA Liver Cancer (LIHC)	liver hepatocellular carcinoma	Liver			Mild	46	3.5	5.1	5	TCGA-DD-A1EI-F42222	TCGA-DD-A1EI	TCGA-DD-A1EI-01A	0.1	0.7	0	B	0.8	1.3	0.9	-17097	926		0	183			2	0	6	24	6 - Established Cirrhosis		2013-04-15	MALE	175	Hepatitis B	cirrhosis	Hepatocellular Carcinoma	No	C22.0	8170-03-01	C22.0	YES	80	8.3	10.8
TCGA-DD-A1EI-11	TCGA-DD-A1EI-11	TCGA-DD-A1EI	TCGA Liver Cancer (LIHC)	liver hepatocellular carcinoma	Liver			Mild	46	3.5	5.1	5	TCGA-DD-A1EI-F42222	TCGA-DD-A1EI	TCGA-DD-A1EI-11A	0.1	0.7	0	B	0.8	1.3	0.9	-17097	926		0	183			2	0	6	24	6 - Established Cirrhosis		2013-04-15	MALE	175	Hepatitis B	cirrhosis	Hepatocellular Carcinoma	No	C22.0	8170-03-01	C22.0	YES	190	8.3	10.8
TCGA-DD-A1EJ-01	TCGA-DD-A1EJ-01	TCGA-DD-A1EJ	TCGA Liver Cancer (LIHC)	liver hepatocellular carcinoma	Liver	YES	NO	Mild	71	3.2	3.5	5	TCGA-DD-A1EJ-F42209	TCGA-DD-A1EJ	TCGA-DD-A1EJ-01A	0.1	0.7	1	B	0.6	1.1	0.6	-26009	909	1005	0	887		263	2	0	6	18840	0 - No Fibrosis		2013-04-15	FEMALE	154	No History of Primary Risk Factors		Hepatocellular Carcinoma	No	C22.0	8170-03-01	C22.0	YES	290	8.3	10.8
TCGA-DD-A1EJ-11	TCGA-DD-A1EJ-11	TCGA-DD-A1EJ	TCGA Liver Cancer (LIHC)	liver hepatocellular carcinoma	Liver	YES	NO	Mild	71	3.2	3.5	5	TCGA-DD-A1EJ-F42209	TCGA-DD-A1EJ	TCGA-DD-A1EJ-11A	0.1	0.7	1	B	0.6	1.1	0.6	-26009	909	1005	0	887		263	2	0	6	18840	0 - No Fibrosis		2013-04-15	FEMALE	154	No History of Primary Risk Factors		Hepatocellular Carcinoma	No	C22.0	8170-03-01	C22.0	YES	130	8.3	10.8
TCGA-DD-A1EK-01	TCGA-DD-A1EK-01	TCGA-DD-A1EK	TCGA Liver Cancer (LIHC)	liver hepatocellular carcinoma	Liver	YES	NO	Mild	64	3.5	4.3	5	TCGA-DD-A1EK-F42001	TCGA-DD-A1EK	TCGA-DD-A1EK-01A	0.1	0.5	1	A	0.6	1.1	0.7	-23437	819	558	0			167	0	0	6	19	0 - No Fibrosis		2013-04-09	FEMALE	159	Other	tobacco, birth control bills	Hepatocellular Carcinoma	No	C22.0	8170-03-01	C22.0	YES	40	8.3	10.8
TCGA-DD-A1EL-01	TCGA-DD-A1EL-01	TCGA-DD-A1EL	TCGA Liver Cancer (LIHC)	liver hepatocellular carcinoma	Liver	NO	NO	Mild	23	3.5	4.4	5	TCGA-DD-A1EL-F42229	TCGA-DD-A1EL	TCGA-DD-A1EL-01A	0.1	0.5		A	0.8	1.3	1	-8573	577	415	0			[Discrepancy]	0	0	6	5	0 - No Fibrosis		2013-04-15	MALE	182	Hepatitis B		Hepatocellular Carcinoma	No	C22.0	8170-03-01	C22.0	YES	130	8.3	10.8
TCGA-DD-A1EL-11	TCGA-DD-A1EL-11	TCGA-DD-A1EL	TCGA Liver Cancer (LIHC)	liver hepatocellular carcinoma	Liver	NO	NO	Mild	23	3.5	4.4	5	TCGA-DD-A1EL-F42229	TCGA-DD-A1EL		0.1	0.5		A	0.8	1.3	1	-8573		415	0			[Discrepancy]	0	0	6	5	0 - No Fibrosis		2013-04-15	MALE	182	Hepatitis B		Hepatocellular Carcinoma	No	C22.0	8170-03-01	C22.0	YES		8.3	10.8
TCGA-DD-A39V-01	TCGA-DD-A39V-01	TCGA-DD-A39V	TCGA Liver Cancer (LIHC)	liver hepatocellular carcinoma	Liver	NO	YES	None	77	3.5	4	5	TCGA-DD-A39V-F42707	TCGA-DD-A39V	TCGA-DD-A39V-01A			3	A	0.8	1.2	0.9	-28254	4180	643	0			455	1				0 - No Fibrosis		2013-04-27	MALE	174	No History of Primary Risk Factors		Hepatocellular Carcinoma	No	C22.0	8170-03-01	C22.0	YES	180	8.4	12
TCGA-DD-A39V-11	TCGA-DD-A39V-11	TCGA-DD-A39V	TCGA Liver Cancer (LIHC)	liver hepatocellular carcinoma	Liver	NO	YES	None	77	3.5	4	5	TCGA-DD-A39V-F42707	TCGA-DD-A39V	TCGA-DD-A39V-11A			3	A	0.8	1.2	0.9	-28254	4180	643	0			455	1				0 - No Fibrosis		2013-04-27	MALE	174	No History of Primary Risk Factors		Hepatocellular Carcinoma	No	C22.0	8170-03-01	C22.0	YES	140	8.4	12
TCGA-DD-A39W-01	TCGA-DD-A39W-01	TCGA-DD-A39W	TCGA Liver Cancer (LIHC)	liver hepatocellular carcinoma	Liver				29				TCGA-DD-A39W-F42705	TCGA-DD-A39W	TCGA-DD-A39W-01A								-10699	6014	827	0										2013-05-08	FEMALE	177	No History of Primary Risk Factors		Hepatocellular Carcinoma	No	C22.0	8170-03-01	C22.0	YES	180
TCGA-DD-A39W-11	TCGA-DD-A39W-11	TCGA-DD-A39W	TCGA Liver Cancer (LIHC)	liver hepatocellular carcinoma	Liver				29				TCGA-DD-A39W-F42705	TCGA-DD-A39W									-10699		827	0										2013-05-08	FEMALE	177	No History of Primary Risk Factors		Hepatocellular Carcinoma	No	C22.0	8170-03-01	C22.0	YES
TCGA-DD-A39X-01	TCGA-DD-A39X-01	TCGA-DD-A39X	TCGA Liver Cancer (LIHC)	liver hepatocellular carcinoma	Liver	NO	NO	None	78	3.5	4.1	5	TCGA-DD-A39X-F42568	TCGA-DD-A39X	TCGA-DD-A39X-01A	0.1	0.5	2	A	0.6	0.9	0.9	-28528	4705	1694	0			1032	1	0	6	10	0 - No Fibrosis		2013-04-24	FEMALE	152	No History of Primary Risk Factors		Hepatocellular Carcinoma	No	C22.0	8170-03-01	C22.0	YES	120	8.4	12
TCGA-DD-A39X-11	TCGA-DD-A39X-11	TCGA-DD-A39X	TCGA Liver Cancer (LIHC)	liver hepatocellular carcinoma	Liver	NO	NO	None	78	3.5	4.1	5	TCGA-DD-A39X-F42568	TCGA-DD-A39X	TCGA-DD-A39X-11A	0.1	0.5	2	A	0.6	0.9	0.9	-28528	4705	1694	0			1032	1	0	6	10	0 - No Fibrosis		2013-04-24	FEMALE	152	No History of Primary Risk Factors		Hepatocellular Carcinoma	No	C22.0	8170-03-01	C22.0	YES	230	8.4	12
TCGA-DD-A39Y-01	TCGA-DD-A39Y-01	TCGA-DD-A39Y	TCGA Liver Cancer (LIHC)	liver hepatocellular carcinoma	Liver			None	67	3.5	4	5	TCGA-DD-A39Y-F42701	TCGA-DD-A39Y	TCGA-DD-A39Y-01A	0.1	1.1		A	1.2	12	0.8	-24769	3530	171	0				2	0	6	5600	0 - No Fibrosis		2013-04-27	MALE	176	No History of Primary Risk Factors		Hepatocellular Carcinoma	No	C22.0	8170-03-01	C22.0	YES	220	8.4	12
TCGA-DD-A39Z-01	TCGA-DD-A39Z-01	TCGA-DD-A39Z	TCGA Liver Cancer (LIHC)	liver hepatocellular carcinoma	Liver				43	3.5	3.1	5	TCGA-DD-A39Z-F42006	TCGA-DD-A39Z	TCGA-DD-A39Z-01A	0.1	1.2	1	B	0.6	0.9	0.7	-15930	5728	601	0				2						2013-04-24	FEMALE	165	Alcohol consumption	extensive tobacco history	Hepatocellular Carcinoma	No	C22.0	8170-03-01	C22.0	YES	250	8.4	12
TCGA-DD-A39Z-11	TCGA-DD-A39Z-11	TCGA-DD-A39Z	TCGA Liver Cancer (LIHC)	liver hepatocellular carcinoma	Liver				43	3.5	3.1	5	TCGA-DD-A39Z-F42006	TCGA-DD-A39Z		0.1	1.2	1	B	0.6	0.9	0.7	-15930		601	0				2						2013-04-24	FEMALE	165	Alcohol consumption	extensive tobacco history	Hepatocellular Carcinoma	No	C22.0	8170-03-01	C22.0	YES		8.4	12
TCGA-DD-A3A0-01	TCGA-DD-A3A0-01	TCGA-DD-A3A0	TCGA Liver Cancer (LIHC)	liver hepatocellular carcinoma	Liver	NO	YES	None	70	3.5	3.3	5	TCGA-DD-A3A0-F42710	TCGA-DD-A3A0	TCGA-DD-A3A0-01A	0.1	1.4		A	0.8	1.2	2.7	-25889	3586	785	0			359	1	0	6	1	0 - No Fibrosis		2013-04-27	MALE	178	No History of Primary Risk Factors		Hepatocellular Carcinoma	No	C22.0	8170-03-01	C22.0	YES	220	8.4	12
TCGA-DD-A3A1-01	TCGA-DD-A3A1-01	TCGA-DD-A3A1	TCGA Liver Cancer (LIHC)	liver hepatocellular carcinoma	Liver			None	65	3.5	3.8	5	TCGA-DD-A3A1-F42704	TCGA-DD-A3A1	TCGA-DD-A3A1-01A	0.1	0.8	1	A	0.8	1.2	1.1	-24046	3753	233	0				0	0	6	6	0 - No Fibrosis		2013-04-27	MALE	185	No History of Primary Risk Factors		Hepatocellular Carcinoma	No	C22.0	8170-03-01	C22.0	YES	240	8.4	12
TCGA-DD-A3A1-11	TCGA-DD-A3A1-11	TCGA-DD-A3A1	TCGA Liver Cancer (LIHC)	liver hepatocellular carcinoma	Liver			None	65	3.5	3.8	5	TCGA-DD-A3A1-F42704	TCGA-DD-A3A1	TCGA-DD-A3A1-11A	0.1	0.8	1	A	0.8	1.2	1.1	-24046	3753	233	0				0	0	6	6	0 - No Fibrosis		2013-04-27	MALE	185	No History of Primary Risk Factors		Hepatocellular Carcinoma	No	C22.0	8170-03-01	C22.0	YES	180	8.4	12
TCGA-DD-A3A2-01	TCGA-DD-A3A2-01	TCGA-DD-A3A2	TCGA Liver Cancer (LIHC)	liver hepatocellular carcinoma	Liver			None	76	3.5	4.2	5	TCGA-DD-A3A2-F42706	TCGA-DD-A3A2	TCGA-DD-A3A2-01A	0.1	0.5		A	0.6	0.9	0.8	-27930	4962	2131	0				0				0 - No Fibrosis		2013-04-27	FEMALE	178	No History of Primary Risk Factors		Hepatocellular Carcinoma	No	C22.0	8170-03-01	C22.0	YES	250	8.4	12
TCGA-DD-A3A2-11	TCGA-DD-A3A2-11	TCGA-DD-A3A2	TCGA Liver Cancer (LIHC)	liver hepatocellular carcinoma	Liver			None	76	3.5	4.2	5	TCGA-DD-A3A2-F42706	TCGA-DD-A3A2	TCGA-DD-A3A2-11A	0.1	0.5		A	0.6	0.9	0.8	-27930	4962	2131	0				0				0 - No Fibrosis		2013-04-27	FEMALE	178	No History of Primary Risk Factors		Hepatocellular Carcinoma	No	C22.0	8170-03-01	C22.0	YES	160	8.4	12
TCGA-DD-A3A3-01	TCGA-DD-A3A3-01	TCGA-DD-A3A3	TCGA Liver Cancer (LIHC)	liver hepatocellular carcinoma	Liver			None	45				TCGA-DD-A3A3-F42700	TCGA-DD-A3A3	TCGA-DD-A3A3-01A	0.1	0.9		B	0.8	1.2	1.2	-16708	4397	535	0				1	0	6	6	0 - No Fibrosis		2013-04-27	MALE	167	No History of Primary Risk Factors		Hepatocellular Carcinoma	No	C22.0	8170-03-01	C22.0	YES	250	8.4	12
TCGA-DD-A3A3-11	TCGA-DD-A3A3-11	TCGA-DD-A3A3	TCGA Liver Cancer (LIHC)	liver hepatocellular carcinoma	Liver			None	45				TCGA-DD-A3A3-F42700	TCGA-DD-A3A3	TCGA-DD-A3A3-11A	0.1	0.9		B	0.8	1.2	1.2	-16708	4397	535	0				1	0	6	6	0 - No Fibrosis		2013-04-27	MALE	167	No History of Primary Risk Factors		Hepatocellular Carcinoma	No	C22.0	8170-03-01	C22.0	YES	190	8.4	12
TCGA-DD-A3A4-01	TCGA-DD-A3A4-01	TCGA-DD-A3A4	TCGA Liver Cancer (LIHC)	liver hepatocellular carcinoma	Liver	YES	NO	None	37	3.5	3.3	5	TCGA-DD-A3A4-F42697	TCGA-DD-A3A4	TCGA-DD-A3A4-01A	0.1	1	2	B	0.4	1.2	1	-13739	4776	612	0			87	0				0 - No Fibrosis		2013-04-27	MALE	189	Other	Tobacco use	Hepatocellular Carcinoma	No	C22.0	8170-03-01	C22.0	YES	160	8.4	12
TCGA-DD-A3A4-11	TCGA-DD-A3A4-11	TCGA-DD-A3A4	TCGA Liver Cancer (LIHC)	liver hepatocellular carcinoma	Liver	YES	NO	None	37	3.5	3.3	5	TCGA-DD-A3A4-F42697	TCGA-DD-A3A4		0.1	1	2	B	0.4	1.2	1	-13739		612	0			87	0				0 - No Fibrosis		2013-04-27	MALE	189	Other	Tobacco use	Hepatocellular Carcinoma	No	C22.0	8170-03-01	C22.0	YES		8.4	12
TCGA-DD-A3A5-01	TCGA-DD-A3A5-01	TCGA-DD-A3A5	TCGA Liver Cancer (LIHC)	liver hepatocellular carcinoma	Liver	NO	NO	None	66	3.5	4.2	5	TCGA-DD-A3A5-F42571	TCGA-DD-A3A5	TCGA-DD-A3A5-01A	0.1	0.8		A	0.6	0.9	0.7	-24288	5538	3125	0			84	1	0	6	55	0 - No Fibrosis		2013-04-24	FEMALE	170	No History of Primary Risk Factors		Hepatocellular Carcinoma	No	C22.0	8170-03-01	C22.0	YES	250	8.4	12
TCGA-DD-A3A5-11	TCGA-DD-A3A5-11	TCGA-DD-A3A5	TCGA Liver Cancer (LIHC)	liver hepatocellular carcinoma	Liver	NO	NO	None	66	3.5	4.2	5	TCGA-DD-A3A5-F42571	TCGA-DD-A3A5		0.1	0.8		A	0.6	0.9	0.7	-24288		3125	0			84	1	0	6	55	0 - No Fibrosis		2013-04-24	FEMALE	170	No History of Primary Risk Factors		Hepatocellular Carcinoma	No	C22.0	8170-03-01	C22.0	YES		8.4	12
TCGA-DD-A3A6-01	TCGA-DD-A3A6-01	TCGA-DD-A3A6	TCGA Liver Cancer (LIHC)	liver hepatocellular carcinoma	Liver			None	72	3.5	4.3	5	TCGA-DD-A3A6-F42703	TCGA-DD-A3A6	TCGA-DD-A3A6-01A	0.1	0.4		A	0.6	0.9	1	-26319	5304	3258	0				0				0 - No Fibrosis		2013-04-27	FEMALE	175	No History of Primary Risk Factors		Hepatocellular Carcinoma	No	C22.0	8170-03-01	C22.0	YES	150	8.4	12
TCGA-DD-A3A6-11	TCGA-DD-A3A6-11	TCGA-DD-A3A6	TCGA Liver Cancer (LIHC)	liver hepatocellular carcinoma	Liver			None	72	3.5	4.3	5	TCGA-DD-A3A6-F42703	TCGA-DD-A3A6	TCGA-DD-A3A6-11A	0.1	0.4		A	0.6	0.9	1	-26319	5304	3258	0				0				0 - No Fibrosis		2013-04-27	FEMALE	175	No History of Primary Risk Factors		Hepatocellular Carcinoma	No	C22.0	8170-03-01	C22.0	YES	20	8.4	12
TCGA-DD-A3A7-01	TCGA-DD-A3A7-01	TCGA-DD-A3A7	TCGA Liver Cancer (LIHC)	liver hepatocellular carcinoma	Liver	YES	NO	Mild	67				TCGA-DD-A3A7-F42004	TCGA-DD-A3A7	TCGA-DD-A3A7-01A	0.1	0.8	4		0.8	1.2	1.4	-24599	4772	419	0			144	1	0	6	120	0 - No Fibrosis		2013-04-09	MALE	188	Alcohol consumption|Other	tobacco	Hepatocellular Carcinoma	No	C22.0	8170-03-01	C22.0	YES	130	8.4	12
TCGA-DD-A3A8-01	TCGA-DD-A3A8-01	TCGA-DD-A3A8	TCGA Liver Cancer (LIHC)	liver hepatocellular carcinoma	Liver			None	75				TCGA-DD-A3A8-F42570	TCGA-DD-A3A8	TCGA-DD-A3A8-01A	0.1	1	3	A	0.8	1.2	0.9	-27524	3708	11	0				1	0	6	4	0 - No Fibrosis		2013-04-24	MALE	177	No History of Primary Risk Factors		Hepatocellular Carcinoma	No	C22.0	8170-03-01	C22.0	YES	290
TCGA-DD-A3A8-11	TCGA-DD-A3A8-11	TCGA-DD-A3A8	TCGA Liver Cancer (LIHC)	liver hepatocellular carcinoma	Liver			None	75				TCGA-DD-A3A8-F42570	TCGA-DD-A3A8		0.1	1	3	A	0.8	1.2	0.9	-27524		11	0				1	0	6	4	0 - No Fibrosis		2013-04-24	MALE	177	No History of Primary Risk Factors		Hepatocellular Carcinoma	No	C22.0	8170-03-01	C22.0	YES
TCGA-DD-A3A9-01	TCGA-DD-A3A9-01	TCGA-DD-A3A9	TCGA Liver Cancer (LIHC)	liver hepatocellular carcinoma	Liver			None	64	3.5	4	5	TCGA-DD-A3A9-F42709	TCGA-DD-A3A9	TCGA-DD-A3A9-01A	0.1	0.3		A	0.6	0.9	0.9	-23526	3584	931	0			289	1	0	6	19930	0 - No Fibrosis		2013-04-27	FEMALE	168	Other	smoker	Hepatocellular Carcinoma	No	C22.0	8170-03-01	C22.0	YES	230	8.4	12
TCGA-DD-A4NA-01	TCGA-DD-A4NA-01	TCGA-DD-A4NA	TCGA Liver Cancer (LIHC)	liver hepatocellular carcinoma	Liver			None	67				TCGA-DD-A4-F49640	TCGA-DD-A4	TCGA-DD-A4-01A			2		0.6	1.1	0.8	-24603	1198		0	1008			0	0	6	3	5 - Nodular Formation and Incomplete Cirrhosis		2013-10-07	FEMALE	166	No History of Primary Risk Factors		Hepatocellular Carcinoma	No	C22.0	8170-03-01	C22.0	YES	110	8.3	10.8
TCGA-DD-A4NB-01	TCGA-DD-A4NB-01	TCGA-DD-A4NB	TCGA Liver Cancer (LIHC)	liver hepatocellular carcinoma	Liver	NO	NO	Mild	25				TCGA-DD-A4NB-F59448	TCGA-DD-A4NB	TCGA-DD-A4NB-01A	0.1	1	2		0.8	1.3	0.8	-9426	464		0	989	913	912	1	0	6	3			2014-05-13	MALE	185	No History of Primary Risk Factors		Fibrolamellar Carcinoma	No	C22.0	8171-03-01	C22.0	YES	180	9.5	13.8
TCGA-DD-A4ND-01	TCGA-DD-A4ND-01	TCGA-DD-A4ND	TCGA Liver Cancer (LIHC)	liver hepatocellular carcinoma	Liver	NO	NO	None	56	3.5	3.9	5	TCGA-DD-A4ND-F43021	TCGA-DD-A4ND	TCGA-DD-A4ND-01A	0.1	0.5	3	A	0.6	1.1	0.7	-20782	2088		0	2746		20	1				0 - No Fibrosis		2014-10-21	FEMALE	162	No History of Primary Risk Factors		Hepatocellular Carcinoma	No	C22.0	8170-03-01	C22.0	YES	140	8.4	12
TCGA-DD-A4NE-01	TCGA-DD-A4NE-01	TCGA-DD-A4NE	TCGA Liver Cancer (LIHC)	liver hepatocellular carcinoma	Liver	NO	NO	None	75	3.5	4.2	5	TCGA-DD-A4NE-F49644	TCGA-DD-A4NE	TCGA-DD-A4NE-01A	0.1	0.9	3	A	0.6	1	0.8	-27549	631	660	0			190	0	0	6	28	0 - No Fibrosis		2013-10-07	FEMALE	170	No History of Primary Risk Factors		Hepatocellular Carcinoma	No	C22.0	8170-03-01	C22.0	YES	200	8.3	10.8
TCGA-DD-A4NF-01	TCGA-DD-A4NF-01	TCGA-DD-A4NF	TCGA Liver Cancer (LIHC)	liver hepatocellular carcinoma	Liver	NO	YES	Mild	72	3.5	4	5	TCGA-DD-A4NF-F59456	TCGA-DD-A4NF	TCGA-DD-A4NF-01A	0.1	0.5		A	0.8	1.3	0.9	-26330	364		0	942		656	0	0	6	6	6 - Established Cirrhosis		2014-05-13	MALE	173	Hepatitis C		Hepatocellular Carcinoma	No	C22.0	8170-03-01	C22.0	YES	200	9.5	13.8
TCGA-DD-A4NG-01	TCGA-DD-A4NG-01	TCGA-DD-A4NG	TCGA Liver Cancer (LIHC)	liver hepatocellular carcinoma	Liver			None	77	3.5	4.5	5	TCGA-DD-A4NG-F49648	TCGA-DD-A4NG	TCGA-DD-A4NG-01A	0.1	0.5	1	A	0.8	1.3	0.9	-28234	629	802	0	445		430	1	0	6	3			2013-10-07	MALE	164	Alcohol consumption		Hepatocellular Carcinoma	No	C22.0	8170-03-01	C22.0	YES	280	8.3	10.8
TCGA-DD-A4NH-01	TCGA-DD-A4NH-01	TCGA-DD-A4NH	TCGA Liver Cancer (LIHC)	liver hepatocellular carcinoma	Liver	YES	NO	None	65	3.5	4	5	TCGA-DD-A4NH-F59474	TCGA-DD-A4NH	TCGA-DD-A4NH-01A	0.1	0.6	1	A	0.6	1.1	0.8	-23865	335		0	917		161	0	0	6	92889	1,2 - Portal Fibrosis		2014-05-13	FEMALE	157	Alcohol consumption		Hepatocellular Carcinoma	No	C22.0	8170-03-01	C22.0	YES	270	9.5	13.8
TCGA-DD-A4NI-01	TCGA-DD-A4NI-01	TCGA-DD-A4NI	TCGA Liver Cancer (LIHC)	liver hepatocellular carcinoma	Liver				67	3.5	4.4	5	TCGA-DD-A4NI-F59476	TCGA-DD-A4NI	TCGA-DD-A4NI-01A	0.1	0.6	6	A	0.8	1.3	1.1	-24516	357		0	816			0	0	6	6	0 - No Fibrosis		2014-05-13	MALE	172	Alcohol consumption|Non-Alcoholic Fatty Liver Disease	tobacco	Hepatocellular Carcinoma	No	C22.0	8170-03-01	C22.0	YES	130	9.5	13.8
TCGA-DD-A4NJ-01	TCGA-DD-A4NJ-01	TCGA-DD-A4NJ	TCGA Liver Cancer (LIHC)	liver hepatocellular carcinoma	Liver	NO	NO	Mild	54	3.5	4.7	5	TCGA-DD-A4NJ-F59477	TCGA-DD-A4NJ	TCGA-DD-A4NJ-01A	0.1	0.4	1	A	0.6	1.1	0.7	-19964	416		0	928		549	0	0	6	5	1,2 - Portal Fibrosis		2014-05-13	FEMALE	164	Non-Alcoholic Fatty Liver Disease		Hepatocellular Carcinoma	No	C22.0	8170-03-01	C22.0	YES	140	9.5	13.8
TCGA-DD-A4NK-01	TCGA-DD-A4NK-01	TCGA-DD-A4NK	TCGA Liver Cancer (LIHC)	liver hepatocellular carcinoma	Liver	NO	NO	None	80	3.5	4.1	5	TCGA-DD-A4NK-F49654	TCGA-DD-A4NK	TCGA-DD-A4NK-01A	0.1	0.5	3	A	0.7	1.2	1.1	-29244	3143	1210	0			89	0	0	6	3	0 - No Fibrosis		2013-10-07	FEMALE		No History of Primary Risk Factors		Hepatocellular Carcinoma	No	C22.0	8170-03-01	C22.0	YES	130	8.4	12
TCGA-DD-A4NL-01	TCGA-DD-A4NL-01	TCGA-DD-A4NL	TCGA Liver Cancer (LIHC)	liver hepatocellular carcinoma	Liver			None	46	3.5	4.4	5	TCGA-DD-A4NL-F59645	TCGA-DD-A4NL	TCGA-DD-A4NL-01A	0.1	0.3			0.8	1.3	1	-16874	1896		0	1711			1	0	6	2	0 - No Fibrosis		2014-05-17	MALE	173	Alcohol consumption|Other	Tobacco use	Hepatocellular Carcinoma	No	C22.0	8170-03-01	C22.0	YES	80
TCGA-DD-A4NN-01	TCGA-DD-A4NN-01	TCGA-DD-A4NN	TCGA Liver Cancer (LIHC)	liver hepatocellular carcinoma	Liver	NO	NO		56	3.5	4.3	5	TCGA-DD-A4NN-F49659	TCGA-DD-A4NN	TCGA-DD-A4NN-01A	0.1	0.5	1	A	0.7	1.2	0.9	-20548	3053	899	0			166	0	0	6	4223	0 - No Fibrosis		2013-10-07	FEMALE	163	No History of Primary Risk Factors		Hepatocellular Carcinoma	No	C22.0	8170-03-01	C22.0	YES	240	8	12
TCGA-DD-A4NO-01	TCGA-DD-A4NO-01	TCGA-DD-A4NO	TCGA Liver Cancer (LIHC)	liver hepatocellular carcinoma	Liver	NO	NO	Mild	65	3.5	4.5	5	TCGA-DD-A4NO-F49662	TCGA-DD-A4NO	TCGA-DD-A4NO-01A	0.1	0.4		A	0.8	1.3	1.6	-24090	1879		0	2245		990	0	0	6	3	0 - No Fibrosis		2013-10-07	MALE	176	Hepatitis C|Other	Tobacco use	Hepatocellular Carcinoma	No	C22.0	8170-03-01	C22.0	YES	190	8.4	12
TCGA-DD-A4NP-01	TCGA-DD-A4NP-01	TCGA-DD-A4NP	TCGA Liver Cancer (LIHC)	liver hepatocellular carcinoma	Liver	NO	NO	None	32	3.5	2.4	5	TCGA-DD-A4NP-F59646	TCGA-DD-A4NP	TCGA-DD-A4NP-01A	0.1	0.7		B	0.9	1.4	1.9	-11838	2736		0	3308		1286	0	0	6	2	0 - No Fibrosis		2014-05-17	MALE	177	No History of Primary Risk Factors		Hepatocellular Carcinoma	No	C22.0	8170-03-01	C22.0	YES	160	8.4	12
TCGA-DD-A4NQ-01	TCGA-DD-A4NQ-01	TCGA-DD-A4NQ	TCGA Liver Cancer (LIHC)	liver hepatocellular carcinoma	Liver	YES	NO	Mild	60	3.5	4.4	5	TCGA-DD-A4NQ-F49669	TCGA-DD-A4NQ	TCGA-DD-A4NQ-01A	0.1	0.7	1	A	0.8	1.3	0.8	-22111	2030	373	0			126	0	0	6	141			2013-10-07	MALE	159	Hepatitis B|Other	tobacco	Hepatocellular Carcinoma	No	C22.0	8170-03-01	C22.0	YES	120	8.4	12
TCGA-DD-A4NR-01	TCGA-DD-A4NR-01	TCGA-DD-A4NR	TCGA Liver Cancer (LIHC)	liver hepatocellular carcinoma	Liver				85	3.5	3.1	5	TCGA-DD-A4NR-F49670	TCGA-DD-A4NR	TCGA-DD-A4NR-01A	0.1	0.8	1	A	0.7	1.2	1	-31386	2652	9	0				0	0	6	40250	6 - Established Cirrhosis		2013-10-07	FEMALE	64	Other	primary biliary cirrhosis	Hepatocellular Carcinoma	No	C22.0	8170-03-01	C22.0	YES	240	8.4	12
TCGA-DD-A4NS-01	TCGA-DD-A4NS-01	TCGA-DD-A4NS	TCGA Liver Cancer (LIHC)	liver hepatocellular carcinoma	Liver	NO	NO	None	61				TCGA-DD-A4NS-F49671	TCGA-DD-A4NS	TCGA-DD-A4NS-01A	0.1	0.9	2		0.7	1.2	1.1	-22638	2596	2456	0		913	893	0	0	6	2	0 - No Fibrosis		2013-10-07	FEMALE	167	Alcohol consumption		Hepatocellular Carcinoma	No	C22.0	8170-03-01	C22.0	YES	140	8.4	12
TCGA-DD-A4NV-01	TCGA-DD-A4NV-01	TCGA-DD-A4NV	TCGA Liver Cancer (LIHC)	liver hepatocellular carcinoma	Liver			None	61	3.5	3.9	5	TCGA-DD-A4NV-F59879	TCGA-DD-A4NV		0.1	0.5	1	A	0.8	1.3	0.8	-22438			0	2398			1	0	6	3	0 - No Fibrosis		2014-05-22	MALE	179	Non-Alcoholic Fatty Liver Disease|Other	morbid obesity, tobacco use	Hepatocellular Carcinoma	No	C22.0	8170-03-01	C22.0	YES		8.4	12
TCGA-DD-A73A-01	TCGA-DD-A73A-01	TCGA-DD-A73A	TCGA Liver Cancer (LIHC)	liver hepatocellular carcinoma	Liver			Mild	71	3.5	4.4	5	TCGA-DD-A73A-F66593	TCGA-DD-A73A		0.1	1.2		A	0.8	1.3	1.4	-26136			0	728			1	0	6	4	3,4 - Fibrous Speta		2014-10-21	MALE	174	Alcohol consumption		Hepatocellular Carcinoma	No	C22.0	8170-03-01	C22.0	YES		9.5	13.8
TCGA-DD-A73B-01	TCGA-DD-A73B-01	TCGA-DD-A73B	TCGA Liver Cancer (LIHC)	liver hepatocellular carcinoma	Liver				72	3.5	3.5	5		TCGA-DD-A73B	TCGA-DD-A73B-01A	0.1	2.1	1	B	0.6	1.1	0.9	-26390	345	283	0				0	0	6	30	6 - Established Cirrhosis		2013-09-30	FEMALE	154	Alpha-1 Antitrypsin Deficiency|Other	Gilberts syndrome.	Hepatocellular Carcinoma	No	C22.0	8170-03-01	C22.0	YES	150	0.8	1.2
TCGA-DD-A73C-01	TCGA-DD-A73C-01	TCGA-DD-A73C	TCGA Liver Cancer (LIHC)	liver hepatocellular carcinoma	Liver	NO	NO	None	65	3.5	4.9	5	TCGA-DD-A73C-F66595	TCGA-DD-A73C	TCGA-DD-A73C-01A	0.1	0.7	1	A	0.6	1.1	0.8	-23782	288		0	701		566	0	0	6	3	0 - No Fibrosis		2014-10-21	FEMALE	159	No History of Primary Risk Factors		Hepatocellular Carcinoma	No	C22.0	8170-03-01	C22.0	YES	160	9.5	13.8
TCGA-DD-A73D-01	TCGA-DD-A73D-01	TCGA-DD-A73D	TCGA Liver Cancer (LIHC)	liver hepatocellular carcinoma	Liver	NO	NO	Mild	68	3.5	4.5	5	TCGA-DD-A73D-F66596	TCGA-DD-A73D	TCGA-DD-A73D-01A	0.1	0.3	1	A	0.6	1.1	0.8	-24941	313		0	693		592	0	0	6	4	6 - Established Cirrhosis		2014-10-21	FEMALE	170	Hepatitis C		Hepatocellular Carcinoma	No	C22.0	8170-03-01	C22.0	YES	250	9.5	13.8
TCGA-DD-A73E-01	TCGA-DD-A73E-01	TCGA-DD-A73E	TCGA Liver Cancer (LIHC)	liver hepatocellular carcinoma	Liver			Mild	66	3.5	4.7	5	TCGA-DD-A73E-F66598	TCGA-DD-A73E	TCGA-DD-A73E-01A	0.1	0.4	2	A	0.8	1.3	1.2	-24377	336		0	44			0	0	6	1	0 - No Fibrosis		2014-10-21	MALE	172	Alcohol consumption|Non-Alcoholic Fatty Liver Disease		Hepatocellular Carcinoma	No	C22.0	8170-03-01	C22.0	YES	170	9.5	13.8
TCGA-DD-A73F-01	TCGA-DD-A73F-01	TCGA-DD-A73F	TCGA Liver Cancer (LIHC)	liver hepatocellular carcinoma	Liver			None	77	3.5	4.6	5	TCGA-DD-A73F-F71152	TCGA-DD-A73F	TCGA-DD-A73F-01A	0.1	0.5	1	A	0.6	1.1	1	-28234	975		0	1085			1	0	6	283	0 - No Fibrosis		2015-03-18	FEMALE	164	No History of Primary Risk Factors		Hepatocellular Carcinoma	No	C22.0	8170-03-01	C22.0	YES	250	9.5	13.8
TCGA-DD-A73G-01	TCGA-DD-A73G-01	TCGA-DD-A73G	TCGA Liver Cancer (LIHC)	liver hepatocellular carcinoma	Liver			None	73	3.5	3.2	5	TCGA-DD-A73G-F66600	TCGA-DD-A73G	TCGA-DD-A73G-01A	0.1	0.5	1	A	0.7	1.2	0.7	-26949	3045		0	3478			0	0	6	2035400	0 - No Fibrosis		2014-10-21	FEMALE	155	No History of Primary Risk Factors		Hepatocellular Carcinoma	No	C22.0	8170-03-01	C22.0	YES	240	8.4	12
TCGA-DD-AA3A-01	TCGA-DD-AA3A-01	TCGA-DD-AA3A	TCGA Liver Cancer (LIHC)	liver hepatocellular carcinoma	Liver			None	81	3.5	4.9	5		TCGA-DD-AA3A	TCGA-DD-AA3A-01A	0.1	0.8	1	A	0.6	1.1	0.7	-29712	1559	410	0				1	0	8	1	0 - No Fibrosis		2014-05-27	FEMALE	151	No History of Primary Risk Factors		Hepatocholangiocarcinoma (Mixed)	No	C22.0	8180-03-01	C22.0	YES	100	0.9	1.2
TCGA-DD-AAC8-01	TCGA-DD-AAC8-01	TCGA-DD-AAC8	TCGA Liver Cancer (LIHC)	liver hepatocellular carcinoma	Liver			Mild	72	3.8	4.3	5.3		TCGA-DD-AAC8	TCGA-DD-AAC8-01A	0.2	0.6		A	0.7	1.5	1.1	-26322	2080	16	0				0	0	8	1	1,2 - Portal Fibrosis		2014-06-28	MALE	156	Hepatitis B		Hepatocellular Carcinoma	No	C22.0	8170-03-01	C22.0	YES	570	1	1
TCGA-DD-AAC9-01	TCGA-DD-AAC9-01	TCGA-DD-AAC9	TCGA Liver Cancer (LIHC)	liver hepatocellular carcinoma	Liver			Mild	51	3.8	4.2	5.3	TCGA-DD-AAC9-F68363	TCGA-DD-AAC9	TCGA-DD-AAC9-01A	0.2	0.7		A	0.7	1.5	1.3	-18911	2069		0	347			0	0	8	5	6 - Established Cirrhosis		2014-11-17	MALE	174	Hepatitis B		Hepatocellular Carcinoma	No	C22.0	8170-03-01	C22.0	YES	130	1	1
TCGA-DD-AACA-01	TCGA-DD-AACA-01	TCGA-DD-AACA	TCGA Liver Cancer (LIHC)	liver hepatocellular carcinoma	Liver	NO	NO	Mild	65	3.8	3.7	5.3	TCGA-DD-AACA-F68364	TCGA-DD-AACA	TCGA-DD-AACA-01A	0.2	0.7		A	0.7	1.5	1.2	-23973	2057		0	2301	797	776	0	0	8	7	6 - Established Cirrhosis		2014-11-17	MALE	165	Hepatitis B		Hepatocellular Carcinoma	No	C22.0	8170-03-01	C22.0	YES	120	1	1
TCGA-DD-AACA-02	TCGA-DD-AACA-02	TCGA-DD-AACA	TCGA Liver Cancer (LIHC)	liver hepatocellular carcinoma	Liver	NO	NO	Mild	65	3.8	3.7	5.3	TCGA-DD-AACA-F68364	TCGA-DD-AACA	TCGA-DD-AACA-02A	0.2	0.7		A	0.7	1.5	1.2	-23973	2057		0	2301	797	776	0	0	8	7	6 - Established Cirrhosis		2014-11-17	MALE	165	Hepatitis B		Hepatocellular Carcinoma	No	C22.0	8170-03-01	C22.0	YES	20	1	1
TCGA-DD-AACB-01	TCGA-DD-AACB-01	TCGA-DD-AACB	TCGA Liver Cancer (LIHC)	liver hepatocellular carcinoma	Liver			Mild	74	3.8	4.1	5.3	TCGA-DD-AACB-F68365	TCGA-DD-AACB	TCGA-DD-AACB-01A	0.2	0.8		A	0.7	1.5	1.1	-27103	2045		0	2324			0	0	8	1902	6 - Established Cirrhosis		2014-11-17	FEMALE	156	Hepatitis B		Hepatocellular Carcinoma	No	C22.0	8170-03-01	C22.0	YES	410	1	1
TCGA-DD-AACC-01	TCGA-DD-AACC-01	TCGA-DD-AACC	TCGA Liver Cancer (LIHC)	liver hepatocellular carcinoma	Liver			Mild	61	3.8	3.9	5.3		TCGA-DD-AACC		0.2	0.5		A	0.7	1.5	1.3	-22499		1685	0				0	0	8	24	6 - Established Cirrhosis		2014-06-28	MALE	165	Hepatitis B		Hepatocellular Carcinoma	No	C22.0	8180-03-01	C22.0	YES		1	1
TCGA-DD-AACD-01	TCGA-DD-AACD-01	TCGA-DD-AACD	TCGA Liver Cancer (LIHC)	liver hepatocellular carcinoma	Liver			Mild	48	3.8	3.9	5.3		TCGA-DD-AACD	TCGA-DD-AACD-01A	0.2	0.3	3	A	0.7	1.5	1	-17828	2015	381	0				1	0	8	2	1,2 - Portal Fibrosis		2014-06-28	MALE	182	Hepatitis B		Hepatocellular Carcinoma	No	C22.0	8170-03-01	C22.0	YES	230	1	1
TCGA-DD-AACE-01	TCGA-DD-AACE-01	TCGA-DD-AACE	TCGA Liver Cancer (LIHC)	liver hepatocellular carcinoma	Liver	NO	NO	Mild	62	3.8	4.4	5.3	TCGA-DD-AACE-F68366	TCGA-DD-AACE	TCGA-DD-AACE-01A	0.2	0.9		A	0.7	1.5	1.2	-22727	1973		0	2184		1279	0	0	8	2	6 - Established Cirrhosis		2014-12-30	MALE	162	Hepatitis B		Hepatocellular Carcinoma	No	C22.0	8170-03-01	C22.0	YES	170	1	1
TCGA-DD-AACF-01	TCGA-DD-AACF-01	TCGA-DD-AACF	TCGA Liver Cancer (LIHC)	liver hepatocellular carcinoma	Liver			Mild	68	3.8	3.5	5.3		TCGA-DD-AACF		0.2	0.5		A	0.7	1.5	1.1	-25172		365	0				0	0	8	16	6 - Established Cirrhosis		2014-06-28	MALE	168	Hepatitis C		Hepatocellular Carcinoma	No	C22.0	8170-03-01	C22.0	YES		1	1
TCGA-DD-AACG-01	TCGA-DD-AACG-01	TCGA-DD-AACG	TCGA Liver Cancer (LIHC)	liver hepatocellular carcinoma	Liver			Mild	52	3.8	3.6	5.3		TCGA-DD-AACG	TCGA-DD-AACG-01A	0.2	1		A	0.7	1.5	1.5	-19174	1931	469	0				0	0	8	11718	6 - Established Cirrhosis		2014-06-28	MALE	168	Hepatitis B		Hepatocellular Carcinoma	No	C22.0	8170-03-01	C22.0	YES	280	1	1
TCGA-DD-AACH-01	TCGA-DD-AACH-01	TCGA-DD-AACH	TCGA Liver Cancer (LIHC)	liver hepatocellular carcinoma	Liver			Mild	69	3.8	4.3	5.3		TCGA-DD-AACH		0.2	1.5		A	0.7	15	1.2	-25544		195	0				0	0	8	7	6 - Established Cirrhosis		2014-06-28	MALE	160	Hepatitis B		Hepatocellular Carcinoma	No	C22.0	8170-03-01	C22.0	YES		1	1
TCGA-DD-AACI-01	TCGA-DD-AACI-01	TCGA-DD-AACI	TCGA Liver Cancer (LIHC)	liver hepatocellular carcinoma	Liver	NO	NO	Mild	69	3.8	3.6	5.3	TCGA-DD-AACI-F68367	TCGA-DD-AACI	TCGA-DD-AACI-01A	0.2	0.5		A	0.7	1.5	1	-25236	1870		0	1618		1432	1	0	8	1	5 - Nodular Formation and Incomplete Cirrhosis		2014-11-17	MALE	155			Hepatocellular Carcinoma	No	C22.0	8170-03-01	C22.0	YES	320	1	1
TCGA-DD-AACJ-01	TCGA-DD-AACJ-01	TCGA-DD-AACJ	TCGA Liver Cancer (LIHC)	liver hepatocellular carcinoma	Liver	NO	NO		75	3.8	3.6	5.3	TCGA-DD-AACJ-F68368	TCGA-DD-AACJ	TCGA-DD-AACJ-01A	0.2	1		A	0.7	1.5	1	-27528	1835		0	2102		100	2	0	8	25			2014-11-17	MALE	159			Hepatocellular Carcinoma	No	C22.0	8170-03-01	C22.0	YES	380	1	1
TCGA-DD-AACK-01	TCGA-DD-AACK-01	TCGA-DD-AACK	TCGA Liver Cancer (LIHC)	liver hepatocellular carcinoma	Liver			None	70	3.8	4.6	5.3	TCGA-DD-AACK-F68369	TCGA-DD-AACK	TCGA-DD-AACK-01A	0.2	0.9		A	0.7	1.5	1.3	-25796	1828		0	9			2	0	8	5	6 - Established Cirrhosis		2014-11-17	MALE	172	Hepatitis B		Hepatocellular Carcinoma	No	C22.0	8170-03-01	C22.0	YES	140	1	1
TCGA-DD-AACL-01	TCGA-DD-AACL-01	TCGA-DD-AACL	TCGA Liver Cancer (LIHC)	liver hepatocellular carcinoma	Liver				66	3.8	3.3	5.3	TCGA-DD-AACL-F68370	TCGA-DD-AACL		0.2	0.7		A	0.7	1.5	1	-24355		107	0	58			1	0	8	1368			2014-11-17	FEMALE	150	Hepatitis C		Hepatocellular Carcinoma	No	C22.0	8170-03-01	C22.0	YES		1	1
TCGA-DD-AACM-01	TCGA-DD-AACM-01	TCGA-DD-AACM	TCGA Liver Cancer (LIHC)	liver hepatocellular carcinoma	Liver	NO	NO	Mild	48	3.8	4.2	5.3	TCGA-DD-AACM-F68371	TCGA-DD-AACM		0.2	1.6		A	0.7	1.5	1.2	-17590			0	1769	1126	1097	0	0	8	2	3,4 - Fibrous Speta		2014-11-17	MALE	177	Hepatitis B		Hepatocellular Carcinoma	No	C22.0	8170-03-01	C22.0	YES		1	1
TCGA-DD-AACN-01	TCGA-DD-AACN-01	TCGA-DD-AACN	TCGA Liver Cancer (LIHC)	liver hepatocellular carcinoma	Liver	NO	NO		32	3.8	3.9	5.3	TCGA-DD-AACN-F68372	TCGA-DD-AACN		0.2	2.2		A	0.7	1.5	1.5	-12007			0	1302		357	0	0	9	699			2014-11-17	MALE	171	Hepatitis B		Hepatocellular Carcinoma	No	C22.0	8170-03-01	C22.0	YES		1	1
TCGA-DD-AACO-01	TCGA-DD-AACO-01	TCGA-DD-AACO	TCGA Liver Cancer (LIHC)	liver hepatocellular carcinoma	Liver	NO	NO	Mild	40	3.8	3.7	5.3	TCGA-DD-AACO-F68373	TCGA-DD-AACO	TCGA-DD-AACO-01A	0.2	0.6		A	0.7	1.5	1.4	-14796	1637		0	1876		479	0	0	9	5	6 - Established Cirrhosis		2014-11-17	MALE	164	Hepatitis B		Hepatocellular Carcinoma	No	C22.0	8170-03-01	C22.0	YES	110	1	1
TCGA-DD-AACP-01	TCGA-DD-AACP-01	TCGA-DD-AACP	TCGA Liver Cancer (LIHC)	liver hepatocellular carcinoma	Liver			None	64	3.8	4.1	5.3	TCGA-DD-AACP-F68374	TCGA-DD-AACP	TCGA-DD-AACP-01A	0.2	1.1		A	0.7	1.5	1.1	-23728	1625		0	415			0	0	8	227			2014-11-17	MALE	155	Alcohol consumption		Hepatocellular Carcinoma	No	C22.0	8170-03-01	C22.0	YES	20	1	1
TCGA-DD-AACQ-01	TCGA-DD-AACQ-01	TCGA-DD-AACQ	TCGA Liver Cancer (LIHC)	liver hepatocellular carcinoma	Liver	NO	NO		50	3.8	4.2	5.3	TCGA-DD-AACQ-F68375	TCGA-DD-AACQ	TCGA-DD-AACQ-01A	0.2	0.8		A	0.7	1.5	1.3	-18429	1665	432	0	429		105	0	0	8	7			2014-11-17	MALE	169	Hepatitis B		Hepatocellular Carcinoma	No	C22.0	8170-03-01	C22.0	YES	40	1	1
TCGA-DD-AACS-01	TCGA-DD-AACS-01	TCGA-DD-AACS	TCGA Liver Cancer (LIHC)	liver hepatocellular carcinoma	Liver				39	3.8	4.3	5.3	TCGA-DD-AACS-F68376	TCGA-DD-AACS	TCGA-DD-AACS-01A	0.2	1		A	0.7	1.5	1.1	-14473	1532		0	1804			0	0	8	1			2014-11-17	MALE	172	Hepatitis B		Hepatocellular Carcinoma	No	C22.0	8170-03-01	C22.0	YES	20	1	1
TCGA-DD-AACT-01	TCGA-DD-AACT-01	TCGA-DD-AACT	TCGA Liver Cancer (LIHC)	liver hepatocellular carcinoma	Liver			Mild	69	3.8	4.4	5.3	TCGA-DD-AACT-F68377	TCGA-DD-AACT	TCGA-DD-AACT-01A	0.2	0.8		A	0.7	1.5	0.7	-25292	1317		0	1562			0	0	8	4			2014-11-17	FEMALE	158	Hepatitis B		Hepatocellular Carcinoma	No	C22.0	8170-03-01	C22.0	YES	60	1	1
TCGA-DD-AACU-01	TCGA-DD-AACU-01	TCGA-DD-AACU	TCGA Liver Cancer (LIHC)	liver hepatocellular carcinoma	Liver				59	3.8	4.4	5.3	TCGA-DD-AACU-F68378	TCGA-DD-AACU	TCGA-DD-AACU-01A	0.2	0.3		A	0.7	1.5	1.1	-21606	1272		0	1567			0	0	8	22			2014-11-17	MALE	166	Hepatitis B		Hepatocellular Carcinoma	No	C22.0	8170-03-01	C22.0	YES	40	1	1
TCGA-DD-AACV-01	TCGA-DD-AACV-01	TCGA-DD-AACV	TCGA Liver Cancer (LIHC)	liver hepatocellular carcinoma	Liver	NO	NO		53	3.8	4.3	5.3	TCGA-DD-AACV-F68379	TCGA-DD-AACV		0.2	0.6		A	0.7	1.5	1.2	-19660			0	1531		344	0	0	8	9			2014-11-17	MALE	169	Alcohol consumption		Hepatocellular Carcinoma	No	C22.0	8170-03-01	C22.0	YES		1	1
TCGA-DD-AACW-01	TCGA-DD-AACW-01	TCGA-DD-AACW	TCGA Liver Cancer (LIHC)	liver hepatocellular carcinoma	Liver				43	3.8	4	5.3	TCGA-DD-AACW-F68380	TCGA-DD-AACW	TCGA-DD-AACW-01A	0.2	0.6		A	0.7	1.5	1	-15872	1184		0	1424			0	0	8	1726			2014-11-17	MALE	166	Alcohol consumption|Hepatitis B		Hepatocellular Carcinoma	No	C22.0	8170-03-01	C22.0	YES	40	1	1
TCGA-DD-AACX-01	TCGA-DD-AACX-01	TCGA-DD-AACX	TCGA Liver Cancer (LIHC)	liver hepatocellular carcinoma	Liver	YES	NO	Mild	66	3.8	4.2	5.3	TCGA-DD-AACX-F68381	TCGA-DD-AACX		0.2	0.5		A	0.7	1.5	0.8	-24329			0	170		42	1	0	8	3	3,4 - Fibrous Speta		2014-11-17	MALE	155	Alcohol consumption|Hepatitis B		Hepatocellular Carcinoma	No	C22.0	8170-03-01	C22.0	YES		1	1
TCGA-DD-AACY-01	TCGA-DD-AACY-01	TCGA-DD-AACY	TCGA Liver Cancer (LIHC)	liver hepatocellular carcinoma	Liver	NO	NO	Mild	61	3.8	3.1	5.3	TCGA-DD-AACY-F68382	TCGA-DD-AACY		0.2	1.3		A	0.7	1.5	0.6	-22332			0	1450		776	0	0	8	290	3,4 - Fibrous Speta		2014-11-17	MALE	162	Hepatitis B		Hepatocellular Carcinoma	No	C22.0	8170-03-01	C22.0	YES		1	1
TCGA-DD-AACZ-01	TCGA-DD-AACZ-01	TCGA-DD-AACZ	TCGA Liver Cancer (LIHC)	liver hepatocellular carcinoma	Liver				63	3.8	4.5	5.3		TCGA-DD-AACZ		0.2	0.4		A	0.7	1.5	0.6	-23230		171	0				1	0	8	25			2014-06-29	FEMALE	149			Hepatocellular Carcinoma	No	C22.0	8170-03-01	C22.0	YES		1	1
TCGA-DD-AAD0-01	TCGA-DD-AAD0-01	TCGA-DD-AAD0	TCGA Liver Cancer (LIHC)	liver hepatocellular carcinoma	Liver	NO	NO	Mild	73	3.8	3.4	5.3	TCGA-DD-AAD0-F68383	TCGA-DD-AAD0		0.2	0.8		A	0.7	1.5	0.5	-26781			0	137		47	0	0	8	4			2014-11-17	FEMALE	150	Hepatitis B		Hepatocellular Carcinoma	No	C22.0	8170-03-01	C22.0	YES		1	1
TCGA-DD-AAD1-01	TCGA-DD-AAD1-01	TCGA-DD-AAD1	TCGA Liver Cancer (LIHC)	liver hepatocellular carcinoma	Liver	NO	NO		51	3.8	4.5	5.3	TCGA-DD-AAD1-F68384	TCGA-DD-AAD1		0.2	0.6		A	0.7	1.5	0.5	-18794			0	564		127	1	0	8	451			2014-12-21	FEMALE	161	Hepatitis B|Hepatitis C		Hepatocellular Carcinoma	No	C22.0	8170-03-01	C22.0	YES		1	1
TCGA-DD-AAD2-01	TCGA-DD-AAD2-01	TCGA-DD-AAD2	TCGA Liver Cancer (LIHC)	liver hepatocellular carcinoma	Liver			Mild	66	3.8	3.5	5.3	TCGA-DD-AAD2-F68385	TCGA-DD-AAD2	TCGA-DD-AAD2-01A	0.2	0.3		A	0.7	1.5	0.8	-24221	1105		0	658			0	0	8	25	1,2 - Portal Fibrosis		2014-11-17	MALE	156	Hepatitis B		Hepatocellular Carcinoma	No	C22.0	8170-03-01	C22.0	YES	30	1	1
TCGA-DD-AAD3-01	TCGA-DD-AAD3-01	TCGA-DD-AAD3	TCGA Liver Cancer (LIHC)	liver hepatocellular carcinoma	Liver			Mild	43	3.8	3.9	5.3	TCGA-DD-AAD3-F68386	TCGA-DD-AAD3	TCGA-DD-AAD3-01A	0.2	0.4		A	0.7	1.5	0.8	-15706	1072		0	1295			0				1,2 - Portal Fibrosis		2014-11-17	MALE	178	Alcohol consumption|Hepatitis B		Hepatocellular Carcinoma	No	C22.0	8170-03-01	C22.0	YES	20	1	1
TCGA-DD-AAD5-01	TCGA-DD-AAD5-01	TCGA-DD-AAD5	TCGA Liver Cancer (LIHC)	liver hepatocellular carcinoma	Liver	NO	NO	Mild	54	3.8	3.7	5.3	TCGA-DD-AAD5-F68387	TCGA-DD-AAD5	TCGA-DD-AAD5-01A	0.2	0.6		A	0.7	1.5	0.6	-19748	1058		0	1345		130	0	0	8	73	3,4 - Fibrous Speta		2014-11-17	MALE	170	Alcohol consumption|Hepatitis B		Hepatocellular Carcinoma	No	C22.0	8170-03-01	C22.0	YES	70	1	1
TCGA-DD-AAD6-01	TCGA-DD-AAD6-01	TCGA-DD-AAD6	TCGA Liver Cancer (LIHC)	liver hepatocellular carcinoma	Liver	NO	NO		66	3.8	2.7	5.3	TCGA-DD-AAD6-F68388	TCGA-DD-AAD6	TCGA-DD-AAD6-01A	0.2	0.6		A	0.7	1.5	1.1	-24185	1035		0	672		50	1						2014-11-17	MALE	167	Hepatitis B		Hepatocellular Carcinoma	No	C22.0	8170-03-01	C22.0	YES	70	1	1
TCGA-DD-AAD8-01	TCGA-DD-AAD8-01	TCGA-DD-AAD8	TCGA Liver Cancer (LIHC)	liver hepatocellular carcinoma	Liver			Mild	73	3.8	4.3	5.3	TCGA-DD-AAD8-F68389	TCGA-DD-AAD8	TCGA-DD-AAD8-01A	0.2	0.3		A	0.7	1.5	0.6	-26781	981		0	1219			0	0	8	4	1,2 - Portal Fibrosis		2014-11-17	FEMALE	152	Hepatitis B|Hepatitis C		Hepatocellular Carcinoma	No	C22.0	8170-03-01	C22.0	YES	30	1	1
TCGA-DD-AADA-01	TCGA-DD-AADA-01	TCGA-DD-AADA	TCGA Liver Cancer (LIHC)	liver hepatocellular carcinoma	Liver				66	3.8	4.1	5.3	TCGA-DD-AADA-F68390	TCGA-DD-AADA	TCGA-DD-AADA-01A	0.2	0.5		A	0.7	1.5	0.6	-24288	959		0	1233			0	0	8	8698			2014-11-17	FEMALE	147	Hepatitis B		Hepatocellular Carcinoma	No	C22.0	8170-03-01	C22.0	YES	40	1	1
TCGA-DD-AADB-01	TCGA-DD-AADB-01	TCGA-DD-AADB	TCGA Liver Cancer (LIHC)	liver hepatocellular carcinoma	Liver				51	3.8	4.5	5.3	TCGA-DD-AADB-F68391	TCGA-DD-AADB	TCGA-DD-AADB-01A	0.2	1.5		A	0.7	1.5	0.8	-18728	946		0	1242			0	0	8	419			2014-11-17	MALE	165	Hepatitis B		Hepatocellular Carcinoma	No	C22.0	8170-03-01	C22.0	YES	20	1	1
TCGA-DD-AADC-01	TCGA-DD-AADC-01	TCGA-DD-AADC	TCGA Liver Cancer (LIHC)	liver hepatocellular carcinoma	Liver				53	3.8	3.8	5.3		TCGA-DD-AADC	TCGA-DD-AADC-01A	0.2	0.7		A	0.7	1.5	0.8	-19527	945	425	0				0	0	8	36			2014-07-07	MALE	176	Hepatitis B		Hepatocellular Carcinoma	No	C22.0	8170-03-01	C22.0	YES	40	1	1
TCGA-DD-AADD-01	TCGA-DD-AADD-01	TCGA-DD-AADD	TCGA Liver Cancer (LIHC)	liver hepatocellular carcinoma	Liver				51	3.8	4.1	5.3	TCGA-DD-AADD-F68392	TCGA-DD-AADD	TCGA-DD-AADD-01A	0.2	0.4		A	0.7	1.5	0.9	-18752	931		0	1231			1	0	8	9804			2014-11-17	MALE	168	Hepatitis B		Hepatocellular Carcinoma	No	C22.0	8170-03-01	C22.0	YES	30	1	1
TCGA-DD-AADE-01	TCGA-DD-AADE-01	TCGA-DD-AADE	TCGA Liver Cancer (LIHC)	liver hepatocellular carcinoma	Liver	NO	NO	Mild	50	3.8	3.9	5.3	TCGA-DD-AADE-F68393	TCGA-DD-AADE		0.2	0.5		A	0.7	1.5	1.1	-18482			0	1202		168	0	0	8	7	3,4 - Fibrous Speta		2014-11-17	MALE	166	Hepatitis B		Hepatocellular Carcinoma	No	C22.0	8170-03-01	C22.0	YES		1	1
TCGA-DD-AADF-01	TCGA-DD-AADF-01	TCGA-DD-AADF	TCGA Liver Cancer (LIHC)	liver hepatocellular carcinoma	Liver				64	3.8	3.5	5.3		TCGA-DD-AADF	TCGA-DD-AADF-01A	0.2	1.1		A	0.7	1.5	0.6	-23614	865	115	0				1	0	8	725			2014-07-07	FEMALE	145	Hepatitis B		Hepatocellular Carcinoma	No	C22.0	8170-03-01	C22.0	YES	30	1	1
TCGA-DD-AADG-01	TCGA-DD-AADG-01	TCGA-DD-AADG	TCGA Liver Cancer (LIHC)	liver hepatocellular carcinoma	Liver	NO	NO	Mild	70	3.8	4.2	5.3	TCGA-DD-AADG-F68394	TCGA-DD-AADG	TCGA-DD-AADG-01A	0.2	0.9		A	0.7	1.5	1	-25887	862		0	1145	386	270	0	0	8	2256	3,4 - Fibrous Speta		2014-11-17	MALE	160	Alcohol consumption|Hepatitis B		Hepatocellular Carcinoma	No	C22.0	8170-03-01	C22.0	YES	80	1	1
TCGA-DD-AADI-01	TCGA-DD-AADI-01	TCGA-DD-AADI	TCGA Liver Cancer (LIHC)	liver hepatocellular carcinoma	Liver				43	3.8	3.8	5.3	TCGA-DD-AADI-F68395	TCGA-DD-AADI		0.2	0.5		A	0.7	1.5	0.8	-15928			0	1085			0	0	8	27			2014-11-17	FEMALE	165	Hepatitis B		Hepatocellular Carcinoma	No	C22.0	8170-03-01	C22.0	YES		1	1
TCGA-DD-AADJ-01	TCGA-DD-AADJ-01	TCGA-DD-AADJ	TCGA Liver Cancer (LIHC)	liver hepatocellular carcinoma	Liver				70	3.8	4.2	5.3	TCGA-DD-AADJ-F68396	TCGA-DD-AADJ		0.2	0.6		A	0.7	1.5	0.6	-25863			0	1066			0	0	8	708			2014-11-17	FEMALE	154			Hepatocellular Carcinoma	No	C22.0	8170-03-01	C22.0	YES		1	1
TCGA-DD-AADK-01	TCGA-DD-AADK-01	TCGA-DD-AADK	TCGA Liver Cancer (LIHC)	liver hepatocellular carcinoma	Liver			None	68	3.8	4.4	5.3	TCGA-DD-AADK-F68397	TCGA-DD-AADK		0.2	0.5		A	0.7	1.5	1.2	-25046			0	1049			0	0	8	236	6 - Established Cirrhosis		2014-11-17	FEMALE	150	Hepatitis B		Hepatocellular Carcinoma	No	C22.0	8170-03-01	C22.0	YES		1	1
TCGA-DD-AADL-01	TCGA-DD-AADL-01	TCGA-DD-AADL	TCGA Liver Cancer (LIHC)	liver hepatocellular carcinoma	Liver				58	3.8	3.5	5.3	TCGA-DD-AADL-F68398	TCGA-DD-AADL	TCGA-DD-AADL-01A	0.2	0.5	2	A	0.7	1.5	0.5	-21512	720		0	636			0	0	8	14			2014-11-17	MALE	159	Alcohol consumption|Hepatitis B		Hepatocellular Carcinoma	No	C22.0	8170-03-01	C22.0	YES	20	1	1
TCGA-DD-AADM-01	TCGA-DD-AADM-01	TCGA-DD-AADM	TCGA Liver Cancer (LIHC)	liver hepatocellular carcinoma	Liver				58	3.8	4.1	5.3		TCGA-DD-AADM	TCGA-DD-AADM-01A	0.2	0.5		A	0.7	1.5	0.8	-21349	704	12	0				0	0	8	112			2014-07-07	MALE	159	Alcohol consumption|Hepatitis B		Hepatocellular Carcinoma	No	C22.0	8170-03-01	C22.0	YES	20	1	1
TCGA-DD-AADN-01	TCGA-DD-AADN-01	TCGA-DD-AADN	TCGA Liver Cancer (LIHC)	liver hepatocellular carcinoma	Liver				59	3.8	3.5	5.3	TCGA-DD-AADN-F68400	TCGA-DD-AADN	TCGA-DD-AADN-01A	0.2	1.1		A	0.7	1.5	0.8	-21632	602		0	898			0	0	8	151367			2014-11-17	MALE	160	Alcohol consumption|Hepatitis B		Hepatocellular Carcinoma	No	C22.0	8170-03-01	C22.0	YES	70	1	1
TCGA-DD-AADO-01	TCGA-DD-AADO-01	TCGA-DD-AADO	TCGA Liver Cancer (LIHC)	liver hepatocellular carcinoma	Liver				55	3.8	4.5	5.3	TCGA-DD-AADO-F68401	TCGA-DD-AADO		0.2	0.4		A	0.7	1.5	0.6	-20139			0	453			0	0	8	176037			2014-11-17	MALE	168	Alcohol consumption|Hepatitis B		Hepatocellular Carcinoma	No	C22.0	8170-03-01	C22.0	YES		1	1
TCGA-DD-AADP-01	TCGA-DD-AADP-01	TCGA-DD-AADP	TCGA Liver Cancer (LIHC)	liver hepatocellular carcinoma	Liver				45	3.8	3.7	5.3	TCGA-DD-AADP-F68402	TCGA-DD-AADP	TCGA-DD-AADP-01A	0.2	0.6		A	0.7	1.5	0.5	-16760	161		0	458			0	0	8	9			2014-11-17	MALE	167	Hepatitis B		Hepatocellular Carcinoma	No	C22.0	8170-03-01	C22.0	YES	20	1	1
TCGA-DD-AADQ-01	TCGA-DD-AADQ-01	TCGA-DD-AADQ	TCGA Liver Cancer (LIHC)	liver hepatocellular carcinoma	Liver				59	3.8	4.4	5.3	TCGA-DD-AADQ-F68403	TCGA-DD-AADQ		0.2	0.3		A	0.7	1.5	0.7	-21756			0	436			0	0	8	7			2014-11-17	MALE	165	Alcohol consumption|Hepatitis B		Hepatocellular Carcinoma	No	C22.0	8170-03-01	C22.0	YES		1	1
TCGA-DD-AADR-01	TCGA-DD-AADR-01	TCGA-DD-AADR	TCGA Liver Cancer (LIHC)	liver hepatocellular carcinoma	Liver	NO	NO	Mild	58	3.8	4.4	5.3	TCGA-DD-AADR-F68404	TCGA-DD-AADR		0.2	0.9		A	0.7	1.5	1	-21217			0	2028		2028	0	0	8	3	6 - Established Cirrhosis		2014-11-17	MALE	170	Alcohol consumption|Hepatitis B		Hepatocellular Carcinoma	No	C22.0	8170-03-01	C22.0	YES		1	1
TCGA-DD-AADS-01	TCGA-DD-AADS-01	TCGA-DD-AADS	TCGA Liver Cancer (LIHC)	liver hepatocellular carcinoma	Liver				63	3.8	3.7	5.3	TCGA-DD-AADS-F68405	TCGA-DD-AADS		0.2	0.7	1	A	0.7	1.5	0.9	-23227			0	474			0	0	8	11			2014-11-17	MALE	164	Alcohol consumption|Hepatitis C		Hepatocellular Carcinoma	No	C22.0	8170-03-01	C22.0	YES		1	1
TCGA-DD-AADU-01	TCGA-DD-AADU-01	TCGA-DD-AADU	TCGA Liver Cancer (LIHC)	liver hepatocellular carcinoma	Liver			None	60	3.8	4.3	5.3	TCGA-DD-AADU-F68406	TCGA-DD-AADU		0.2	1.8		A	0.7	1.5	0.8	-21940			0	554			0	0	8	52	3,4 - Fibrous Speta		2014-11-17	MALE	166	Alcohol consumption		Hepatocellular Carcinoma	No	C22.0	8170-03-01	C22.0	YES		1	1
TCGA-DD-AADV-01	TCGA-DD-AADV-01	TCGA-DD-AADV	TCGA Liver Cancer (LIHC)	liver hepatocellular carcinoma	Liver			None	50	3.8	3.8	5.3	TCGA-DD-AADV-F68407	TCGA-DD-AADV	TCGA-DD-AADV-01A	0.2	0.8		A	0.7	1.5	0.9	-18300	286		0	574			0	0	8	11	6 - Established Cirrhosis		2014-11-17	MALE	176	Alcohol consumption|Hepatitis B		Hepatocellular Carcinoma	No	C22.0	8170-03-01	C22.0	YES	20	1	1
TCGA-DD-AADW-01	TCGA-DD-AADW-01	TCGA-DD-AADW	TCGA Liver Cancer (LIHC)	liver hepatocellular carcinoma	Liver	NO	YES	None	48	3.8	4.3	4.3	TCGA-DD-AADW-F68408	TCGA-DD-AADW	TCGA-DD-AADW-01A	0.2	1		A	0.7	1.5	0.8	-17781	287		0	587		386	1	0	8	250	6 - Established Cirrhosis		2014-11-17	MALE	163	Hepatitis B		Hepatocellular Carcinoma	No	C22.0	8170-03-01	C22.0	YES	30	1	1
TCGA-DD-AADY-01	TCGA-DD-AADY-01	TCGA-DD-AADY	TCGA Liver Cancer (LIHC)	liver hepatocellular carcinoma	Liver			None	55	3.8	3.5	5.3	TCGA-DD-AADY-F68409	TCGA-DD-AADY		0.2	0.8		A	0.7	1.5	0.6	-20233			0	555			0	0	8	9	6 - Established Cirrhosis		2014-11-17	FEMALE	161	Hepatitis B		Hepatocellular Carcinoma	No	C22.0	8170-03-01	C22.0	YES		1	1
TCGA-DD-AAE0-01	TCGA-DD-AAE0-01	TCGA-DD-AAE0	TCGA Liver Cancer (LIHC)	liver hepatocellular carcinoma	Liver			Mild	45	3.8	4.8	5.3	TCGA-DD-AAE0-F68410	TCGA-DD-AAE0	TCGA-DD-AAE0-01A	0.2	0.9		A	0.7	1.5	0.5	-16732	314		0	555			0	0	8	8751	3,4 - Fibrous Speta		2014-11-17	FEMALE	159	Hepatitis B		Hepatocellular Carcinoma	No	C22.0	8170-03-01	C22.0	YES	40	1	1
TCGA-DD-AAE1-01	TCGA-DD-AAE1-01	TCGA-DD-AAE1	TCGA Liver Cancer (LIHC)	liver hepatocellular carcinoma	Liver			Mild	52	3.8	4.1	5.3	TCGA-DD-AAE1-F68411	TCGA-DD-AAE1		0.2	0.4		A	0.7	1.5	0.8	-19073			0	552			0	0	8	2693	6 - Established Cirrhosis		2014-11-17	MALE	169	Hepatitis B		Hepatocellular Carcinoma	No	C22.0	8170-03-01	C22.0	YES		1	1
TCGA-DD-AAE2-01	TCGA-DD-AAE2-01	TCGA-DD-AAE2	TCGA Liver Cancer (LIHC)	liver hepatocellular carcinoma	Liver			None	51	3.8	4.4	5.3	TCGA-DD-AAE2-F68412	TCGA-DD-AAE2	TCGA-DD-AAE2-01A	0.2	0.4		A	0.7	1.5	0.8	-18695	337		0	638			0	0	8	41	6 - Established Cirrhosis		2014-11-17	MALE	174	Hepatitis B		Hepatocellular Carcinoma	No	C22.0	8170-03-01	C22.0	YES	20	1	1
TCGA-DD-AAE3-01	TCGA-DD-AAE3-01	TCGA-DD-AAE3	TCGA Liver Cancer (LIHC)	liver hepatocellular carcinoma	Liver			None	50	3.8	4.7	5.3	TCGA-DD-AAE3-F68413	TCGA-DD-AAE3	TCGA-DD-AAE3-01A	0.2	1.1		A	0.7	1.5	0.8	-18271	342		0	566			0	0	8	2	1,2 - Portal Fibrosis		2014-11-17	MALE	165	Alcohol consumption|Hepatitis B		Hepatocellular Carcinoma	No	C22.0	8170-03-01	C22.0	YES	30	1	1
TCGA-DD-AAE4-01	TCGA-DD-AAE4-01	TCGA-DD-AAE4	TCGA Liver Cancer (LIHC)	liver hepatocellular carcinoma	Liver	NO	NO	None	49	3.8	4	5.3	TCGA-DD-AAE4-F68414	TCGA-DD-AAE4		0.2	0.8		A	0.7	1.5	0.5	-18009			0	608		111	0	0	8	7	6 - Established Cirrhosis		2014-11-17	FEMALE	157	Hepatitis B		Hepatocellular Carcinoma	No	C22.0	8170-03-01	C22.0	YES		1	1
TCGA-DD-AAE6-01	TCGA-DD-AAE6-01	TCGA-DD-AAE6	TCGA Liver Cancer (LIHC)	liver hepatocellular carcinoma	Liver	NO	NO	None	59	3.8	4.4	5.3	TCGA-DD-AAE6-F68416	TCGA-DD-AAE6	TCGA-DD-AAE6-01A	0.2	0.9		A	0.7	1.5	0.8	-21764	399		0	141		105	0	0	8	113	6 - Established Cirrhosis		2014-11-17	FEMALE	159			Hepatocellular Carcinoma	No	C22.0	8170-03-01	C22.0	YES	80	1	1
TCGA-DD-AAE7-01	TCGA-DD-AAE7-01	TCGA-DD-AAE7	TCGA Liver Cancer (LIHC)	liver hepatocellular carcinoma	Liver			Severe	72	3.8	4.7	5.3	TCGA-DD-AAE7-F68418	TCGA-DD-AAE7	TCGA-DD-AAE7-01A	0.2	1.1		A	0.7	1.5	0.9	-26568	410		0	644			0	0	8	1	3,4 - Fibrous Speta		2014-11-17	MALE	172	Alcohol consumption|Hepatitis B		Hepatocellular Carcinoma	No	C22.0	8170-03-01	C22.0	YES	20	1	1
TCGA-DD-AAE8-01	TCGA-DD-AAE8-01	TCGA-DD-AAE8	TCGA Liver Cancer (LIHC)	liver hepatocellular carcinoma	Liver	NO	NO		45	3.8	4.3	5.3	TCGA-DD-AAE8-F68419	TCGA-DD-AAE8		0.2	3		A	0.7	1.5	0.6	-16549			0	664		113	0	0	8	3	6 - Established Cirrhosis		2014-11-17	MALE	170	Hepatitis B		Hepatocellular Carcinoma	No	C22.0	8170-03-01	C22.0	YES		1	1
TCGA-DD-AAE9-01	TCGA-DD-AAE9-01	TCGA-DD-AAE9	TCGA Liver Cancer (LIHC)	liver hepatocellular carcinoma	Liver			Mild	69	3.8	4.1	5.3	TCGA-DD-AAE9-F68857	TCGA-DD-AAE9	TCGA-DD-AAE9-01A	0.2	0.7		A	0.7	1.5	0.9	-25451	419		0	722			0	0	8	3	1,2 - Portal Fibrosis		2014-12-21	MALE	165	Alcohol consumption|Hepatitis B		Hepatocellular Carcinoma	No	C22.0	8170-03-01	C22.0	YES	40	1	1
TCGA-DD-AAEA-01	TCGA-DD-AAEA-01	TCGA-DD-AAEA	TCGA Liver Cancer (LIHC)	liver hepatocellular carcinoma	Liver				65	3.8	4.5	5.3	TCGA-DD-AAEA-F68421	TCGA-DD-AAEA		0.2	0.6		A	0.7	1.5	0.9	-24027			0	575			0	0	8	2	1,2 - Portal Fibrosis		2014-11-17	MALE	163	Alcohol consumption|Hepatitis B		Hepatocellular Carcinoma	No	C22.0	8170-03-01	C22.0	YES		1	1
TCGA-DD-AAEB-01	TCGA-DD-AAEB-01	TCGA-DD-AAEB	TCGA Liver Cancer (LIHC)	liver hepatocellular carcinoma	Liver				60	3.8	4.1	5.3	TCGA-DD-AAEB-F68423	TCGA-DD-AAEB	TCGA-DD-AAEB-01A	0.2	0.3		A	0.7	1.5	0.6	-22121	468		0	478			1	0	8	1			2014-11-17	MALE	161	Alcohol consumption|Hepatitis B		Hepatocellular Carcinoma	No	C22.0	8170-03-01	C22.0	YES	70	1	1
TCGA-DD-AAED-01	TCGA-DD-AAED-01	TCGA-DD-AAED	TCGA Liver Cancer (LIHC)	liver hepatocellular carcinoma	Liver	NO	NO	Mild	51	3.8	4	5.3	TCGA-DD-AAED-F68424	TCGA-DD-AAED		0.2	0.6		A	0.7	1.5	0.5	-18722			0	763		198	0	0	8	2405	1,2 - Portal Fibrosis		2014-11-17	MALE	166	Alcohol consumption|Hepatitis B		Hepatocellular Carcinoma	No	C22.0	8170-03-01	C22.0	YES		1	1
TCGA-DD-AAEE-01	TCGA-DD-AAEE-01	TCGA-DD-AAEE	TCGA Liver Cancer (LIHC)	liver hepatocellular carcinoma	Liver	NO	NO	None	55	3.8	4.7	5.3	TCGA-DD-AAEE-F68427	TCGA-DD-AAEE	TCGA-DD-AAEE-01A	0.2	0.8		A	0.7	1.5	0.9	-20396	509		0	810	298	224	0	0	8	3	6 - Established Cirrhosis		2014-11-17	MALE	160	Hepatitis B		Hepatocellular Carcinoma	No	C22.0	8170-03-01	C22.0	YES	40	1	1
TCGA-DD-AAEG-01	TCGA-DD-AAEG-01	TCGA-DD-AAEG	TCGA Liver Cancer (LIHC)	liver hepatocellular carcinoma	Liver			None	59	3.8	3	5.3	TCGA-DD-AAEG-F68430	TCGA-DD-AAEG	TCGA-DD-AAEG-01A	0.2	0.6		A	0.7	1.5	0.6	-21853	529		0	719			0	0	8	1	6 - Established Cirrhosis		2014-11-17	FEMALE	149	No History of Primary Risk Factors		Hepatocellular Carcinoma	No	C22.0	8170-03-01	C22.0	YES	20	1	1
TCGA-DD-AAEH-01	TCGA-DD-AAEH-01	TCGA-DD-AAEH	TCGA Liver Cancer (LIHC)	liver hepatocellular carcinoma	Liver	NO	NO	None	73	3.8	2.9	5.3	TCGA-DD-AAEH-F68431	TCGA-DD-AAEH	TCGA-DD-AAEH-01A	0.2	0.9		A	0.7	1.5	0.6	-26894	553		0	784	660	644	2				1,2 - Portal Fibrosis		2014-11-17	MALE	163			Hepatocellular Carcinoma	No	C22.0	8170-03-01	C22.0	YES	10	1	1
TCGA-DD-AAEI-01	TCGA-DD-AAEI-01	TCGA-DD-AAEI	TCGA Liver Cancer (LIHC)	liver hepatocellular carcinoma	Liver	NO	YES	None	72	3.8	3.6	5.3	TCGA-DD-AAEI-F68433	TCGA-DD-AAEI		0.2	0.5		A	0.7	1.5	0.9	-26465			0	1531		491	0	0	8	24	6 - Established Cirrhosis		2014-11-17	MALE	166	Hepatitis B		Hepatocellular Carcinoma	No	C22.0	8170-03-01	C22.0	YES		1	1
TCGA-DD-AAEK-01	TCGA-DD-AAEK-01	TCGA-DD-AAEK	TCGA Liver Cancer (LIHC)	liver hepatocellular carcinoma	Liver			None	51	3.8	4.1	5.3	TCGA-DD-AAEK-F68434	TCGA-DD-AAEK	TCGA-DD-AAEK-01A	0.2	1		A	0.7	1.5	0.7	-18757	1162		0	1067			0	0	8	5166	6 - Established Cirrhosis		2014-11-17	MALE	169	Hepatitis B		Hepatocellular Carcinoma	No	C22.0	8170-03-01	C22.0	YES	10	1	1
TCGA-DD-AAVP-01	TCGA-DD-AAVP-01	TCGA-DD-AAVP	TCGA Liver Cancer (LIHC)	liver hepatocellular carcinoma	Liver	NO	NO	Severe	48	3.3	4.3	5	TCGA-DD-AAVP-F67571	TCGA-DD-AAVP	TCGA-DD-AAVP-01A	0.2	1.1	1	A	0.7	1.4	1.2	-17833	2467		0	2752		903	0	0	15	2	6 - Established Cirrhosis		2014-11-06	MALE	167	Hepatitis B		Hepatocellular Carcinoma	No	C22.0	8170-03-01	C22.0	YES	100	0.8	1.2
TCGA-DD-AAVQ-01	TCGA-DD-AAVQ-01	TCGA-DD-AAVQ	TCGA Liver Cancer (LIHC)	liver hepatocellular carcinoma	Liver	NO	NO	Severe	38	3.3	3	5.2	TCGA-DD-AAVQ-F67572	TCGA-DD-AAVQ		0.2	1		A	0.7	1.4	1.1	-13911			0	2728		1509	1	0	15	1456	6 - Established Cirrhosis		2014-11-06	MALE	171	Hepatitis B		Hepatocellular Carcinoma	No	C22.0	8170-03-01	C22.0	YES		0.8	1.2
TCGA-DD-AAVR-01	TCGA-DD-AAVR-01	TCGA-DD-AAVR	TCGA Liver Cancer (LIHC)	liver hepatocellular carcinoma	Liver			None	44	3.3	3.6	5.2	TCGA-DD-AAVR-F67574	TCGA-DD-AAVR		0.2	1.2	1	A	0	1.4	1.1	-16157			0	2513			1	0	15	36	6 - Established Cirrhosis		2014-11-06	MALE	165	Hepatitis B		Hepatocellular Carcinoma	No	C22.0	8170-03-01	C22.0	YES		0.8	1.2
TCGA-DD-AAVS-01	TCGA-DD-AAVS-01	TCGA-DD-AAVS	TCGA Liver Cancer (LIHC)	liver hepatocellular carcinoma	Liver			Mild	56	3.3	3	5.2	TCGA-DD-AAVS-F67576	TCGA-DD-AAVS		0.2	1		A	0	1.4	1	-20586			0	1823			1	0	15	50149	3,4 - Fibrous Speta		2014-11-06	MALE	169	Hepatitis B		Hepatocellular Carcinoma	No	C22.0	8170-03-01	C22.0	YES		0.8	1.2
TCGA-DD-AAVU-01	TCGA-DD-AAVU-01	TCGA-DD-AAVU	TCGA Liver Cancer (LIHC)	liver hepatocellular carcinoma	Liver	NO	NO	Mild	46	3.3	4.6	5.2	TCGA-DD-AAVU-F67577	TCGA-DD-AAVU		0.2	0.6		A	0	1.4	1.2	-16889			0	2202		1630	1	0	15	2	3,4 - Fibrous Speta		2014-11-06	MALE	160	Hepatitis B		Hepatocellular Carcinoma	No	C22.0	8170-03-01	C22.0	YES		0.8	1.2
TCGA-DD-AAVV-01	TCGA-DD-AAVV-01	TCGA-DD-AAVV	TCGA Liver Cancer (LIHC)	liver hepatocellular carcinoma	Liver			Mild	56	3.3	4.6	5.2	TCGA-DD-AAVV-F68858	TCGA-DD-AAVV	TCGA-DD-AAVV-01A	0.2	0.9		A	0	1.4	1.3	-20751	2513		0	2455			1	0	15	7	3,4 - Fibrous Speta		2014-12-21	MALE	158	Hepatitis B		Hepatocellular Carcinoma	No	C22.0	8170-03-01	C22.0	YES	70	0.8	1.2
TCGA-DD-AAVW-01	TCGA-DD-AAVW-01	TCGA-DD-AAVW	TCGA Liver Cancer (LIHC)	liver hepatocellular carcinoma	Liver			None	35	3.3	4.6	5.2	TCGA-DD-AAVW-F67582	TCGA-DD-AAVW	TCGA-DD-AAVW-01A	0.2	1.4		A	0.7	1.4	1.1	-12986	2156		0	2317			0	0	15	927	6 - Established Cirrhosis		2014-11-06	MALE	162	Hepatitis B		Hepatocellular Carcinoma	No	C22.0	8170-03-01	C22.0	YES	20	0.8	1.2
TCGA-DD-AAVX-01	TCGA-DD-AAVX-01	TCGA-DD-AAVX	TCGA Liver Cancer (LIHC)	liver hepatocellular carcinoma	Liver	YES	NO	Severe	38	3.3	3.9	5.2	TCGA-DD-AAVX-F67583	TCGA-DD-AAVX	TCGA-DD-AAVX-01A	0.2	1.1	2	A	0.7	1.4	1	-14016	2039		0	1570		393	0	0	15	1	6 - Established Cirrhosis		2014-12-30	MALE	178	Hepatitis B		Hepatocellular Carcinoma	No	C22.0	8170-03-01	C22.0	YES	50	0.8	1.2
TCGA-DD-AAVY-01	TCGA-DD-AAVY-01	TCGA-DD-AAVY	TCGA Liver Cancer (LIHC)	liver hepatocellular carcinoma	Liver			None	56	3.3	3	5.2	TCGA-DD-AAVY-F67586	TCGA-DD-AAVY	TCGA-DD-AAVY-01A	0.2	1	2	A	0.7	1.4	1.2	-20709	1826		0	1970			0	0	15	11	0 - No Fibrosis		2014-11-06	MALE	161	No History of Primary Risk Factors		Hepatocellular Carcinoma	No	C22.0	8170-03-01	C22.0	YES	40	0.8	1.2
TCGA-DD-AAVZ-01	TCGA-DD-AAVZ-01	TCGA-DD-AAVZ	TCGA Liver Cancer (LIHC)	liver hepatocellular carcinoma	Liver			None	38	3.3	3.8	5.2	TCGA-DD-AAVZ-F67588	TCGA-DD-AAVZ		0.2	1	1	A	0.7	1.4	1.2	-14005			0	1900			0	0	15	945	6 - Established Cirrhosis		2014-11-06	MALE	171	Hepatitis B		Hepatocellular Carcinoma	No	C22.0	8170-03-01	C22.0	YES		0.8	1.2
TCGA-DD-AAW0-01	TCGA-DD-AAW0-01	TCGA-DD-AAW0	TCGA Liver Cancer (LIHC)	liver hepatocellular carcinoma	Liver			Mild	54	3.3	4.6	5.2	TCGA-DD-AAW0-F67590	TCGA-DD-AAW0	TCGA-DD-AAW0-01A	0.2	0.2		A	0.7	1.4	1.3	-19981	1737		0	2015			0	0	15	3	3,4 - Fibrous Speta		2014-11-06	MALE	172	Hepatitis B		Hepatocellular Carcinoma	No	C22.0	8170-03-01	C22.0	YES	70	0.8	1.2
TCGA-DD-AAW1-01	TCGA-DD-AAW1-01	TCGA-DD-AAW1	TCGA Liver Cancer (LIHC)	liver hepatocellular carcinoma	Liver			Severe	55	3.3	4	5.3	TCGA-DD-AAW1-F67591	TCGA-DD-AAW1	TCGA-DD-AAW1-01A	0.2	0.7		A	0.7	1.4	1.2	-20288	1703		0	1989			0	0	15	4	6 - Established Cirrhosis		2014-11-06	MALE	167	No History of Primary Risk Factors		Hepatocellular Carcinoma	No	C22.0	8170-03-01	C22.0	YES	40	0.8	1.2
TCGA-DD-AAW2-01	TCGA-DD-AAW2-01	TCGA-DD-AAW2	TCGA Liver Cancer (LIHC)	liver hepatocellular carcinoma	Liver	YES	NO	None	69	3.3	4	5.2	TCGA-DD-AAW2-F67592	TCGA-DD-AAW2	TCGA-DD-AAW2-01A	0.2	0.4	1	A	0.7	1.4	1.1	-25420	1575		0	1855		391	1	0	15	3	6 - Established Cirrhosis		2014-12-30	MALE	156	Non-Alcoholic Fatty Liver Disease		Hepatocellular Carcinoma	No	C22.0	8170-03-01	C22.0	YES	70	0.8	1.2
TCGA-DD-AAW3-01	TCGA-DD-AAW3-01	TCGA-DD-AAW3	TCGA Liver Cancer (LIHC)	liver hepatocellular carcinoma	Liver			None	69	3.3	4.1	5.2	TCGA-DD-AAW3-F67593	TCGA-DD-AAW3		0.2	0.6	1		0	1.4	1	-25254			0	1633			0	0	15	3	0 - No Fibrosis		2014-11-06	MALE	162	No History of Primary Risk Factors		Hepatocellular Carcinoma	No	C22.0	8170-03-01	C22.0	YES
TCGA-ED-A459-01	TCGA-ED-A459-01	TCGA-ED-A459	TCGA Liver Cancer (LIHC)	liver hepatocellular carcinoma	Liver				47	3800	5200	5100	TCGA-ED-A459-F68559	TCGA-ED-A459	TCGA-ED-A459-01A	0.3	1.4			0.7	1.1	1.1	-17402	87		0	910				0	20	267			2014-11-26	MALE	167			Hepatocellular Carcinoma	No	C22.0	8170-03-01	C22.0	YES	1800	0.9	1.3
TCGA-ED-A4XI-01	TCGA-ED-A4XI-01	TCGA-ED-A4XI	TCGA Liver Cancer (LIHC)	liver hepatocellular carcinoma	Liver			None	58	3.8	2.9	5.1	TCGA-ED-A4XI-F68085	TCGA-ED-A4XI	TCGA-ED-A4XI-01A	0.1	1.3			4.1	5.9	54	-21497	70		0	819				0	20	573			2014-11-13	MALE	170	No History of Primary Risk Factors		Hepatocellular Carcinoma	No	C22.0	8170-03-01	C22.0	YES	2000	0.3	1.3
TCGA-ED-A5KG-01	TCGA-ED-A5KG-01	TCGA-ED-A5KG	TCGA Liver Cancer (LIHC)	liver hepatocellular carcinoma	Liver	NO	NO	Severe	60	3.8	6	5.1	TCGA-ED-A5KG-F56100	TCGA-ED-A5KG	TCGA-ED-A5KG-01A	0.1	0.4			4.1	5.8	3.9	-22258	112		0	854		110		0	20	3177			2015-03-30	FEMALE	160	No History of Primary Risk Factors		Hepatocellular Carcinoma	No	C22.0	8170-03-01	C22.0	YES	1810	0.3	1.3
TCGA-ED-A627-01	TCGA-ED-A627-01	TCGA-ED-A627	TCGA Liver Cancer (LIHC)	liver hepatocellular carcinoma	Liver				74				TCGA-ED-A627-F55716	TCGA-ED-A627	TCGA-ED-A627-01A								-27303	157		0	423			2						2014-01-14	MALE	176	Alcohol consumption		Hepatocellular Carcinoma	No	C22.0	8170-03-01	C22.0	YES	1140
TCGA-ED-A66X-01	TCGA-ED-A66X-01	TCGA-ED-A66X	TCGA Liver Cancer (LIHC)	liver hepatocellular carcinoma	Liver	NO		Mild	35	3.8	4.7	5.1	TCGA-ED-A66X-F56838	TCGA-ED-A66X	TCGA-ED-A66X-01A	0.1	9			4.1	5.6	4.5	-12947	89		0	406	124	124		0	20	5840			2014-02-24	MALE	170	Alcohol consumption		Hepatocellular Carcinoma	No	C22.0	8170-03-01	C22.0	YES	2190	0.3	1.3
TCGA-ED-A66Y-01	TCGA-ED-A66Y-01	TCGA-ED-A66Y	TCGA Liver Cancer (LIHC)	liver hepatocellular carcinoma	Liver			Mild	51	3.8	6	5.1	TCGA-ED-A66Y-F56839	TCGA-ED-A66Y	TCGA-ED-A66Y-01A	0.1	1			4.1	5.9	4.4	-18797	75	296	0	7				0	20	12100			2014-02-24	FEMALE	160	No History of Primary Risk Factors		Hepatocellular Carcinoma	No	C22.0	8170-03-01	C22.0	YES	1670	0.3	1.3
TCGA-ED-A7PX-01	TCGA-ED-A7PX-01	TCGA-ED-A7PX	TCGA Liver Cancer (LIHC)	liver hepatocellular carcinoma	Liver			None	48				TCGA-ED-A7PX-F62650	TCGA-ED-A7PX	TCGA-ED-A7PX-01A	0.1	0.9			4.1	5.8	17	-17638	86		0	6				0	20	24			2014-09-30	FEMALE	161	No History of Primary Risk Factors		Hepatocellular Carcinoma	No	C22.0	8170-03-01	C22.0	YES	830
TCGA-ED-A7PY-01	TCGA-ED-A7PY-01	TCGA-ED-A7PY	TCGA Liver Cancer (LIHC)	liver hepatocellular carcinoma	Liver			Mild	20				TCGA-ED-A7PY-F62651	TCGA-ED-A7PY	TCGA-ED-A7PY-01A	0.1	0.6			4	5.8	3.9	-7556	83		0	390				0	20	2			2014-07-23	FEMALE	156	No History of Primary Risk Factors		Hepatocellular Carcinoma	No	C22.0	8170-03-01	C22.0	YES	1380	0.3	1.3
TCGA-ED-A7PZ-01	TCGA-ED-A7PZ-01	TCGA-ED-A7PZ	TCGA Liver Cancer (LIHC)	liver hepatocellular carcinoma	Liver			Mild	61	3.8	4.2	5.1	TCGA-ED-A7PZ-F62652	TCGA-ED-A7PZ	TCGA-ED-A7PZ-01A	0.1	0.9			4	5.8	7	-22601	78		0	6				0	20	2			2014-09-30	MALE	159	No History of Primary Risk Factors		Hepatocellular Carcinoma	No	C22.0	8170-03-01	C22.0	YES	1350	0.3	1.3
TCGA-ED-A7XO-01	TCGA-ED-A7XO-01	TCGA-ED-A7XO	TCGA Liver Cancer (LIHC)	liver hepatocellular carcinoma	Liver		NO	Mild	29	3.8	4.2	5.1	TCGA-ED-A7XO-F65727	TCGA-ED-A7XO	TCGA-ED-A7XO-01A	0.1	0.6			4.1	5.9	4.9	-10828	77		0	427		262		0		4			2014-10-08	MALE	175	No History of Primary Risk Factors		Hepatocellular Carcinoma	No	C22.0	8170-03-01	C22.0	YES	1430
TCGA-ED-A7XP-01	TCGA-ED-A7XP-01	TCGA-ED-A7XP	TCGA Liver Cancer (LIHC)	liver hepatocellular carcinoma	Liver	NO	NO	Mild	53	3.8	6.9	5.1	TCGA-ED-A7XP-F65353	TCGA-ED-A7XP	TCGA-ED-A7XP-01A	0.1	0.1			4.1	5.9	4.8	-19504	62		0	400		187		0	20	18			2014-09-22	FEMALE	157	No History of Primary Risk Factors		Hepatocellular Carcinoma	No	C22.0	8170-03-01	C22.0	YES	780	0.3	1.3
TCGA-ED-A82E-01	TCGA-ED-A82E-01	TCGA-ED-A82E	TCGA Liver Cancer (LIHC)	liver hepatocellular carcinoma	Liver			Mild	60	3.8	4.3	5.1	TCGA-ED-A82E-F65333	TCGA-ED-A82E	TCGA-ED-A82E-01A	0.1	0.4			4.1	5.8	2.8	-22234	78		0	408				0	20	4			2014-09-22	FEMALE	150	No History of Primary Risk Factors		Hepatocellular Carcinoma	No	C22.0	8170-03-01	C22.0	YES	1320	0.3	1.3
TCGA-ED-A8O5-01	TCGA-ED-A8O5-01	TCGA-ED-A8O5	TCGA Liver Cancer (LIHC)	liver hepatocellular carcinoma	Liver			Mild	59	3.8	4.2	5.1	TCGA-ED-A8O5-F67146	TCGA-ED-A8O5	TCGA-ED-A8O5-01A	0.1	0.4			4.1	5.8	3.4	-21648	100		0	406				0	20	498			2014-10-31	FEMALE	165	No History of Primary Risk Factors		Hepatocellular Carcinoma	No	C22.0	8170-03-01	C22.0	YES	950	0.3	1.3
TCGA-ED-A8O6-01	TCGA-ED-A8O6-01	TCGA-ED-A8O6	TCGA Liver Cancer (LIHC)	liver hepatocellular carcinoma	Liver			Mild	50	3.8	2.8	5.1	TCGA-ED-A8O6-F68512	TCGA-ED-A8O6	TCGA-ED-A8O6-01A	0.1	2.3			4.1	5.8	2.8	-18572	97	56	0	6				0	20	3000			2014-11-21	FEMALE	165	No History of Primary Risk Factors		Hepatocellular Carcinoma	No	C22.0	8170-03-01	C22.0	YES	1030	0.3	1.3
TCGA-ED-A97K-01	TCGA-ED-A97K-01	TCGA-ED-A97K	TCGA Liver Cancer (LIHC)	liver hepatocellular carcinoma	Liver			Mild	54	3.8	8	5.1	TCGA-ED-A97K-F68560	TCGA-ED-A97K	TCGA-ED-A97K-01A	0.1	1			4	5.8	4.6	-20073	92		0	6				0	20	3			2014-12-02	MALE	170	Alcohol consumption		Hepatocholangiocarcinoma (Mixed)	No	C22.0	8180-03-01	C22.0	YES	1650	0.3	1.3
TCGA-EP-A12J-01	TCGA-EP-A12J-01	TCGA-EP-A12J	TCGA Liver Cancer (LIHC)	liver hepatocellular carcinoma	Liver				62	3.8	4.2	5.1	TCGA-EP-A12J-F40456	TCGA-EP-A12J	TCGA-EP-A12J-01A	0.2	0.4	1	B	0.7	1.3	0.8	-22997	59		0	570									2013-02-20	MALE	173	Hepatitis C	Sarcoidosis	Hepatocellular Carcinoma	No	C22.0	8170-03-01	C22.0	YES	300
TCGA-EP-A12J-11	TCGA-EP-A12J-11	TCGA-EP-A12J	TCGA Liver Cancer (LIHC)	liver hepatocellular carcinoma	Liver				62	3.8	4.2	5.1	TCGA-EP-A12J-F40456	TCGA-EP-A12J	TCGA-EP-A12J-11A	0.2	0.4	1	B	0.7	1.3	0.8	-22997	59		0	570									2013-02-20	MALE	173	Hepatitis C	Sarcoidosis	Hepatocellular Carcinoma	No	C22.0	8170-03-01	C22.0	YES	410
TCGA-EP-A26S-01	TCGA-EP-A26S-01	TCGA-EP-A26S	TCGA Liver Cancer (LIHC)	liver hepatocellular carcinoma	Liver			Mild	70	3.8	3.5	5.1	TCGA-EP-A26S-F39041	TCGA-EP-A26S	TCGA-EP-A26S-01A	0.2	0.4						-25677	91		0	608			1	0			0 - No Fibrosis		2013-01-09	MALE	168	Alcohol consumption		Hepatocellular Carcinoma	No	C22.0	8170-03-01	C22.0	YES	520	9.5	12.5
TCGA-EP-A26S-11	TCGA-EP-A26S-11	TCGA-EP-A26S	TCGA Liver Cancer (LIHC)	liver hepatocellular carcinoma	Liver			Mild	70	3.8	3.5	5.1	TCGA-EP-A26S-F39041	TCGA-EP-A26S	TCGA-EP-A26S-11A	0.2	0.4						-25677	91		0	608			1	0			0 - No Fibrosis		2013-01-09	MALE	168	Alcohol consumption		Hepatocellular Carcinoma	No	C22.0	8170-03-01	C22.0	YES	1140	9.5	12.5
TCGA-EP-A2KA-01	TCGA-EP-A2KA-01	TCGA-EP-A2KA	TCGA Liver Cancer (LIHC)	liver hepatocellular carcinoma	Liver	NO	YES		52				TCGA-EP-A2KA-F41362	TCGA-EP-A2KA	TCGA-EP-A2KA-01A			2			1	0.7	-19214	106	627	0	111	433	433	0	0		13	1,2 - Portal Fibrosis		2013-03-15	FEMALE	178	No History of Primary Risk Factors		Hepatocellular Carcinoma	No	C22.0	8170-03-01	C22.0	YES	400
TCGA-EP-A2KB-01	TCGA-EP-A2KB-01	TCGA-EP-A2KB	TCGA Liver Cancer (LIHC)	liver hepatocellular carcinoma	Liver	NO	NO		46	3.8	3.8	5.1	TCGA-EP-A2KB-F41390	TCGA-EP-A2KB	TCGA-EP-A2KB-01A	0.2	1.4		A		1		-16835	50	596	0	60		161	1	0	9	2128			2013-03-18	FEMALE	165	Hepatitis C	Cirrhosis, Alcohol abuse	Hepatocellular Carcinoma	No	C22.0	8170-03-01	C22.0	YES	1210
TCGA-EP-A2KC-01	TCGA-EP-A2KC-01	TCGA-EP-A2KC	TCGA Liver Cancer (LIHC)	liver hepatocellular carcinoma	Liver				62	3.6	3.1	4.8	TCGA-EP-A2KC-F17206	TCGA-EP-A2KC	TCGA-EP-A2KC-01A				A				-22677	30	19	0				0	0		43			2011-10-05	MALE	171	Hepatitis C	Liver Cirrhosis, Moderate alcohol use on weekends	Hepatocellular Carcinoma	No	C22.0	8170-03-01	C22.0	YES	260	0.8	1.2
TCGA-EP-A3JL-01	TCGA-EP-A3JL-01	TCGA-EP-A3JL	TCGA Liver Cancer (LIHC)	liver hepatocellular carcinoma	Liver				76	3.2	4.1	4.8	TCGA-EP-A3JL-F37140	TCGA-EP-A3JL	TCGA-EP-A3JL-01A	0	0.6		A	0.6	1.1		-27886	22		0	303			0	0	9	13			2012-11-27	MALE	168	Alcohol consumption		Hepatocellular Carcinoma	No	C22.0	8170-03-01	C22.0	YES	570	0.9	1.1
TCGA-EP-A3RK-01	TCGA-EP-A3RK-01	TCGA-EP-A3RK	TCGA Liver Cancer (LIHC)	liver hepatocellular carcinoma	Liver	YES			73	3.5	4.3	4.8	TCGA-EP-A3RK-F40454	TCGA-EP-A3RK	TCGA-EP-A3RK-01A	0	0.6		A				-26985	14		0	363		320	0	0		7	1,2 - Portal Fibrosis		2013-02-20	MALE	178	Alcohol consumption		Hepatocellular Carcinoma	No	C22.0	8170-03-01	C22.0	YES	1040	0.9	1.2
TCGA-EP-A3RK-11	TCGA-EP-A3RK-11	TCGA-EP-A3RK	TCGA Liver Cancer (LIHC)	liver hepatocellular carcinoma	Liver	YES			73	3.5	4.3	4.8	TCGA-EP-A3RK-F40454	TCGA-EP-A3RK		0	0.6		A				-26985			0	363		320	0	0		7	1,2 - Portal Fibrosis		2013-02-20	MALE	178	Alcohol consumption		Hepatocellular Carcinoma	No	C22.0	8170-03-01	C22.0	YES		0.9	1.2
TCGA-ES-A2HS-01	TCGA-ES-A2HS-01	TCGA-ES-A2HS	TCGA Liver Cancer (LIHC)	liver hepatocellular carcinoma	Liver			Mild	80	3.5	3.8	5		TCGA-ES-A2HS	TCGA-ES-A2HS-01A	0	1.9	0	A	0.8	1.2	0.6	-29268	1113	688	0				1	0	8	1	0 - No Fibrosis		2011-09-28	MALE	180	No History of Primary Risk Factors	No	Hepatocellular Carcinoma	No	C22.0	8170-03-01	C22.0	YES	320	0.8	1.2
TCGA-ES-A2HS-11	TCGA-ES-A2HS-11	TCGA-ES-A2HS	TCGA Liver Cancer (LIHC)	liver hepatocellular carcinoma	Liver			Mild	80	3.5	3.8	5		TCGA-ES-A2HS	TCGA-ES-A2HS-11A	0	1.9	0	A	0.8	1.2	0.6	-29268	1113	688	0				1	0	8	1	0 - No Fibrosis		2011-09-28	MALE	180	No History of Primary Risk Factors	No	Hepatocellular Carcinoma	No	C22.0	8170-03-01	C22.0	YES	230	0.8	1.2
TCGA-ES-A2HT-01	TCGA-ES-A2HT-01	TCGA-ES-A2HT	TCGA Liver Cancer (LIHC)	liver hepatocellular carcinoma	Liver			Mild	54	3.5	4.1	5		TCGA-ES-A2HT	TCGA-ES-A2HT-01A	0	0.6	0	A	0.8	1.2	0.7	-20023	1392	438	0				1	0	10	4	0 - No Fibrosis		2011-09-30	MALE	174	Hepatitis C	no	Hepatocellular Carcinoma	No	C22.0	8170-03-01	C22.0	YES	340	0.3	1.1
TCGA-ES-A2HT-11	TCGA-ES-A2HT-11	TCGA-ES-A2HT	TCGA Liver Cancer (LIHC)	liver hepatocellular carcinoma	Liver			Mild	54	3.5	4.1	5		TCGA-ES-A2HT		0	0.6	0	A	0.8	1.2	0.7	-20023		438	0				1	0	10	4	0 - No Fibrosis		2011-09-30	MALE	174	Hepatitis C	no	Hepatocellular Carcinoma	No	C22.0	8170-03-01	C22.0	YES		0.3	1.1
TCGA-FV-A23B-01	TCGA-FV-A23B-01	TCGA-FV-A23B	TCGA Liver Cancer (LIHC)	liver hepatocellular carcinoma	Liver	NO	NO		70				TCGA-FV-A23B-F45565	TCGA-FV-A23B	TCGA-FV-A23B-01A								-25788	2030	1852	0	987		1453							2013-07-17	FEMALE		Hepatitis C		Hepatocellular Carcinoma	No	C22.0	8170-03-01	C22.0	YES	110
TCGA-FV-A23B-11	TCGA-FV-A23B-11	TCGA-FV-A23B	TCGA Liver Cancer (LIHC)	liver hepatocellular carcinoma	Liver	NO	NO		70				TCGA-FV-A23B-F45565	TCGA-FV-A23B									-25788		1852	0	987		1453							2013-07-17	FEMALE		Hepatitis C		Hepatocellular Carcinoma	No	C22.0	8170-03-01	C22.0	YES
TCGA-FV-A2QQ-01	TCGA-FV-A2QQ-01	TCGA-FV-A2QQ	TCGA Liver Cancer (LIHC)	liver hepatocellular carcinoma	Liver				80				TCGA-FV-A2QQ-F57856	TCGA-FV-A2QQ	TCGA-FV-A2QQ-01A								-29354	71		0	729									2014-03-27	MALE		Alcohol consumption		Hepatocellular Carcinoma	No	C22.0	8170-03-01	C22.0	YES	150
TCGA-FV-A2QR-01	TCGA-FV-A2QR-01	TCGA-FV-A2QR	TCGA Liver Cancer (LIHC)	liver hepatocellular carcinoma	Liver	NO	NO		75				TCGA-FV-A2QR-F42770	TCGA-FV-A2QR	TCGA-FV-A2QR-01A			1						1764	581	0			561							2013-04-30	MALE		Other	Male, IDDM for 30+years	Hepatocellular Carcinoma	No	C22.0	8170-03-01	C22.0	YES	100
TCGA-FV-A2QR-11	TCGA-FV-A2QR-11	TCGA-FV-A2QR	TCGA Liver Cancer (LIHC)	liver hepatocellular carcinoma	Liver	NO	NO		75				TCGA-FV-A2QR-F42770	TCGA-FV-A2QR	TCGA-FV-A2QR-11A			1						1764	581	0			561							2013-04-30	MALE		Other	Male, IDDM for 30+years	Hepatocellular Carcinoma	No	C22.0	8170-03-01	C22.0	YES	30
TCGA-FV-A3I0-01	TCGA-FV-A3I0-01	TCGA-FV-A3I0	TCGA Liver Cancer (LIHC)	liver hepatocellular carcinoma	Liver	YES	NO		76		4.4		TCGA-FV-A3I0-F57854	TCGA-FV-A3I0	TCGA-FV-A3I0-01A		0.4						-28101	70		0	848		159							2014-03-27	FEMALE		No History of Primary Risk Factors		Hepatocholangiocarcinoma (Mixed)	No	C22.0	8171-03-01	C22.0	YES	190
TCGA-FV-A3I0-11	TCGA-FV-A3I0-11	TCGA-FV-A3I0	TCGA Liver Cancer (LIHC)	liver hepatocellular carcinoma	Liver	YES	NO		76		4.4		TCGA-FV-A3I0-F57854	TCGA-FV-A3I0	TCGA-FV-A3I0-11A		0.4						-28101	70		0	848		159							2014-03-27	FEMALE		No History of Primary Risk Factors		Hepatocholangiocarcinoma (Mixed)	No	C22.0	8171-03-01	C22.0	YES	40
TCGA-FV-A3I1-01	TCGA-FV-A3I1-01	TCGA-FV-A3I1	TCGA Liver Cancer (LIHC)	liver hepatocellular carcinoma	Liver				81				TCGA-FV-A3I1-F42771	TCGA-FV-A3I1	TCGA-FV-A3I1-01A									76	247	0	0							0 - No Fibrosis		2013-04-30	FEMALE		Alcohol consumption		Hepatocellular Carcinoma	No	C22.0	8170-03-01	C22.0	YES	70
TCGA-FV-A3I1-11	TCGA-FV-A3I1-11	TCGA-FV-A3I1	TCGA Liver Cancer (LIHC)	liver hepatocellular carcinoma	Liver				81				TCGA-FV-A3I1-F42771	TCGA-FV-A3I1	TCGA-FV-A3I1-11A									76	247	0	0							0 - No Fibrosis		2013-04-30	FEMALE		Alcohol consumption		Hepatocellular Carcinoma	No	C22.0	8170-03-01	C22.0	YES	70
TCGA-FV-A3R2-01	TCGA-FV-A3R2-01	TCGA-FV-A3R2	TCGA Liver Cancer (LIHC)	liver hepatocellular carcinoma	Liver				75				TCGA-FV-A3R2-F47054	TCGA-FV-A3R2	TCGA-FV-A3R2-01A			4					-27530	2555	194	0										2013-08-21	MALE		No History of Primary Risk Factors		Hepatocellular Carcinoma	No	C22.0	8170-03-01	C22.0	YES	120
TCGA-FV-A3R2-11	TCGA-FV-A3R2-11	TCGA-FV-A3R2	TCGA Liver Cancer (LIHC)	liver hepatocellular carcinoma	Liver				75				TCGA-FV-A3R2-F47054	TCGA-FV-A3R2	TCGA-FV-A3R2-11A			4					-27530	2555	194	0										2013-08-21	MALE		No History of Primary Risk Factors		Hepatocellular Carcinoma	No	C22.0	8170-03-01	C22.0	YES	80
TCGA-FV-A3R3-01	TCGA-FV-A3R3-01	TCGA-FV-A3R3	TCGA Liver Cancer (LIHC)	liver hepatocellular carcinoma	Liver				38	3.4	2	5	TCGA-FV-A3R3-F64062	TCGA-FV-A3R3	TCGA-FV-A3R3-01A	0	0.4			0.6	1.3	1.3	-14231	28	366	0	4			1						2014-08-25	FEMALE	161	No History of Primary Risk Factors		Hepatocellular Carcinoma	No	C22.0	8170-03-01	C22.0	YES	90	9.5	11.9
TCGA-FV-A495-01	TCGA-FV-A495-01	TCGA-FV-A495	TCGA Liver Cancer (LIHC)	liver hepatocellular carcinoma	Liver			Mild	51	3.8	4	5		TCGA-FV-A495	TCGA-FV-A495-01A	0.3	1	1		0.6	1.1	1	-18740	56		0	1				0	8	39	3,4 - Fibrous Speta		2013-02-21	FEMALE	172	Hepatitis C		Hepatocellular Carcinoma	No	C22.0	8170-03-01	C22.0	YES	70
TCGA-FV-A496-01	TCGA-FV-A496-01	TCGA-FV-A496	TCGA Liver Cancer (LIHC)	liver hepatocellular carcinoma	Liver			None	84	3.8	2.8	5		TCGA-FV-A496	TCGA-FV-A496-01A	0.3	0.9	3		0.9	1.1	1	-30950	51		0	10				0	8	67	0 - No Fibrosis		2013-02-21	FEMALE	162	No History of Primary Risk Factors		Hepatocellular Carcinoma	No	C22.0	8170-03-01	C22.0	YES	70	0.9	1.1
TCGA-FV-A4ZP-01	TCGA-FV-A4ZP-01	TCGA-FV-A4ZP	TCGA Liver Cancer (LIHC)	liver hepatocellular carcinoma	Liver	NO	NO		78				TCGA-FV-A4ZP-F64063	TCGA-FV-A4ZP	TCGA-FV-A4ZP-01A								-28771	2519	2486	0	1836						20326			2014-08-25	MALE	168	Alcohol consumption		Hepatocellular Carcinoma	No	C22.0	8170-03-01	C22.0	YES	210
TCGA-FV-A4ZQ-01	TCGA-FV-A4ZQ-01	TCGA-FV-A4ZQ	TCGA Liver Cancer (LIHC)	liver hepatocellular carcinoma	Liver				52	3.8	2.4	5		TCGA-FV-A4ZQ	TCGA-FV-A4ZQ-01A	0.2	1.8			0.7	1	1	-19090	224		0	12									2013-03-15	MALE		Hepatitis C		Hepatocellular Carcinoma	No	C22.0	8170-03-01	C22.0	YES	160	2	3
TCGA-G3-A25S-01	TCGA-G3-A25S-01	TCGA-G3-A25S	TCGA Liver Cancer (LIHC)	liver hepatocellular carcinoma	Liver	YES	YES	Mild	64	0.3	0.4	0.5	TCGA-G3-A25S-F33638	TCGA-G3-A25S	TCGA-G3-A25S-01A	0	1.2	0	A	0.6	1.4	1	-23571	707	416	0	37		37	1	0	10	281	6 - Established Cirrhosis	Scheduled Follow-up Submission	2012-07-11	MALE	166	Alcohol consumption		Hepatocellular Carcinoma	No	C22.0	8170-03-01	C22.0	YES	480	0.9	1.1
TCGA-G3-A25T-01	TCGA-G3-A25T-01	TCGA-G3-A25T	TCGA Liver Cancer (LIHC)	liver hepatocellular carcinoma	Liver	NO	NO	None	45	0.3	0.4	0.5	TCGA-G3-A25T-F33639	TCGA-G3-A25T		0	2		A	0.4	1.4	0.7	-16461			0	1553	452	452	0	0	10	7	0 - No Fibrosis	Scheduled Follow-up Submission	2012-07-11	FEMALE	167	Hepatitis C		Hepatocellular Carcinoma	No	C22.0	8170-03-01	C22.0	YES		0.9	1.1
TCGA-G3-A25U-01	TCGA-G3-A25U-01	TCGA-G3-A25U	TCGA Liver Cancer (LIHC)	liver hepatocellular carcinoma	Liver			Mild	63	0.3	0.3	0.5	TCGA-G3-A25U-F33636	TCGA-G3-A25U	TCGA-G3-A25U-01A	0	0.3		A	0.4	1.1	0.5	-23207	1281		0	1636			0	0	10	10	0 - No Fibrosis	Scheduled Follow-up Submission	2012-07-11	FEMALE	153	Hepatitis B		Hepatocellular Carcinoma	No	C22.0	8170-03-01	C22.0	YES	350	0.9	1.1
TCGA-G3-A25V-01	TCGA-G3-A25V-01	TCGA-G3-A25V	TCGA Liver Cancer (LIHC)	liver hepatocellular carcinoma	Liver	NO	NO	None	68	0.3	0.4	0.5	TCGA-G3-A25V-F40088	TCGA-G3-A25V	TCGA-G3-A25V-01A	0	0.6	0	A	0.6	1.4	0.7	-25144	223		0	860		489	2	0	10	15	6 - Established Cirrhosis		2013-02-12	MALE	187	Alcohol consumption		Hepatocellular Carcinoma	No	C22.0	8170-03-01	C22.0	YES	100	0.9	1.1
TCGA-G3-A25W-01	TCGA-G3-A25W-01	TCGA-G3-A25W	TCGA Liver Cancer (LIHC)	liver hepatocellular carcinoma	Liver			None	79	0.3	0.4	0.5	TCGA-G3-A25W-F40230	TCGA-G3-A25W	TCGA-G3-A25W-01A	0	0.3	3	A	0.4	1.1	1.5	-29018	419		0	935			0	0	9	6	0 - No Fibrosis		2013-02-14	FEMALE	157	No History of Primary Risk Factors		Hepatocellular Carcinoma	No	C22.0	8170-03-01	C22.0	YES	260	0.8	1.2
TCGA-G3-A25W-11	TCGA-G3-A25W-11	TCGA-G3-A25W	TCGA Liver Cancer (LIHC)	liver hepatocellular carcinoma	Liver			None	79	0.3	0.4	0.5	TCGA-G3-A25W-F40230	TCGA-G3-A25W	TCGA-G3-A25W-11A	0	0.3	3	A	0.4	1.1	1.5	-29018	419		0	935			0	0	9	6	0 - No Fibrosis		2013-02-14	FEMALE	157	No History of Primary Risk Factors		Hepatocellular Carcinoma	No	C22.0	8170-03-01	C22.0	YES	440	0.8	1.2
TCGA-G3-A25X-01	TCGA-G3-A25X-01	TCGA-G3-A25X	TCGA Liver Cancer (LIHC)	liver hepatocellular carcinoma	Liver			Mild	73	0.3	0.4	0.5	TCGA-G3-A25X-F33634	TCGA-G3-A25X	TCGA-G3-A25X-01A	0	1.1		A	0.4	1.4	0.8	-26988	1346		0	1779			0	0	10	11	1,2 - Portal Fibrosis	Scheduled Follow-up Submission	2012-07-11	MALE	165	Hepatitis B		Hepatocellular Carcinoma	No	C22.0	8170-03-01	C22.0	YES	160	0.9	1.1
TCGA-G3-A25X-11	TCGA-G3-A25X-11	TCGA-G3-A25X	TCGA Liver Cancer (LIHC)	liver hepatocellular carcinoma	Liver			Mild	73	0.3	0.4	0.5	TCGA-G3-A25X-F33634	TCGA-G3-A25X	TCGA-G3-A25X-11A	0	1.1		A	0.4	1.4	0.8	-26988	1346		0	1779			0	0	10	11	1,2 - Portal Fibrosis	Scheduled Follow-up Submission	2012-07-11	MALE	165	Hepatitis B		Hepatocellular Carcinoma	No	C22.0	8170-03-01	C22.0	YES	220	0.9	1.1
TCGA-G3-A25Y-01	TCGA-G3-A25Y-01	TCGA-G3-A25Y	TCGA Liver Cancer (LIHC)	liver hepatocellular carcinoma	Liver	NO	NO	Mild	52	0.3	0.4	0.5	TCGA-G3-A25Y-F40098	TCGA-G3-A25Y	TCGA-G3-A25Y-01A	0	0.7		A	0.4	1.1	0.6	-19055	1595	452	0			355	0	0	10	35	3,4 - Fibrous Speta		2013-02-12	FEMALE	158	Hepatitis B		Hepatocellular Carcinoma	No	C22.0	8170-03-01	C22.0	YES	440	0.9	1.1
TCGA-G3-A25Z-01	TCGA-G3-A25Z-01	TCGA-G3-A25Z	TCGA Liver Cancer (LIHC)	liver hepatocellular carcinoma	Liver			Mild	58	0.3	0.4	0.5	TCGA-G3-A25Z-F33635	TCGA-G3-A25Z	TCGA-G3-A25Z-01A	0	0.9	1	A	0.6	1.4	1.1	-21509	233		0	655			0	0	15	44	5 - Nodular Formation and Incomplete Cirrhosis	Scheduled Follow-up Submission	2012-07-11	MALE	173	Hepatitis B		Hepatocellular Carcinoma	No	C22.0	8170-03-01	C22.0	YES	300	0.9	1.1
TCGA-G3-A3CG-01	TCGA-G3-A3CG-01	TCGA-G3-A3CG	TCGA Liver Cancer (LIHC)	liver hepatocellular carcinoma	Liver	YES	NO	Severe	80	0.3	0.4	0.5	TCGA-G3-A3CG-F40228	TCGA-G3-A3CG	TCGA-G3-A3CG-01A	0.3	0.3		A	0.6	1.4	0.9	-29432	261		0	673		329	1	0	10	67	6 - Established Cirrhosis		2013-02-14	MALE	168	Hepatitis C		Hepatocellular Carcinoma	Yes	C22.0	8170-03-01	C22.0	YES	270	0.9	1.1
TCGA-G3-A3CH-01	TCGA-G3-A3CH-01	TCGA-G3-A3CH	TCGA Liver Cancer (LIHC)	liver hepatocellular carcinoma	Liver	NO	NO	Severe	53	0.3	0.3	0.5	TCGA-G3-A3CH-F40093	TCGA-G3-A3CH	TCGA-G3-A3CH-01A	0	0.7		A	0.6	1.4	0.9	-19473	296		0	780	180	116	0	0	10	41	6 - Established Cirrhosis		2013-02-12	MALE	178	Hepatitis B		Hepatocellular Carcinoma	No	C22.0	8170-03-01	C22.0	YES	120	0.9	1.1
TCGA-G3-A3CH-11	TCGA-G3-A3CH-11	TCGA-G3-A3CH	TCGA Liver Cancer (LIHC)	liver hepatocellular carcinoma	Liver	NO	NO	Severe	53	0.3	0.3	0.5	TCGA-G3-A3CH-F40093	TCGA-G3-A3CH		0	0.7		A	0.6	1.4	0.9	-19473			0	780	180	116	0	0	10	41	6 - Established Cirrhosis		2013-02-12	MALE	178	Hepatitis B		Hepatocellular Carcinoma	No	C22.0	8170-03-01	C22.0	YES		0.9	1.1
TCGA-G3-A3CI-01	TCGA-G3-A3CI-01	TCGA-G3-A3CI	TCGA Liver Cancer (LIHC)	liver hepatocellular carcinoma	Liver			Mild	71	0.3	0.4	0.5	TCGA-G3-A3CI-F40231	TCGA-G3-A3CI	TCGA-G3-A3CI-01A	0	0.3		A	0.6	1.4	0.9	-26224	258		0	180			1	0	10	2	0 - No Fibrosis		2013-02-14	MALE	167	Non-Alcoholic Fatty Liver Disease		Hepatocellular Carcinoma	No	C22.0	8170-03-01	C22.0	YES	370	0.9	1.1
TCGA-G3-A3CJ-01	TCGA-G3-A3CJ-01	TCGA-G3-A3CJ	TCGA Liver Cancer (LIHC)	liver hepatocellular carcinoma	Liver	YES	NO	Severe	52	0.3	0.4	0.5	TCGA-G3-A3CJ-F40234	TCGA-G3-A3CJ	TCGA-G3-A3CJ-01A	0	1		A	0.5	1.4	0.8	-19305	113		0	594		296	0	0	10	3	5 - Nodular Formation and Incomplete Cirrhosis		2013-02-14	MALE	174	Hepatitis C		Hepatocellular Carcinoma	No	C22.0	8170-03-01	C22.0	YES	20	0.9	1.1
TCGA-G3-A3CK-01	TCGA-G3-A3CK-01	TCGA-G3-A3CK	TCGA Liver Cancer (LIHC)	liver hepatocellular carcinoma	Liver			Mild	61	0.3	0.2	0.5	TCGA-G3-A3CK-F40227	TCGA-G3-A3CK	TCGA-G3-A3CK-01A	0	0.8	1	A	0.6	1.4	1.1	-22462	132		0	585			0	0	10	3	6 - Established Cirrhosis		2013-02-14	MALE	170	Hepatitis B		Hepatocellular Carcinoma	No	C22.0	8170-03-01	C22.0	YES	520	0.9	1.1
TCGA-G3-A5SI-01	TCGA-G3-A5SI-01	TCGA-G3-A5SI	TCGA Liver Cancer (LIHC)	liver hepatocellular carcinoma	Liver			Mild	44	3.3	2.8	4.8	TCGA-G3-A5SI-F59276	TCGA-G3-A5SI		0	0.7		A	0.6	1.4	0.4	-16126		768	0	447			1	0	10	9	6 - Established Cirrhosis		2014-05-07	MALE	177	Hepatitis C		Hepatocellular Carcinoma	No	C22.0	8170-03-01	C22.0	YES		0.9	1.1
TCGA-G3-A5SJ-01	TCGA-G3-A5SJ-01	TCGA-G3-A5SJ	TCGA Liver Cancer (LIHC)	liver hepatocellular carcinoma	Liver			Mild	59	3.3	4.1	4.8	TCGA-G3-A5SJ-F62744	TCGA-G3-A5SJ	TCGA-G3-A5SJ-01A	0	0.5		B	0.6	1.4	1.3	-21848	285		0	698			0	0	10	3	6 - Established Cirrhosis		2014-07-24	MALE	171	Alcohol consumption|Hepatitis C		Hepatocellular Carcinoma	No	C22.0	8170-03-01	C22.0	YES	290	0.9	1.1
TCGA-G3-A5SK-01	TCGA-G3-A5SK-01	TCGA-G3-A5SK	TCGA Liver Cancer (LIHC)	liver hepatocellular carcinoma	Liver	NO	NO	Mild	58	3.3	3.3	4.8	TCGA-G3-A5SK-F62745	TCGA-G3-A5SK	TCGA-G3-A5SK-01A				A	0.6	1.4	0.6	-21320	251		0	744		483	0				6 - Established Cirrhosis		2014-07-24	MALE	169	Hepatitis C		Hepatocellular Carcinoma	No	C22.0	8170-03-01	C22.0	YES	650	0.9	1.1
TCGA-G3-A5SL-01	TCGA-G3-A5SL-01	TCGA-G3-A5SL	TCGA Liver Cancer (LIHC)	liver hepatocellular carcinoma	Liver			None	70	3.1	4.2	4.7	TCGA-G3-A5SL-F62747	TCGA-G3-A5SL	TCGA-G3-A5SL-01A	0	0.8			0.6	1.4	1	-25671	236		0	621			0	0	10	4	0 - No Fibrosis		2014-07-24	MALE	180	Alcohol consumption		Hepatocellular Carcinoma	No	C22.0	8170-03-01	C22.0	YES	220	0.9	1.3
TCGA-G3-A5SM-01	TCGA-G3-A5SM-01	TCGA-G3-A5SM	TCGA Liver Cancer (LIHC)	liver hepatocellular carcinoma	Liver	NO	NO		58	3.3	3.2	4.8	TCGA-G3-A5SM-F62748	TCGA-G3-A5SM	TCGA-G3-A5SM-01A	0	0.6		A	0.5	1.4	0.5	-21236	111		0	520		252	1	0	10	12	6 - Established Cirrhosis		2014-07-24	MALE	184	Alcohol consumption|Hepatitis C		Hepatocellular Carcinoma	No	C22.0	8170-03-01	C22.0	YES	160	0.9	1.1
TCGA-G3-A6UC-01	TCGA-G3-A6UC-01	TCGA-G3-A6UC	TCGA Liver Cancer (LIHC)	liver hepatocellular carcinoma	Liver	NO	NO	Mild	65	3.3	4.6	4.8	TCGA-G3-A6UC-F64551	TCGA-G3-A6UC	TCGA-G3-A6UC-01A	0	1		A	0.6	1.4	0.9	-23793	266		0	671		639	0	0	10	4	6 - Established Cirrhosis		2014-09-04	MALE	182	Alcohol consumption		Hepatocellular Carcinoma	No	C22.0	8170-03-01	C22.0	YES	410	0.9	1.1
TCGA-G3-A7M5-01	TCGA-G3-A7M5-01	TCGA-G3-A7M5	TCGA Liver Cancer (LIHC)	liver hepatocellular carcinoma	Liver			None	76	3.3	4.1	4.8	TCGA-G3-A7M5-F65810	TCGA-G3-A7M5	TCGA-G3-A7M5-01A	0	0.5		A	0.6	1.4	1.9	-27963	217		0	447			0	0	10	6	0 - No Fibrosis		2014-09-30	MALE	164	Alcohol consumption		Hepatocellular Carcinoma	No	C22.0	8170-03-01	C22.0	YES	720	0.9	1.1
TCGA-G3-A7M6-01	TCGA-G3-A7M6-01	TCGA-G3-A7M6	TCGA Liver Cancer (LIHC)	liver hepatocellular carcinoma	Liver	NO	NO	Mild	60	3.3	3.6	4.8	TCGA-G3-A7M6-F67241	TCGA-G3-A7M6	TCGA-G3-A7M6-01A	0	0.5		A	0.4	1.1	0.6	-22205	212		0	632		584	0	0	10	24	1,2 - Portal Fibrosis		2014-11-03	FEMALE	158	Hepatitis C		Hepatocellular Carcinoma	No	C22.0	8170-03-01	C22.0	YES	680	0.9	1.1
TCGA-G3-A7M7-01	TCGA-G3-A7M7-01	TCGA-G3-A7M7	TCGA Liver Cancer (LIHC)	liver hepatocellular carcinoma	Liver			Severe	65	3.2	3.5	4.6	TCGA-G3-A7M7-F67243	TCGA-G3-A7M7	TCGA-G3-A7M7-01A	0	0.5		A	0.7	1.2	0.6	-24002	112		0	361			0	0	7	4	3,4 - Fibrous Speta		2014-11-03	MALE	181	Alcohol consumption		Hepatocellular Carcinoma	No	C22.0	8170-03-01	C22.0	YES	750	0.9	1.1
TCGA-G3-A7M8-01	TCGA-G3-A7M8-01	TCGA-G3-A7M8	TCGA Liver Cancer (LIHC)	liver hepatocellular carcinoma	Liver				31	3.3	3.5	4.8	TCGA-G3-A7M8-F65814	TCGA-G3-A7M8	TCGA-G3-A7M8-01A	0	1.8		A	0.6	1.4	0.7	-11527	97		0	430			0	0	10	5	6 - Established Cirrhosis		2014-09-30	MALE		Alcohol consumption		Hepatocellular Carcinoma	No	C22.0	8170-03-01	C22.0	YES	180	0.9	1.1
TCGA-G3-A7M9-01	TCGA-G3-A7M9-01	TCGA-G3-A7M9	TCGA Liver Cancer (LIHC)	liver hepatocellular carcinoma	Liver			None	70	3.3	3.3	4.8	TCGA-G3-A7M9-F65815	TCGA-G3-A7M9	TCGA-G3-A7M9-01A	0	0.4		A	0.6	1.4	1	-25588	86	56	0				0	0	10	22868	6 - Established Cirrhosis		2014-09-30	MALE	170	Hemochromatosis		Hepatocellular Carcinoma	No	C22.0	8170-03-01	C22.0	YES	1500	0.9	1.1
TCGA-G3-AAUZ-01	TCGA-G3-AAUZ-01	TCGA-G3-AAUZ	TCGA Liver Cancer (LIHC)	liver hepatocellular carcinoma	Liver			Severe	48	3.3	3.8	4.8	TCGA-G3-AAUZ-F67244	TCGA-G3-AAUZ		0	0.3		A	0.6	1.4	0.8	-17760			0	480			0	0	10	3	1,2 - Portal Fibrosis		2014-11-03	MALE	160	Hepatitis B|Non-Alcoholic Fatty Liver Disease		Hepatocellular Carcinoma	No	C22.0	8170-03-01	C22.0	YES		0.9	1.1
TCGA-G3-AAV0-01	TCGA-G3-AAV0-01	TCGA-G3-AAV0	TCGA Liver Cancer (LIHC)	liver hepatocellular carcinoma	Liver			None	58	3.3	4.2	4.8	TCGA-G3-AAV0-F67245	TCGA-G3-AAV0		0	0.6		A	0.6	1.4	0.9	-21249			0	476			0	0	10	4	0 - No Fibrosis		2014-11-03	MALE	158	Hepatitis B		Hepatocellular Carcinoma	No	C22.0	8170-03-01	C22.0	YES		0.9	1.1
TCGA-G3-AAV1-01	TCGA-G3-AAV1-01	TCGA-G3-AAV1	TCGA Liver Cancer (LIHC)	liver hepatocellular carcinoma	Liver	NO	NO	Severe	51	3.3	3.2	4.8	TCGA-G3-AAV1-F65936	TCGA-G3-AAV1		0	0.7		B	0.6	1.4	0.7	-18973		359	0			49	1	0	10	8	6 - Established Cirrhosis		2014-10-01	MALE	181	Hepatitis B		Hepatocellular Carcinoma	No	C22.0	8170-03-01	C22.0	YES		0.9	1.1
TCGA-G3-AAV2-01	TCGA-G3-AAV2-01	TCGA-G3-AAV2	TCGA Liver Cancer (LIHC)	liver hepatocellular carcinoma	Liver				50	3.3	4.2	4.8	TCGA-G3-AAV2-F67246	TCGA-G3-AAV2	TCGA-G3-AAV2-01A	0	0.7		A	0.6	1.4	1	-18363	136		0	372			0	0	10	4	6 - Established Cirrhosis		2014-11-03	MALE		Alcohol consumption|Hepatitis C		Hepatocellular Carcinoma	No	C22.0	8170-03-01	C22.0	YES	500	0.9	1.1
TCGA-G3-AAV3-01	TCGA-G3-AAV3-01	TCGA-G3-AAV3	TCGA Liver Cancer (LIHC)	liver hepatocellular carcinoma	Liver			Severe	58	3.4	4.4	4.8	TCGA-G3-AAV3-F67247	TCGA-G3-AAV3	TCGA-G3-AAV3-01A	0	0.6	1	A	0.5	0.9	0.6	-21449	98		0	412			1	0	7	5	6 - Established Cirrhosis		2014-11-03	FEMALE	168	Alcohol consumption|Hepatitis C|Non-Alcoholic Fatty Liver Disease		Hepatocellular Carcinoma	No	C22.0	8170-03-01	C22.0	YES	150	0.9	1.1
TCGA-G3-AAV4-01	TCGA-G3-AAV4-01	TCGA-G3-AAV4	TCGA Liver Cancer (LIHC)	liver hepatocellular carcinoma	Liver				83	3.3	2.7	4.8	TCGA-G3-AAV4-F65940	TCGA-G3-AAV4	TCGA-G3-AAV4-01A	0	0.8	2	A	0.4	1.1	1.1	-30466	423	27	0				0	0	10	4	3,4 - Fibrous Speta		2014-10-01	FEMALE	156	Hepatitis B		Hepatocellular Carcinoma	No	C22.0	8170-03-01	C22.0	YES	470	0.9	1.1
TCGA-G3-AAV5-01	TCGA-G3-AAV5-01	TCGA-G3-AAV5	TCGA Liver Cancer (LIHC)	liver hepatocellular carcinoma	Liver	YES	NO		67	3.3	4.2	4.8	TCGA-G3-AAV5-F65955	TCGA-G3-AAV5		0	0.4		A	0.6	1.4	0.8	-24655			0	354		117	1				6 - Established Cirrhosis		2014-10-01	MALE	165	Alcohol consumption		Hepatocellular Carcinoma	No	C22.0	8170-03-01	C22.0	YES		0.9	1.1
TCGA-G3-AAV6-01	TCGA-G3-AAV6-01	TCGA-G3-AAV6	TCGA Liver Cancer (LIHC)	liver hepatocellular carcinoma	Liver	NO	NO	Severe	53	3.4	3.9	5.2	TCGA-G3-AAV6-F65959	TCGA-G3-AAV6		0	1.6		A	0.6	1.4	0.9	-19556		65	0			44	0	0	10	57875	0 - No Fibrosis		2014-10-01	FEMALE	165	No History of Primary Risk Factors		Hepatocellular Carcinoma	No	C22.0	8170-03-01	C22.0	YES		0.8	1.2
TCGA-G3-AAV7-01	TCGA-G3-AAV7-01	TCGA-G3-AAV7	TCGA Liver Cancer (LIHC)	liver hepatocellular carcinoma	Liver			Mild	38	3.3	4	4.8	TCGA-G3-AAV7-F67249	TCGA-G3-AAV7	TCGA-G3-AAV7-01A	0	0.9		A	0.6	1.4	1.1	-14229	52		0	361			0	0	10	3	5 - Nodular Formation and Incomplete Cirrhosis		2014-11-03	MALE	165	Hepatitis B		Hepatocellular Carcinoma	No	C22.0	8170-03-01	C22.0	YES	120	0.9	1.1
TCGA-GJ-A3OU-01	TCGA-GJ-A3OU-01	TCGA-GJ-A3OU	TCGA Liver Cancer (LIHC)	liver hepatocellular carcinoma	Liver				59	3.5	3.2	5	TCGA-GJ-A3OU-F70294	TCGA-GJ-A3OU	TCGA-GJ-A3OU-01A	0	0.9	1		0.6	1.4	0.6	-21671	69		0	879		879		0	25	8			2015-03-27	MALE	167	Alcohol consumption|Non-Alcoholic Fatty Liver Disease|Other	hepatic cirrhosis	Hepatocellular Carcinoma	No	C22.0	8174-03-01	C22.0	YES	130	0.8	1.2
TCGA-GJ-A6C0-01	TCGA-GJ-A6C0-01	TCGA-GJ-A6C0	TCGA Liver Cancer (LIHC)	liver hepatocellular carcinoma	Liver				75					TCGA-GJ-A6C0	TCGA-GJ-A6C0-01A			1					-27626	310	31	0										2013-11-27	FEMALE	160	No History of Primary Risk Factors		Hepatocellular Carcinoma	No	C22.0	8170-03-01	C22.0	YES	170
TCGA-GJ-A9DB-01	TCGA-GJ-A9DB-01	TCGA-GJ-A9DB	TCGA Liver Cancer (LIHC)	liver hepatocellular carcinoma	Liver				68	3.5	4.5	5		TCGA-GJ-A9DB	TCGA-GJ-A9DB-01A	0	0.5	1		0.8	1.4	1.1	-25020	132	67	0										2014-05-07	MALE	187	No History of Primary Risk Factors		Hepatocellular Carcinoma	No	C22.0	8170-03-01	C22.0	YES	540	0.7	1.2
TCGA-HP-A5MZ-01	TCGA-HP-A5MZ-01	TCGA-HP-A5MZ	TCGA Liver Cancer (LIHC)	liver hepatocellular carcinoma	Liver				78				TCGA-HP-A5MZ-F64772	TCGA-HP-A5MZ	TCGA-HP-A5MZ-01A					62	120	124	-22702		91	0										2014-09-11	MALE	185	No History of Primary Risk Factors		Hepatocellular Carcinoma	No	C22.0	8170-03-01	C22.0	YES	160	0.9	1.1
TCGA-HP-A5N0-01	TCGA-HP-A5N0-01	TCGA-HP-A5N0	TCGA Liver Cancer (LIHC)	liver hepatocellular carcinoma	Liver	NO	NO	None	90	3.5	2.6	4.8	TCGA-HP-A5N0-F70727	TCGA-HP-A5N0	TCGA-HP-A5N0-01A			3		0	0.9	0.5	-32120		1147	0			179	0				0 - No Fibrosis		2015-03-02	FEMALE	156	No History of Primary Risk Factors		Hepatocellular Carcinoma	No	C22.0	8174-03-01	C22.0	YES	350	0.9	1.2
TCGA-K7-A5RF-01	TCGA-K7-A5RF-01	TCGA-K7-A5RF	TCGA Liver Cancer (LIHC)	liver hepatocellular carcinoma	Liver				64				TCGA-K7-A5RF-F64037	TCGA-K7-A5RF	TCGA-K7-A5RF-01A								-23557	102		0	631						5			2014-08-25	MALE	177	Hepatitis C		Hepatocellular Carcinoma	No	C22.0	8170-03-01	C22.0	YES	1350
TCGA-K7-A5RG-01	TCGA-K7-A5RG-01	TCGA-K7-A5RG	TCGA Liver Cancer (LIHC)	liver hepatocellular carcinoma	Liver				66				TCGA-K7-A5RG-F64039	TCGA-K7-A5RG	TCGA-K7-A5RG-01A			1					-24218	100		0	519						19			2014-08-25	MALE	173	Alcohol consumption|Hepatitis C		Hepatocellular Carcinoma	No	C22.0	8170-03-01	C22.0	YES	630
TCGA-K7-A6G5-01	TCGA-K7-A6G5-01	TCGA-K7-A6G5	TCGA Liver Cancer (LIHC)	liver hepatocellular carcinoma	Liver				66				TCGA-K7-A6G5-F64040	TCGA-K7-A6G5	TCGA-K7-A6G5-01A								-24233	31		0	512			0						2014-08-25	MALE	184	Alcohol consumption|Hepatitis B|Hepatitis C|Hemochromatosis		Hepatocellular Carcinoma	No	C22.0	8170-03-01	C22.0	YES	60
TCGA-K7-AAU7-01	TCGA-K7-AAU7-01	TCGA-K7-AAU7	TCGA Liver Cancer (LIHC)	liver hepatocellular carcinoma	Liver				61				TCGA-K7-AAU7-F70895	TCGA-K7-AAU7				2	A				-22476			0	359		58	0	0	10	290			2015-03-10	MALE		Hepatitis C|Hemochromatosis		Hepatocholangiocarcinoma (Mixed)	No	C22.0	8180-03-01	C22.0	YES		0	1.9
TCGA-KR-A7K0-01	TCGA-KR-A7K0-01	TCGA-KR-A7K0	TCGA Liver Cancer (LIHC)	liver hepatocellular carcinoma	Liver				65	3.5	2.8	4.9		TCGA-KR-A7K0		0.2	1.3			0.7	1.3	0.7	-23974		65	0					0	8	11			2014-05-28	MALE	174	Alcohol consumption|Hepatitis C		Hepatocellular Carcinoma	No	C22.0	8170-03-01	C22.0	YES
TCGA-KR-A7K2-01	TCGA-KR-A7K2-01	TCGA-KR-A7K2	TCGA Liver Cancer (LIHC)	liver hepatocellular carcinoma	Liver				64	3.5	3.3	4.9	TCGA-KR-A7K2-F72748	TCGA-KR-A7K2	TCGA-KR-A7K2-01A	0.2	1.5			0.7	1.3	1.1	-23699	85		0	829				0	8	14			2015-11-24	MALE	166	Hepatitis C		Hepatocholangiocarcinoma (Mixed)	No	C22.0	8180-03-01	C22.0	YES	70
TCGA-KR-A7K7-01	TCGA-KR-A7K7-01	TCGA-KR-A7K7	TCGA Liver Cancer (LIHC)	liver hepatocellular carcinoma	Liver	YES	NO		61	3.5	3.4	4.9	TCGA-KR-A7K7-F71440	TCGA-KR-A7K7	TCGA-KR-A7K7-01A	0.2	1.4			0.5	1	0.8	-22587	461		0	951		239		0	8	308836			2015-03-25	FEMALE	168	No History of Primary Risk Factors		Hepatocellular Carcinoma	No	C22.0	8170-03-01	C22.0	YES	140
TCGA-KR-A7K8-01	TCGA-KR-A7K8-01	TCGA-KR-A7K8	TCGA Liver Cancer (LIHC)	liver hepatocellular carcinoma	Liver			None	57	3.5	3.3	4.9	TCGA-KR-A7K8-F71274	TCGA-KR-A7K8	TCGA-KR-A7K8-01A	0.2	1.9	1		0.7	1.3	1.1	-20914	435		0	906				0	8	154			2015-03-24	MALE	170	No History of Primary Risk Factors		Hepatocellular Carcinoma	No	C22.0	8170-03-01	C22.0	YES	80
TCGA-LG-A6GG-01	TCGA-LG-A6GG-01	TCGA-LG-A6GG	TCGA Liver Cancer (LIHC)	liver hepatocellular carcinoma	Liver			None	79	3.4	3.7	4.8	TCGA-LG-A6GG-F59890	TCGA-LG-A6GG	TCGA-LG-A6GG-01A	0.2	0.8		A	0.4	1.1	0.6	-28871	35		0	387			0						2014-05-22	FEMALE	158	Other	Cryptogenic Cirrhosis	Hepatocellular Carcinoma	No	C22.0	8170-03-01	C22.0	YES	1140	9.4	12.2
TCGA-LG-A9QC-01	TCGA-LG-A9QC-01	TCGA-LG-A9QC	TCGA Liver Cancer (LIHC)	liver hepatocellular carcinoma	Liver			Mild	48	3.5	4.7	5	TCGA-LG-A9QC-F69223	TCGA-LG-A9QC	TCGA-LG-A9QC-01A	0.2	2.8	1		0.5	1.3	0.8	-17842	62		0	425									2014-12-30	MALE	188	No History of Primary Risk Factors		Hepatocellular Carcinoma	No	C22.0	8170-03-01	C22.0	YES	1080	9.4	12.2
TCGA-LG-A9QD-01	TCGA-LG-A9QD-01	TCGA-LG-A9QD	TCGA Liver Cancer (LIHC)	liver hepatocellular carcinoma	Liver			Mild	68	3.4	2.9	4.8	TCGA-LG-A9QD-F69200	TCGA-LG-A9QD	TCGA-LG-A9QD-01A	0	0.5	3		0.7	1.5	0.9	-24969	28		0	366									2014-12-30	MALE	168	No History of Primary Risk Factors		Hepatocellular Carcinoma	No	C22.0	8170-03-01	C22.0	YES	1580
TCGA-MI-A75C-01	TCGA-MI-A75C-01	TCGA-MI-A75C	TCGA Liver Cancer (LIHC)	liver hepatocellular carcinoma	Liver				64	3.5	4	4.9	TCGA-MI-A75C-F62894	TCGA-MI-A75C		0.2	1.1		A	0.6	1.3	1	-23441			0	291			1	0	9	4			2014-07-28	MALE	175	Hepatitis C		Hepatocellular Carcinoma	No	C22.0	8170-03-01	C22.0	YES
TCGA-MI-A75E-01	TCGA-MI-A75E-01	TCGA-MI-A75E	TCGA Liver Cancer (LIHC)	liver hepatocellular carcinoma	Liver				61	3.5	3	4.9	TCGA-MI-A75E-F62895	TCGA-MI-A75E	TCGA-MI-A75E-01A	0.2	1.1	1	A	0.6	1.3		-22457	157		0	507			1	0	9	5	1,2 - Portal Fibrosis		2014-07-28	MALE	175	Alcohol consumption|Hepatitis C		Hepatocellular Carcinoma	No	C22.0	8170-03-01	C22.0	YES	80
TCGA-MI-A75G-01	TCGA-MI-A75G-01	TCGA-MI-A75G	TCGA Liver Cancer (LIHC)	liver hepatocellular carcinoma	Liver				63	3.5	2.3	4.9	TCGA-MI-A75G-F58603	TCGA-MI-A75G	TCGA-MI-A75G-01A	0.2	1.7	1	B	0.6	1.3	0.5	-23284	427		0	698			1	0	9	6	6 - Established Cirrhosis		2014-07-28	MALE	178	Alcohol consumption|Hepatitis C		Hepatocellular Carcinoma	No	C22.0	8170-03-01	C22.0	YES	80
TCGA-MI-A75H-01	TCGA-MI-A75H-01	TCGA-MI-A75H	TCGA Liver Cancer (LIHC)	liver hepatocellular carcinoma	Liver	NO	NO		77	3.5	3.3	4.9	TCGA-MI-A75H-F68684	TCGA-MI-A75H	TCGA-MI-A75H-01A	0.2	2.3		B	0.6	1.3		-28371	287		0	747		307	1	0	9	11	6 - Established Cirrhosis		2015-01-09	MALE	173	Hepatitis C		Hepatocellular Carcinoma	No	C22.0	8170-03-01	C22.0	YES	30
TCGA-MI-A75I-01	TCGA-MI-A75I-01	TCGA-MI-A75I	TCGA Liver Cancer (LIHC)	liver hepatocellular carcinoma	Liver				61				TCGA-MI-A75I-F62897	TCGA-MI-A75I	TCGA-MI-A75I-01A			3	A				-22341	665		0	630		265	1						2014-07-28	MALE	188	Hepatitis C		Hepatocellular Carcinoma	No	C22.0	8170-03-01	C22.0	YES	50
TCGA-MR-A520-01	TCGA-MR-A520-01	TCGA-MR-A520	TCGA Liver Cancer (LIHC)	liver hepatocellular carcinoma	Liver				58				TCGA-MR-A520-F48052	TCGA-MR-A520	TCGA-MR-A520-01A								-21398	106		0	229									2012-09-14	MALE	179	Other	Moderate alcohol consumption, anti TB drug used for TB positive testing	Hepatocellular Carcinoma	No	C22.0	8170-03-01	C22.0	YES	270
TCGA-MR-A8JO-01	TCGA-MR-A8JO-01	TCGA-MR-A8JO	TCGA Liver Cancer (LIHC)	liver hepatocellular carcinoma	Liver				34	3.9	4.1	5.1	TCGA-MR-A8JO-F58923	TCGA-MR-A8JO	TCGA-MR-A8JO-01A	0.2	0.8						-12669	184		0	330						2			2014-04-28	MALE	196	Alcohol consumption		Fibrolamellar Carcinoma	No	C22.0	8171-03-01	C22.0	YES	350
TCGA-NI-A4U2-01	TCGA-NI-A4U2-01	TCGA-NI-A4U2	TCGA Liver Cancer (LIHC)	liver hepatocellular carcinoma	Liver			None	71					TCGA-NI-A4U2	TCGA-NI-A4U2-01A			3				0.8	-26011	2802	1791	0				0			5	1,2 - Portal Fibrosis		2013-06-28	MALE	171	Alcohol consumption		Hepatocellular Carcinoma	No	C22.0	8170-03-01	C22.0	YES	320
TCGA-NI-A8LF-01	TCGA-NI-A8LF-01	TCGA-NI-A8LF	TCGA Liver Cancer (LIHC)	liver hepatocellular carcinoma	Liver			None	74		1.2		TCGA-NI-A8LF-F69826	TCGA-NI-A8LF	TCGA-NI-A8LF-01A		0.6	1				15	-27162	422		0	799			1						2015-01-21	MALE	171	Alcohol consumption		Hepatocellular Carcinoma	No	C22.0	8170-03-01	C22.0	YES	240
TCGA-O8-A75V-01	TCGA-O8-A75V-01	TCGA-O8-A75V	TCGA Liver Cancer (LIHC)	liver hepatocellular carcinoma	Liver			Mild	54	2.9	3.8	4.4	TCGA-O8-A75V-F66431	TCGA-O8-A75V	TCGA-O8-A75V-01A	0.3	1.9	1	A	0.5	1.5	1	-19850	142		0	538				0	7	7	6 - Established Cirrhosis		2014-10-16	MALE	180	Alcohol consumption|Hepatitis B|Hepatitis C		Hepatocellular Carcinoma	No	C22.0	8170-03-01	C22.0	YES	270	9.3	13.1
TCGA-PD-A5DF-01	TCGA-PD-A5DF-01	TCGA-PD-A5DF	TCGA Liver Cancer (LIHC)	liver hepatocellular carcinoma	Liver				58					TCGA-PD-A5DF	TCGA-PD-A5DF-01A								-21414	1906	639	0										2013-04-30	FEMALE	167	No History of Primary Risk Factors		Hepatocellular Carcinoma	No	C22.0	8170-03-01	C22.0	YES	140
TCGA-QA-A7B7-01	TCGA-QA-A7B7-01	TCGA-QA-A7B7	TCGA Liver Cancer (LIHC)	liver hepatocellular carcinoma	Liver		NO	Mild	48	3.5	4.2	4.8	TCGA-QA-A7B7-F65031	TCGA-QA-A7B7		0.3	1		A	0.7	1.2	1	-17636			0	94		88	1	0	8	1751	0 - No Fibrosis		2014-10-30	MALE	180	Hepatitis B		Hepatocellular Carcinoma	No	C22.0	8170-03-01	C22.0	YES		10.4	13.1
TCGA-RC-A6M3-01	TCGA-RC-A6M3-01	TCGA-RC-A6M3	TCGA Liver Cancer (LIHC)	liver hepatocellular carcinoma	Liver				24					TCGA-RC-A6M3									-8899			0	0									2015-07-09	MALE	175			Hepatocellular Carcinoma	No	C22.0	8170-03-01	C22.0	YES
TCGA-RC-A6M4-01	TCGA-RC-A6M4-01	TCGA-RC-A6M4	TCGA Liver Cancer (LIHC)	liver hepatocellular carcinoma	Liver				74	3.5	2.3	4.8		TCGA-RC-A6M4		0.2	0.6	2	A	0.8	1.3	0.9	-27327			0	22			1	0	44	5			2015-07-09	FEMALE		No History of Primary Risk Factors		Hepatocellular Carcinoma	No	C22.0	8170-03-01	C22.0	YES
TCGA-RC-A6M5-01	TCGA-RC-A6M5-01	TCGA-RC-A6M5	TCGA Liver Cancer (LIHC)	liver hepatocellular carcinoma	Liver				20	3.5	3.9	4.8		TCGA-RC-A6M5	TCGA-RC-A6M5-01A	0.2	0.5		A	0.8	1.3	0.4	-7634	484		0	15									2015-07-09	FEMALE		No History of Primary Risk Factors		Fibrolamellar Carcinoma	No	C22.0	8171-03-01	C22.0	YES	50	0.9	1.2
TCGA-RC-A6M6-01	TCGA-RC-A6M6-01	TCGA-RC-A6M6	TCGA Liver Cancer (LIHC)	liver hepatocellular carcinoma	Liver				75	3.5	2.8	4.8		TCGA-RC-A6M6	TCGA-RC-A6M6-01A	0.2	2.3		B	0.8	1.3	0.8	-27649	748		0	9				0	44	12986			2015-07-09	MALE		Alcohol consumption		Hepatocellular Carcinoma	No	C22.0	8170-03-01	C22.0	YES	110	0.9	1.2
TCGA-RC-A7S9-01	TCGA-RC-A7S9-01	TCGA-RC-A7S9	TCGA Liver Cancer (LIHC)	liver hepatocellular carcinoma	Liver			Mild	47	3.1	4.3	5.2		TCGA-RC-A7S9	TCGA-RC-A7S9-01A	0.1	0.8		A	0.3	1.2	0.7	-17403	383		0	640			0	0	20	10	6 - Established Cirrhosis		2014-07-21	FEMALE	161	Hepatitis B		Hepatocellular Carcinoma	No	C22.0	8170-03-01	C22.0	YES	20	0.8	1.3
TCGA-RC-A7SB-01	TCGA-RC-A7SB-01	TCGA-RC-A7SB	TCGA Liver Cancer (LIHC)	liver hepatocellular carcinoma	Liver			None	53	3.1	4.8	5.2		TCGA-RC-A7SB		0.1	3.7		B	0.3	1.2	1.1	-19698			0	588			0	0	20	3	0 - No Fibrosis		2014-07-21	MALE	166	Hepatitis B		Hepatocellular Carcinoma	No	C22.0	8170-03-01	C22.0	YES		0.8	1.3
TCGA-RC-A7SF-01	TCGA-RC-A7SF-01	TCGA-RC-A7SF	TCGA Liver Cancer (LIHC)	liver hepatocellular carcinoma	Liver			None	66	3.1	4.4	5.2		TCGA-RC-A7SF	TCGA-RC-A7SF-01A	0.1	0.8		A	0.3	1.2	1	-24432	285		0	579			0	0	20	87	3,4 - Fibrous Speta		2014-07-21	MALE	170	Hepatitis C		Hepatocellular Carcinoma	No	C22.0	8170-03-01	C22.0	YES	20	0.8	1.3
TCGA-RC-A7SH-01	TCGA-RC-A7SH-01	TCGA-RC-A7SH	TCGA Liver Cancer (LIHC)	liver hepatocellular carcinoma	Liver			None	42	3.1	4.1	5.2		TCGA-RC-A7SH	TCGA-RC-A7SH-01A	0.1	0.5		A	0.3	1.2	0.8	-15560	271		0	468			1	0	20	2466	3,4 - Fibrous Speta		2014-07-21	MALE	174	Hepatitis B		Hepatocellular Carcinoma	No	C22.0	8174-03-01	C22.0	YES	10	0.8	1.3
TCGA-RC-A7SK-01	TCGA-RC-A7SK-01	TCGA-RC-A7SK	TCGA Liver Cancer (LIHC)	liver hepatocellular carcinoma	Liver			None	59	3.1	4.3	5.2		TCGA-RC-A7SK	TCGA-RC-A7SK-01A	0.1	0.6		A	0.3	1.2	1	-21814	232		0	472			0	0	20	25	1,2 - Portal Fibrosis		2014-07-21	MALE	169	Hepatitis C		Hepatocellular Carcinoma	No	C22.0	8170-03-01	C22.0	YES	40	0.8	1.3
TCGA-RG-A7D4-01	TCGA-RG-A7D4-01	TCGA-RG-A7D4	TCGA Liver Cancer (LIHC)	liver hepatocellular carcinoma	Liver				69	3	3	5	TCGA-RG-A7D4-F71159	TCGA-RG-A7D4	TCGA-RG-A7D4-01A	1	1	2	A	1	2	1	-25302	530		0	1098				0	9	5650			2015-03-19	MALE	172	Hepatitis C		Hepatocellular Carcinoma	No	C22.0	8170-03-01	C22.0	YES	250	1	2
TCGA-T1-A6J8-01	TCGA-T1-A6J8-01	TCGA-T1-A6J8	TCGA Liver Cancer (LIHC)	liver hepatocellular carcinoma	Liver				68				TCGA-T1-A6J8-F68334	TCGA-T1-A6J8	TCGA-T1-A6J8-01A								-24853	77		0	23									2014-11-14	MALE	188	Alcohol consumption		Hepatocellular Carcinoma	No	C22.0	8170-03-01	C22.0	YES	340
TCGA-UB-A7MA-01	TCGA-UB-A7MA-01	TCGA-UB-A7MA	TCGA Liver Cancer (LIHC)	liver hepatocellular carcinoma	Liver	YES	NO	None	62	3.4	4	5	TCGA-UB-A7MA-F67133	TCGA-UB-A7MA	TCGA-UB-A7MA-01A	0	1.2		A	0.4	0.9	0.7	-22843	109		0	848		478	0	0	8	2008	0 - No Fibrosis		2015-11-24	FEMALE	165	No History of Primary Risk Factors		Hepatocholangiocarcinoma (Mixed)	No	C22.0	8180-03-01	C22.0	YES	500	0.9	1.2
TCGA-UB-A7MB-01	TCGA-UB-A7MB-01	TCGA-UB-A7MB	TCGA Liver Cancer (LIHC)	liver hepatocellular carcinoma	Liver	YES	NO	None	24	3.5	3.1	4.8	TCGA-UB-A7MB-F67159	TCGA-UB-A7MB	TCGA-UB-A7MB-01A	0.2	0.4		A	0.7	1.2	0.4	-8951	176		0	601		48	0	0	8	1865	0 - No Fibrosis		2014-10-31	MALE	180	No History of Primary Risk Factors		Hepatocellular Carcinoma	No	C22.0	8170-03-01	C22.0	YES	140	0.9	1.2
TCGA-UB-A7MC-01	TCGA-UB-A7MC-01	TCGA-UB-A7MC	TCGA Liver Cancer (LIHC)	liver hepatocellular carcinoma	Liver	NO	YES	Mild	59	3.5	3.9	4.8	TCGA-UB-A7MC-F67161	TCGA-UB-A7MC	TCGA-UB-A7MC-01A	0.2	1.5		A	0.7	1.2	0.7	-21733	88		0	500		359	0	0	8	126	1,2 - Portal Fibrosis		2014-10-31	MALE	176	Alcohol consumption|Hepatitis B		Hepatocellular Carcinoma	No	C22.0	8170-03-01	C22.0	YES	540	0.9	1.2
TCGA-UB-A7MD-01	TCGA-UB-A7MD-01	TCGA-UB-A7MD	TCGA Liver Cancer (LIHC)	liver hepatocellular carcinoma	Liver				67	3.5	3.5	4.8	TCGA-UB-A7MD-F63729	TCGA-UB-A7MD	TCGA-UB-A7MD-01A	0.2	0.8		A	0.7	1.2	1	-24717	128	52	0				0	0	8	23	6 - Established Cirrhosis		2014-08-15	MALE	175	Alcohol consumption|Hepatitis C		Hepatocellular Carcinoma	No	C22.0	8170-03-01	C22.0	YES	140	0.9	1.2
TCGA-UB-A7ME-01	TCGA-UB-A7ME-01	TCGA-UB-A7ME	TCGA Liver Cancer (LIHC)	liver hepatocellular carcinoma	Liver			Mild	51	3.5	4.2	4.8	TCGA-UB-A7ME-F67165	TCGA-UB-A7ME		0.2	0.6		B	0.7	1.2	1.1	-18846			0	486			0	0	8	1388	1,2 - Portal Fibrosis		2014-10-31	MALE	165	Hepatitis B		Hepatocellular Carcinoma	No	C22.0	8170-03-01	C22.0	YES		0.9	1.2
TCGA-UB-A7MF-01	TCGA-UB-A7MF-01	TCGA-UB-A7MF	TCGA Liver Cancer (LIHC)	liver hepatocellular carcinoma	Liver				56	3.5	3.6	4.8		TCGA-UB-A7MF	TCGA-UB-A7MF-01A	0.2	1.1	1	A	0.7	1.2	0.9	-20815	240	214	0					0	8	2505	6 - Established Cirrhosis		2014-08-16	MALE	195	Hepatitis B|Hepatitis C		Hepatocellular Carcinoma	No	C22.0	8170-03-01	C22.0	YES	380	0.9	1.2
TCGA-UB-AA0U-01	TCGA-UB-AA0U-01	TCGA-UB-AA0U	TCGA Liver Cancer (LIHC)	liver hepatocellular carcinoma	Liver	NO	YES	Mild	60	3.5	3.9	4.8	TCGA-UB-AA0U-F67166	TCGA-UB-AA0U	TCGA-UB-AA0U-01A	0.2	0.7	2	A	0.7	1.2	0.6	-21985	18		0	327		106	0	0	8	26	0 - No Fibrosis		2014-10-31	MALE	178	Non-Alcoholic Fatty Liver Disease		Hepatocellular Carcinoma	No	C22.0	8170-03-01	C22.0	YES	730	0.9	1.2
TCGA-UB-AA0V-01	TCGA-UB-AA0V-01	TCGA-UB-AA0V	TCGA Liver Cancer (LIHC)	liver hepatocellular carcinoma	Liver			Mild	69	3.5	3.8	4.8	TCGA-UB-AA0V-F67169	TCGA-UB-AA0V	TCGA-UB-AA0V-01A	0.2	1	1	A	0.5	1	0.7	-25340	7		0	314			0	0	8	3	0 - No Fibrosis		2014-10-31	FEMALE	175	Hemochromatosis		Hepatocellular Carcinoma	No	C22.0	8170-03-01	C22.0	YES	110	0.9	1.2
TCGA-WJ-A86L-01	TCGA-WJ-A86L-01	TCGA-WJ-A86L	TCGA Liver Cancer (LIHC)	liver hepatocellular carcinoma	Liver			None	68	3.4	4.2	4.8	TCGA-WJ-A86L-F65568	TCGA-WJ-A86L	TCGA-WJ-A86L-01A	0.1	0.5		A	0.5	1.1	0.9	-25018	95		0	345			1		6	16	0 - No Fibrosis		2014-09-26	FEMALE	159	No History of Primary Risk Factors		Hepatocellular Carcinoma	No	C22.0	8310-03-01	C22.0	YES	270	2	3
TCGA-WQ-A9G7-01	TCGA-WQ-A9G7-01	TCGA-WQ-A9G7	TCGA Liver Cancer (LIHC)	liver hepatocellular carcinoma	Liver				71	3.5	3.5	5	TCGA-WQ-A9G7-F66632	TCGA-WQ-A9G7	TCGA-WQ-A9G7-01A	0.3	0.7			0.4	1	0.4		165		0	30									2014-10-21	FEMALE	157	No History of Primary Risk Factors		Hepatocellular Carcinoma	No	C22.0	8170-03-01	C22.0	YES	160	0.8	1.2
TCGA-WQ-AB4B-01	TCGA-WQ-AB4B-01	TCGA-WQ-AB4B	TCGA Liver Cancer (LIHC)	liver hepatocellular carcinoma	Liver	NO	NO		62	3.5	3.3	5	TCGA-WQ-AB4B-F66633	TCGA-WQ-AB4B		0.3	1.7		A	0.4	1.2	1.1	-22769			0	395		273		0	15	5			2014-10-21	MALE	175	Alcohol consumption|Non-Alcoholic Fatty Liver Disease|Other	Hepatic Encephalopathy	Hepatocellular Carcinoma	No	C22.0	8170-03-01	C22.0	YES		0.8	1.2
TCGA-WX-AA44-01	TCGA-WX-AA44-01	TCGA-WX-AA44	TCGA Liver Cancer (LIHC)	liver hepatocellular carcinoma	Liver			None	64	3.5	4.4	5	TCGA-WX-AA44-F68251	TCGA-WX-AA44	TCGA-WX-AA44-01A	0	0.5		A	0.5	1.2	0.6	-23654	924		0	615			1	0	6	48	6 - Established Cirrhosis		2014-11-14	FEMALE	152	Non-Alcoholic Fatty Liver Disease		Hepatocellular Carcinoma	No	C22.0	8170-03-01	C22.0	YES	90	0.9	1.2
TCGA-WX-AA46-01	TCGA-WX-AA46-01	TCGA-WX-AA46	TCGA Liver Cancer (LIHC)	liver hepatocellular carcinoma	Liver			None	61	3.5	4.6	5	TCGA-WX-AA46-F68250	TCGA-WX-AA46	TCGA-WX-AA46-01A	0	1.3	3	A	0.5	1.2	1.2	-22639	456		0	756			0	0	6	1	0 - No Fibrosis		2014-11-14	MALE	156	No History of Primary Risk Factors		Hepatocellular Carcinoma	No	C22.0	8170-03-01	C22.0	YES	80	0.8	1.1
TCGA-WX-AA47-01	TCGA-WX-AA47-01	TCGA-WX-AA47	TCGA Liver Cancer (LIHC)	liver hepatocellular carcinoma	Liver			Mild	33	3.5	2.8	5		TCGA-WX-AA47	TCGA-WX-AA47-01A		0.2		A	0.5	1.2	0.6	-12056	626	556	0				2	0	6	1	0 - No Fibrosis		2014-06-10	FEMALE	168	No History of Primary Risk Factors		Hepatocellular Carcinoma	No	C22.0	8170-03-01	C22.0	YES	60	0.8	1.1
TCGA-XR-A8TC-01	TCGA-XR-A8TC-01	TCGA-XR-A8TC	TCGA Liver Cancer (LIHC)	liver hepatocellular carcinoma	Liver			Mild	43	3.5	3.9	4.8	TCGA-XR-A8TC-F72317	TCGA-XR-A8TC	TCGA-XR-A8TC-01A	0.2	0.2		A	0.7	1.5	0.7	-15817	908		0	1339			0	6	6	47	6 - Established Cirrhosis		2015-05-20	FEMALE	155	Hepatitis B		Hepatocellular Carcinoma	Yes	C22.0	8170-03-01	C22.0	YES	110	1.3	1.3
TCGA-XR-A8TD-01	TCGA-XR-A8TD-01	TCGA-XR-A8TD	TCGA Liver Cancer (LIHC)	liver hepatocellular carcinoma	Liver	NO	NO	None	49	3.5	3.8	4.8	TCGA-XR-A8TD-F72319	TCGA-XR-A8TD		0.2	0.7		A	0.7	1.5	0.5	-17908			0	1030			1	6	6	188	0 - No Fibrosis		2015-05-20	FEMALE	156	No History of Primary Risk Factors		Hepatocellular Carcinoma	No	C22.0	8174-03-01	C22.0	YES		0	1.3
TCGA-XR-A8TE-01	TCGA-XR-A8TE-01	TCGA-XR-A8TE	TCGA Liver Cancer (LIHC)	liver hepatocellular carcinoma	Liver	YES	NO	None	16	3.2	3.9	4.5	TCGA-XR-A8TE-F72321	TCGA-XR-A8TE						0.7	1.5	0.4	-5862			0	925	244	210	0	6	6	809	0 - No Fibrosis		2015-05-20	MALE	157	No History of Primary Risk Factors		Hepatocellular Carcinoma	No	C22.0	8170-03-01	C22.0	YES		1.3	1.3
TCGA-XR-A8TF-01	TCGA-XR-A8TF-01	TCGA-XR-A8TF	TCGA Liver Cancer (LIHC)	liver hepatocellular carcinoma	Liver	NO	NO	None	74	3.5	3.9	4.8	TCGA-XR-A8TF-F72323	TCGA-XR-A8TF	TCGA-XR-A8TF-01A	0.2	0.8		A	0.7	1.5	0.8	-27145	481	693	0		271	231	0	6	6	39	3,4 - Fibrous Speta		2015-05-20	MALE	166	Hepatitis B		Hepatocellular Carcinoma	No	C22.0	8170-03-01	C22.0	YES	250	0	1.3
TCGA-XR-A8TG-01	TCGA-XR-A8TG-01	TCGA-XR-A8TG	TCGA Liver Cancer (LIHC)	liver hepatocellular carcinoma	Liver	NO	NO	Mild	58	3.5	4.3	4.8	TCGA-XR-A8TG-F72325	TCGA-XR-A8TG	TCGA-XR-A8TG-01A	0.2	0.5	2		0.7	1.5	0.9	-21544	439		0	898		350	0	6	6	1	6 - Established Cirrhosis		2015-05-20	MALE	184	Hepatitis C		Hepatocellular Carcinoma	No	C22.0	8170-03-01	C22.0	YES	20	0	1.5
TCGA-YA-A8S7-01	TCGA-YA-A8S7-01	TCGA-YA-A8S7	TCGA Liver Cancer (LIHC)	liver hepatocellular carcinoma	Liver			Mild	68	3.5	2.1	5		TCGA-YA-A8S7	TCGA-YA-A8S7-01A	0.2	3.8			0.6	1.3	0.7	-25188	383	412	0						8	56			2014-04-08	MALE	164	Hepatitis C		Hepatocellular Carcinoma	No	C22.0	8170-03-01	C22.0	YES	160	0.9	1.2
TCGA-ZP-A9CV-01	TCGA-ZP-A9CV-01	TCGA-ZP-A9CV	TCGA Liver Cancer (LIHC)	liver hepatocellular carcinoma	Liver			Severe	59	3.5	4	5.7	TCGA-ZP-A9CV-F57756	TCGA-ZP-A9CV	TCGA-ZP-A9CV-01A	0.2	0.5		A	0.7	1.3	0.8	-21633	955	1088	0	142			1	0	8	48			2014-03-28	MALE	173	Alcohol consumption|Hepatitis C		Hepatocellular Carcinoma	No	C22.0	8170-03-01	C22.0	YES	40
TCGA-ZP-A9CY-01	TCGA-ZP-A9CY-01	TCGA-ZP-A9CY	TCGA Liver Cancer (LIHC)	liver hepatocellular carcinoma	Liver			Mild	66	3.5	3.9	5.2	TCGA-ZP-A9CY-F57752	TCGA-ZP-A9CY		0.2	0.9	1	A				-24223			0	782			1				6 - Established Cirrhosis		2014-03-28	FEMALE	152	Non-Alcoholic Fatty Liver Disease		Hepatocellular Carcinoma	No	C22.0	8170-03-01	C22.0	YES		9.6	12.6
TCGA-ZP-A9CZ-01	TCGA-ZP-A9CZ-01	TCGA-ZP-A9CZ	TCGA Liver Cancer (LIHC)	liver hepatocellular carcinoma	Liver				72	3.5	4.4	5.2	TCGA-ZP-A9CZ-F57754	TCGA-ZP-A9CZ	TCGA-ZP-A9CZ-01A	0.2	0.5	2	A				-26403	797		0	706			0	0	8	8	3,4 - Fibrous Speta		2014-03-28	MALE	167	Hepatitis B		Hepatocellular Carcinoma	No	C22.0	8170-03-01	C22.0	YES	50	9.6	12.6
TCGA-ZP-A9D0-01	TCGA-ZP-A9D0-01	TCGA-ZP-A9D0	TCGA Liver Cancer (LIHC)	liver hepatocellular carcinoma	Liver			Mild	67	3.5	4.1	5.2	TCGA-ZP-A9D0-F69077	TCGA-ZP-A9D0	TCGA-ZP-A9D0-01A	0.2	1.4		A	0.5	1.1	0.9	-24525	723		0	1091			0				0 - No Fibrosis		2014-12-29	FEMALE	165	Non-Alcoholic Fatty Liver Disease		Hepatocellular Carcinoma	No	C22.0	8170-03-01	C22.0	YES	100	9.6	12.6
TCGA-ZP-A9D1-01	TCGA-ZP-A9D1-01	TCGA-ZP-A9D1	TCGA Liver Cancer (LIHC)	liver hepatocellular carcinoma	Liver				56				TCGA-ZP-A9D1-F57746	TCGA-ZP-A9D1	TCGA-ZP-A9D1-01A			1	A				-20584	699		0	21			0	0	8	8	5 - Nodular Formation and Incomplete Cirrhosis		2014-03-28	FEMALE	170	Non-Alcoholic Fatty Liver Disease		Hepatocellular Carcinoma	No	C22.0	8170-03-01	C22.0	YES	70	9.6	12.6
TCGA-ZP-A9D2-01	TCGA-ZP-A9D2-01	TCGA-ZP-A9D2	TCGA Liver Cancer (LIHC)	liver hepatocellular carcinoma	Liver	NO	NO	Mild	51				TCGA-ZP-A9D2-F57748	TCGA-ZP-A9D2	TCGA-ZP-A9D2-01A			1	A				-18717	654	765	0	743		315	0				1,2 - Portal Fibrosis		2015-01-16	MALE	172	Hepatitis C		Hepatocellular Carcinoma	No	C22.0	8170-03-01	C22.0	YES	60
TCGA-ZP-A9D4-01	TCGA-ZP-A9D4-01	TCGA-ZP-A9D4	TCGA Liver Cancer (LIHC)	liver hepatocellular carcinoma	Liver			Mild	64	3.5	4.3	5.2	TCGA-ZP-A9D4-F57750	TCGA-ZP-A9D4		0.2	0.4		A	0.5	1.1	0.6	-23656			0	395			0	0	8	2	0 - No Fibrosis		2014-03-28	FEMALE	155	No History of Primary Risk Factors		Hepatocellular Carcinoma	No	C22.0	8170-03-01	C22.0	YES
TCGA-ZS-A9CD-01	TCGA-ZS-A9CD-01	TCGA-ZS-A9CD	TCGA Liver Cancer (LIHC)	liver hepatocellular carcinoma	Liver			Mild	73	36	48	50		TCGA-ZS-A9CD	TCGA-ZS-A9CD-01A	0	8		A	62	106	73	-26915	1268	1386	0				1				5 - Nodular Formation and Incomplete Cirrhosis		2014-04-30	MALE				Hepatocellular Carcinoma	No	C22.0	8170-03-01	C22.0	YES	30	9	12
TCGA-ZS-A9CE-01	TCGA-ZS-A9CE-01	TCGA-ZS-A9CE	TCGA Liver Cancer (LIHC)	liver hepatocellular carcinoma	Liver	NO	NO	None	79	36	44	50	TCGA-ZS-A9CE-F68444	TCGA-ZS-A9CE		0	5		A	44	80	78	-29051			0	1241	892	892	0				0 - No Fibrosis		2014-11-18	FEMALE				Hepatocellular Carcinoma	No	C22.0	8170-03-01	C22.0	YES		9	12
TCGA-ZS-A9CF-01	TCGA-ZS-A9CF-01	TCGA-ZS-A9CF	TCGA Liver Cancer (LIHC)	liver hepatocellular carcinoma	Liver	NO	NO	None	64	36	51	50	TCGA-ZS-A9CF-F68445	TCGA-ZS-A9CF		0	19			62	106	89	-23510			0	2412	700	636	0				0 - No Fibrosis		2014-11-18	MALE		Hemochromatosis		Hepatocellular Carcinoma	No	C22.0	8170-03-01	C22.0	YES		9	12
TCGA-ZS-A9CF-02	TCGA-ZS-A9CF-02	TCGA-ZS-A9CF	TCGA Liver Cancer (LIHC)	liver hepatocellular carcinoma	Liver	NO	NO	None	64	36	51	50	TCGA-ZS-A9CF-F68445	TCGA-ZS-A9CF	TCGA-ZS-A9CF-02A	0	19			62	106	89	-23510	2217		0	2412	700	636	0				0 - No Fibrosis		2014-11-18	MALE		Hemochromatosis		Hepatocellular Carcinoma	No	C22.0	8170-03-01	C22.0	YES	30	9	12
TCGA-ZS-A9CG-01	TCGA-ZS-A9CG-01	TCGA-ZS-A9CG	TCGA Liver Cancer (LIHC)	liver hepatocellular carcinoma	Liver			Mild	55	35	40	50	TCGA-ZS-A9CG-F68446	TCGA-ZS-A9CG	TCGA-ZS-A9CG-01A	0	5		A	62	106	72	-20100	201		0	341			0				0 - No Fibrosis		2014-11-18	MALE	179			Hepatocellular Carcinoma	No	C22.0	8170-03-01	C22.0	YES	50	9.5	14
[truncated: 60 more columns]
